# Supplementary material for: Empirical Multiscale Networks of Cellular Regulation
Source: PLoS Comput Biol. 2007 Oct 19;3(10):e207. doi: 10.1371/journal.pcbi.0030207 (PMC2041980; doi:10.1371/journal.pcbi.0030207)
Supplement: Table S3 — (898 KB XLS) [file pcbi.0030207.st003.xls]

## Sheet: Sheet1
Supplementary Table 3 - Statistical data for effective regulatory interactions between gene groups
n=12							n=20							n=42							n=72
Group Number	Target Group Number	Mean Influence	Standard Deviation	Repetitions	Mean/Stdev		Group Number	Target Group Number	Mean Influence	Standard Deviation	Repetitions	Mean/Stdev		Group Number	Target Group Number	Mean Influence	Standard Deviation	Repetitions	Mean/Stdev		Group Number	Target Group Number	Mean Influence	Standard Deviation	Repetitions	Mean/Stdev
0	0	-1.10416	0.75825	35	1.45619		0	0	-2.092	1.15307	62	1.81428		0	0	0.899198	0.800272	46	1.12362		0	0	1.02011	1.446	105	0.705466
0	1	-1.00476	0.455189	25	2.20734		0	1	-2.35889	1.06719	35	2.21038		0	1	0.441719	0.764637	13	0.577684		0	1	-1.62058	1.5576	18	1.04044
0	2	0.538444	0.431224	25	1.24864		0	2	-2.33735	1.0266	39	2.27678		0	2	0.651301	0.773356	18	0.842175		0	2	-1.17273	2.30509	11	0.508758
0	3	1.08573	0.597895	26	1.81591		0	3	-2.04916	1.02843	31	1.99252		0	3	0.345405	0.89414	12	0.386299		0	3	0.153762	1.57785	17	0.0974506
0	4	-1.2768	0.717573	26	1.77934		0	4	-0.319631	0.980583	32	0.32596		0	4	-0.0614241	0.68562	13	0.0895891		0	4	0.796535	0.716452	15	1.11178
0	5	-0.181075	0.599987	26	0.301799		0	5	-2.71443	1.45102	40	1.87071		0	5	0.10078	0.894922	14	0.112613		0	5	0.202742	1.92258	16	0.105453
0	6	0.437355	0.605887	29	0.721843		0	6	-3.49271	1.54146	37	2.26584		0	6	-0.334667	1.02102	11	0.327776		0	6	-0.0856817	1.95371	17	0.0438558
0	7	0.47058	0.773762	25	0.608171		0	7	-2.02869	1.1534	38	1.75888		0	7	0.77013	0.666379	14	1.15569		0	7	-0.42814	1.7403	14	0.246016
0	8	-2.07001	0.977267	24	2.11816		0	8	-2.14504	1.05588	34	2.03153		0	8	0.778407	0.704885	14	1.1043		0	8	-1.7627	1.96661	22	0.896314
0	9	-1.46498	1.21119	27	1.20954		0	9	-1.60949	0.884915	35	1.81881		0	9	0.346121	0.828629	12	0.417703		0	9	1.50326	1.35461	20	1.10973
0	10	-0.826811	0.909982	24	0.908601		0	10	-3.32532	1.29218	33	2.57342		0	10	0.420132	0.459799	12	0.913731		0	10	-0.363759	1.20038	11	0.303037
0	11	-0.306256	0.969547	23	0.315876		0	11	-3.81787	1.73449	37	2.20115		0	11	0.318626	0.872352	11	0.365249		0	11	0.263654	0.530448	11	0.49704
1	0	2.33097	0.344896	25	6.75848		0	12	-3.02558	1.19717	42	2.52727		0	12	0.338746	0.618893	15	0.547341		0	12	-0.412703	1.70656	13	0.241833
1	1	2.22794	0.33623	37	6.62624		0	13	-2.93149	1.19449	34	2.45417		0	13	0.151512	0.642698	14	0.235743		0	13	0.640992	0.797317	11	0.803937
1	2	1.49944	0.366581	29	4.09035		0	14	-1.7717	1.06841	36	1.65826		0	14	1.39634	0.933896	12	1.49518		0	14	-1.18179	1.76501	14	0.669567
1	3	1.26888	0.730099	28	1.73796		0	15	-5.73876	2.14274	33	2.67823		0	15	1.15211	1.16138	14	0.992017		0	15	-0.16556	1.05148	11	0.157454
1	4	2.18145	0.500473	30	4.35878		0	16	-4.11772	1.34396	36	3.06387		0	16	0.894515	1.11322	13	0.80354		0	16	-0.995556	1.91713	13	0.519295
1	5	2.04557	0.30972	28	6.6046		0	17	-3.48525	1.80605	37	1.92977		0	17	1.1363	0.998242	7	1.1383		0	17	-0.749126	1.20023	14	0.624152
1	6	1.98855	0.405451	27	4.90455		0	18	-3.88979	1.55677	38	2.49864		0	18	0.60414	0.775601	18	0.778931		0	18	0.626961	0.729304	14	0.85967
1	7	1.63226	0.791449	23	2.06237		0	19	-2.01237	1.33232	35	1.51043		0	19	0.32071	0.760168	9	0.421893		0	19	0.570739	0.651563	20	0.875954
1	8	2.87071	0.82518	28	3.47889		1	0	1.21723	0.675809	35	1.80114		0	20	0.199937	0.541301	14	0.369364		0	20	0.0570568	1.04967	14	0.0543571
1	9	2.96172	0.85474	28	3.46506		1	1	2.04674	0.68291	64	2.99709		0	21	1.04687	1.08177	11	0.967744		0	21	0.373962	0.943222	13	0.396473
1	10	2.17983	0.662854	25	3.28855		1	2	2.0247	0.571853	38	3.54059		0	22	0.631603	1.04745	14	0.602989		0	22	-0.236713	1.34312	17	0.176241
1	11	1.88629	0.666339	25	2.83082		1	3	1.92635	0.4646	37	4.14626		0	23	0.914401	0.599262	8	1.52588		0	23	0.32158	0.947296	20	0.339472
2	0	-0.216802	1.16684	25	0.185802		1	4	1.2387	0.559053	37	2.21572		0	24	0.889457	0.792601	13	1.1222		0	24	-0.315474	1.3004	20	0.242597
2	1	-0.866522	0.5584	29	1.5518		1	5	1.32956	0.848226	41	1.56746		0	25	0.607293	0.812139	11	0.74777		0	25	0.000495503	1.01178	12	0.000489731
2	2	0.0722478	0.723327	38	0.0998826		1	6	1.60802	0.838473	33	1.91779		0	26	0.451553	0.763505	15	0.591421		0	26	-0.898779	1.765	17	0.509222
2	3	-1.02043	1.36015	29	0.750231		1	7	0.893629	0.707901	39	1.26236		0	27	-0.0846811	0.720201	8	0.11758		0	27	0.723195	1.31211	19	0.551167
2	4	-1.01367	0.985296	28	1.0288		1	8	1.61327	0.638271	42	2.52756		0	28	1.74916	1.35081	11	1.29489		0	28	0.0328569	1.78326	13	0.0184251
2	5	-0.813599	1.04724	30	0.776899		1	9	1.8041	0.599055	38	3.01157		0	29	1.0122	1.20103	12	0.842778		0	29	0.890015	0.822023	13	1.08271
2	6	-0.701213	1.08655	28	0.645355		1	10	1.20536	1.00325	36	1.20145		0	30	1.16033	1.0711	11	1.0833		0	30	0.28128	1.02297	24	0.274965
2	7	-1.10665	1.70316	27	0.649765		1	11	0.68617	0.993417	31	0.690716		0	31	0.191602	1.24866	15	0.153447		0	31	0.0522155	0.906405	17	0.0576073
2	8	-1.95506	1.7903	26	1.09203		1	12	1.7175	0.995148	35	1.72587		0	32	-0.0732382	0.983116	9	0.074496		0	32	0.0666206	1.1515	23	0.0578554
2	9	-1.78515	1.99688	29	0.893971		1	13	2.31334	0.845693	41	2.73543		0	33	0.62877	0.957089	9	0.656961		0	33	0.0953699	1.3492	16	0.0706861
2	10	-1.36246	1.84698	27	0.73767		1	14	1.98136	0.597869	39	3.31404		0	34	-0.117627	0.908693	8	0.129446		0	34	-0.306392	1.3243	17	0.231361
2	11	-1.1221	1.62985	26	0.688469		1	15	0.0723497	1.34619	36	0.053744		0	35	1.69811	1.30021	12	1.30603		0	35	-0.48877	0.982812	12	0.497318
3	0	0.883379	0.20947	26	4.21721		1	16	1.52778	1.11778	38	1.36681		0	36	1.4823	1.33801	16	1.10784		0	36	0.59314	1.72318	17	0.344213
3	1	0.735294	0.199991	28	3.67663		1	17	2.46461	0.971036	32	2.53813		0	37	0.733665	1.20899	17	0.60684		0	37	0.763833	0.958474	15	0.796926
3	2	0.61308	0.231622	29	2.6469		1	18	3.11284	0.960873	36	3.23959		0	38	0.317688	1.17258	13	0.27093		0	38	0.763969	1.2398	21	0.616201
3	3	1.057	0.384957	39	2.74576		1	19	3.4641	0.659597	40	5.25184		0	39	0.370721	1.19632	16	0.309884		0	39	0.532674	1.78445	13	0.298509
3	4	0.0841467	0.258208	28	0.325887		2	0	0.711238	1.89942	39	0.37445		0	40	0.0793611	1.40389	11	0.0565296		0	40	0.901726	1.25766	18	0.716989
3	5	-0.220048	0.296135	31	0.743068		2	1	-1.03706	1.73711	38	0.597002		0	41	0.495992	0.807272	6	0.614405		0	41	0.178779	1.35399	21	0.132038
3	6	-0.266564	0.337271	31	0.790355		2	2	0.425346	1.98678	63	0.214088		1	0	0.294776	1.4964	13	0.19699		0	42	0.309633	0.969419	13	0.3194
3	7	0.257568	0.375795	25	0.685396		2	3	-0.109579	1.92997	34	0.0567776		1	1	1.00259	1.52344	61	0.658107		0	43	0.126495	1.08878	23	0.11618
3	8	-0.222146	0.480426	30	0.462393		2	4	1.50482	1.81443	37	0.829364		1	2	1.21451	0.965658	19	1.2577		0	44	-0.488509	1.02592	15	0.476166
3	9	0.0564286	0.570161	30	0.0989695		2	5	-0.685099	2.26428	39	0.302568		1	3	1.24005	1.83648	17	0.675231		0	45	1.22677	1.13608	18	1.07983
3	10	0.225382	0.301058	27	0.748633		2	6	0.338332	2.58079	39	0.131096		1	4	0.476875	1.6369	11	0.291328		0	46	0.995039	1.04035	13	0.95645
3	11	0.280637	0.337114	27	0.832468		2	7	1.42039	1.86106	33	0.763215		1	5	0.610976	1.49477	11	0.408743		0	47	1.07238	1.21506	17	0.882567
4	0	1.36778	0.655834	26	2.08555		2	8	2.28456	1.82626	35	1.25095		1	6	-0.676611	2.012	16	0.336288		0	48	1.20294	1.02837	19	1.16976
4	1	0.582137	0.539737	30	1.07856		2	9	0.521512	2.31201	33	0.225567		1	7	-0.579302	1.499	16	0.386458		0	49	-0.582016	1.98428	15	0.293314
4	2	-0.431365	0.608283	28	0.709151		2	10	-0.93485	2.65006	38	0.352766		1	8	-0.158316	2.27747	13	0.069514		0	50	-0.446241	1.5332	24	0.291052
4	3	1.30043	1.32835	28	0.978976		2	11	0.995882	2.41268	34	0.41277		1	9	0.578032	2.11616	15	0.273151		0	51	-0.0724778	0.983055	18	0.0737271
4	4	1.26105	0.539636	39	2.33686		2	12	1.32565	2.34702	37	0.564823		1	10	0.305582	1.24599	14	0.245251		0	52	-0.317601	1.31437	14	0.241637
4	5	0.649547	0.550462	32	1.18		2	13	0.257543	2.20525	35	0.116786		1	11	0.205542	1.68464	14	0.122009		0	53	-0.845125	2.11826	17	0.398971
4	6	0.0212967	0.701546	28	0.0303568		2	14	1.76122	2.2296	36	0.789925		1	12	0.372773	1.49793	21	0.248859		0	54	1.24146	1.40548	17	0.883305
4	7	1.66332	1.50846	29	1.10267		2	15	-0.321768	3.42133	35	0.0940476		1	13	0.320309	2.03501	9	0.157399		0	55	1.44031	1.21443	22	1.186
4	8	2.54215	0.870832	26	2.91922		2	16	0.557849	2.6535	39	0.210231		1	14	0.82628	1.32884	16	0.621806		0	56	1.12989	0.752684	11	1.50115
4	9	2.58908	1.23189	27	2.10171		2	17	2.7135	2.54433	37	1.06649		1	15	0.594981	1.65193	20	0.360172		0	57	0.0417279	1.44624	20	0.0288528
4	10	2.35437	1.03734	29	2.26962		2	18	2.46754	2.74333	37	0.899469		1	16	0.480927	1.66775	19	0.28837		0	58	-0.000869174	1.48891	23	0.000583765
4	11	1.89595	1.26686	29	1.49658		2	19	2.85904	2.63079	38	1.08676		1	17	0.61039	1.64288	18	0.371536		0	59	-0.100284	1.29961	15	0.0771646
5	0	0.91014	0.695495	26	1.30862		3	0	3.82577	1.3833	31	2.76568		1	18	0.029299	1.42183	18	0.0206066		0	60	0.595868	0.983316	13	0.605978
5	1	0.832917	0.451563	28	1.84452		3	1	2.60311	1.38183	37	1.88381		1	19	0.746693	0.830848	9	0.898713		0	61	-0.447997	1.72105	14	0.260305
5	2	0.773732	0.364093	30	2.12509		3	2	3.03877	1.34623	34	2.25725		1	20	0.536634	0.936687	20	0.572906		0	62	-0.313941	1.96466	28	0.159794
5	3	-0.300765	0.595329	31	0.505208		3	3	2.31808	1.43395	57	1.61657		1	21	0.517599	2.04522	24	0.253077		0	63	1.40949	1.11636	8	1.26258
5	4	0.418395	0.480854	32	0.870108		3	4	1.80955	1.05309	30	1.71832		1	22	1.21781	2.44262	20	0.498565		0	64	2.21328	1.40185	10	1.57882
5	5	0.241654	0.429538	39	0.562592		3	5	3.60861	1.6639	36	2.16877		1	23	1.11519	1.68304	19	0.662604		0	65	0.342669	0.993568	15	0.344888
5	6	0.00526633	0.422796	29	0.012456		3	6	3.89205	1.52528	35	2.55169		1	24	0.811739	1.4143	13	0.573951		0	66	0.432439	1.50525	14	0.287287
5	7	-0.29125	0.813627	25	0.357965		3	7	3.54853	1.258	30	2.82078		1	25	1.4485	2.04576	18	0.70805		0	67	0.0276407	0.849681	13	0.0325306
5	8	0.576979	0.687577	29	0.839148		3	8	2.72626	1.36633	29	1.99532		1	26	0.82112	1.2065	16	0.68058		0	68	-0.597461	1.44558	19	0.413303
5	9	0.257869	1.05279	28	0.24494		3	9	3.64827	1.09086	34	3.34439		1	27	0.514672	1.50583	17	0.341787		0	69	-0.560722	2.29939	19	0.243857
5	10	0.186369	0.827721	26	0.22516		3	10	4.24229	1.83296	35	2.31445		1	28	1.62104	2.66988	17	0.60716		0	70	-0.811052	2.39971	21	0.337979
5	11	-0.0161591	0.827681	28	0.0195233		3	11	3.50645	1.4415	35	2.4325		1	29	1.07718	2.14246	21	0.502776		0	71	0.0892822	1.57632	13	0.0566397
6	0	-1.98165	0.382693	29	5.17817		3	12	3.24132	1.4992	31	2.16203		1	30	2.41368	1.00947	10	2.39104		1	0	3.35537	3.42118	18	0.980764
6	1	-1.14005	0.444237	27	2.56631		3	13	3.18012	1.76513	39	1.80163		1	31	1.87922	1.98396	23	0.947205		1	1	2.67092	2.09459	100	1.27515
6	2	-0.729332	0.389696	28	1.87154		3	14	2.58148	1.73914	28	1.48434		1	32	1.55356	2.01387	24	0.771431		1	2	3.79463	2.97674	21	1.27476
6	3	-1.10961	0.551184	31	2.01314		3	15	6.5795	2.07572	34	3.16974		1	33	1.34357	2.01388	14	0.667156		1	3	2.61357	1.68035	22	1.55537
6	4	-1.32844	0.437952	28	3.03329		3	16	4.03018	1.61209	38	2.49997		1	34	0.283619	1.65991	17	0.170864		1	4	2.03158	1.32837	14	1.52938
6	5	-0.811704	0.322306	29	2.51842		3	17	3.39365	2.2559	25	1.50434		1	35	1.76946	2.82029	16	0.627403		1	5	1.93912	2.66468	13	0.727712
6	6	-0.187178	0.405039	39	0.462124		3	18	2.51612	2.04449	34	1.23068		1	36	1.68109	2.12945	17	0.789446		1	6	1.91829	3.09982	18	0.618839
6	7	-1.56843	0.618496	26	2.53588		3	19	-0.553213	2.15844	32	0.256303		1	37	2.08304	2.22425	12	0.936516		1	7	2.27306	2.42683	14	0.936638
6	8	-1.83869	0.740658	29	2.4825		4	0	0.55236	0.49601	32	1.11361		1	38	1.33042	2.38678	20	0.55741		1	8	2.2806	2.8064	18	0.812645
6	9	-2.07103	0.741392	30	2.79344		4	1	0.285168	0.45409	37	0.627999		1	39	1.66392	2.14903	20	0.774262		1	9	2.90801	1.50862	12	1.92759
6	10	-1.88311	0.595073	28	3.1645		4	2	0.513795	0.534538	37	0.961194		1	40	2.17381	2.36465	12	0.919294		1	10	2.06472	1.83025	20	1.12811
6	11	-1.86715	0.543965	27	3.43247		4	3	0.289166	0.363471	30	0.79557		1	41	0.734939	1.58346	12	0.464135		1	11	1.74115	1.24971	14	1.39324
7	0	-0.140941	0.664677	25	0.212044		4	4	0.0978756	0.409312	56	0.239122		2	0	-1.49779	1.57367	18	0.951781		1	12	2.47816	1.99985	16	1.23918
7	1	-0.464174	0.719911	23	0.644766		4	5	0.443369	0.685318	35	0.646954		2	1	-1.90352	0.912059	19	2.08705		1	13	1.58885	1.36292	7	1.16577
7	2	-0.731449	0.791434	27	0.924208		4	6	0.452572	0.697744	30	0.648623		2	2	-0.902873	1.19863	64	0.753251		1	14	2.85058	3.07729	15	0.92633
7	3	-0.777315	0.938777	25	0.828008		4	7	0.377678	0.550663	27	0.68586		2	3	-0.84687	1.32541	17	0.638947		1	15	0.806106	1.86317	18	0.432653
7	4	0.0480145	0.331373	29	0.144896		4	8	0.228454	0.620838	34	0.367977		2	4	-0.296177	1.57426	10	0.188137		1	16	2.24363	2.46874	13	0.908814
7	5	0.000785192	0.646216	25	0.00121506		4	9	0.49673	0.555223	28	0.894649		2	5	-0.74953	1.43369	17	0.522799		1	17	0.256415	1.54228	14	0.166257
7	6	-0.581923	0.942587	26	0.617368		4	10	0.239509	0.734034	29	0.326291		2	6	-1.28679	1.42592	24	0.902431		1	18	2.84901	1.64524	17	1.73166
7	7	0.115986	0.908733	36	0.127635		4	11	0.563143	0.809136	29	0.69598		2	7	-1.69306	0.922063	22	1.83616		1	19	1.07685	1.22936	9	0.875943
7	8	0.614511	0.593334	25	1.03569		4	12	0.777188	0.728263	33	1.06718		2	8	-1.05272	0.861962	18	1.22131		1	20	1.76884	1.83723	16	0.962774
7	9	0.973985	0.548343	27	1.77623		4	13	0.720582	0.802565	33	0.897849		2	9	-0.604428	1.16287	14	0.519771		1	21	1.17835	1.23222	19	0.956281
7	10	0.61664	0.561744	29	1.09772		4	14	0.486449	0.58513	32	0.831351		2	10	-0.941067	1.19135	18	0.789919		1	22	2.01016	1.42084	11	1.41477
7	11	0.135051	0.519905	27	0.259762		4	15	0.60774	1.08787	33	0.558652		2	11	-1.18386	1.14068	17	1.03786		1	23	0.982594	0.993473	20	0.98905
8	0	0.308116	0.535214	24	0.575688		4	16	0.788633	0.933853	40	0.844493		2	12	-0.970802	1.10867	20	0.875646		1	24	1.97937	1.81082	17	1.09308
8	1	-0.168061	0.42892	28	0.391823		4	17	1.02699	0.941054	31	1.09132		2	13	-0.981689	1.08946	16	0.901079		1	25	1.3368	1.60618	12	0.832284
8	2	-0.418815	0.339189	26	1.23476		4	18	0.756806	0.790745	34	0.95708		2	14	-0.536475	1.39025	11	0.385885		1	26	2.27549	2.28086	15	0.997643
8	3	-1.81106	0.605921	30	2.98895		4	19	0.767494	0.689898	32	1.11247		2	15	-1.02608	1.71104	14	0.599684		1	27	2.24577	2.03475	15	1.10371
8	4	-0.38401	0.470681	26	0.815861		5	0	0.651429	0.87021	40	0.748588		2	16	-0.77241	1.0399	20	0.742772		1	28	2.40938	2.03265	19	1.18534
8	5	-0.792492	0.40601	29	1.9519		5	1	0.329726	0.818809	41	0.40269		2	17	-0.862314	1.34546	11	0.640905		1	29	1.67435	1.53982	20	1.08737
8	6	-1.2006	0.320191	29	3.74964		5	2	0.214925	0.855883	39	0.251115		2	18	-0.551387	1.18897	18	0.463753		1	30	1.76647	1.18316	16	1.493
8	7	-2.16815	0.848057	25	2.5566		5	3	0.84739	0.84177	36	1.00668		2	19	-0.794257	0.995102	22	0.798167		1	31	1.95309	1.26611	18	1.54258
8	8	-0.288339	1.01763	37	0.283344		5	4	0.601748	0.887166	35	0.678281		2	20	-1.5654	0.864925	22	1.80986		1	32	1.67937	1.44781	21	1.15994
8	9	-1.21728	1.15697	26	1.05212		5	5	0.607257	0.881822	65	0.688638		2	21	-0.47047	1.44636	19	0.325279		1	33	1.68749	1.5447	13	1.09244
8	10	-1.57569	0.993058	29	1.58671		5	6	-0.352458	0.740056	39	0.476259		2	22	-0.959973	1.31338	22	0.730919		1	34	1.70448	1.41757	14	1.2024
8	11	-1.88709	0.93296	24	2.02269		5	7	-0.353221	0.960538	33	0.367732		2	23	-0.887881	1.89094	14	0.469545		1	35	1.00838	1.02813	10	0.98079
9	0	-0.636505	0.397449	27	1.60148		5	8	-0.122159	0.82708	35	0.147699		2	24	-0.877275	1.52448	14	0.575457		1	36	2.40898	2.01791	22	1.1938
9	1	-0.713231	0.279438	28	2.55238		5	9	0.229818	0.999038	36	0.23004		2	25	-1.71421	1.67062	15	1.02609		1	37	3.11479	1.52513	11	2.04231
9	2	-0.999047	0.248512	29	4.02011		5	10	-0.0841041	0.879571	37	0.0956195		2	26	-2.08469	1.50782	17	1.38258		1	38	1.77546	1.83023	13	0.970071
9	3	-1.2431	0.355929	30	3.49254		5	11	-0.622741	0.809927	37	0.768885		2	27	-1.87955	1.28843	14	1.45879		1	39	2.31628	2.25671	19	1.0264
9	4	-0.510979	0.324302	27	1.57562		5	12	-1.04046	0.966125	41	1.07695		2	28	-0.968961	1.96985	16	0.491896		1	40	1.60279	1.5261	12	1.05026
9	5	-0.386679	0.295225	28	1.30977		5	13	-1.07052	1.0707	35	0.999835		2	29	-1.09175	1.72148	17	0.634193		1	41	1.87436	1.9165	17	0.978015
9	6	-0.621595	0.279772	30	2.22179		5	14	-0.807505	0.975222	37	0.828022		2	30	-1.24267	1.61241	15	0.77069		1	42	2.06904	1.28855	17	1.60571
9	7	-0.796232	0.492066	27	1.61814		5	15	-0.0602906	1.13042	35	0.0533347		2	31	-2.55545	1.90424	20	1.34198		1	43	1.89381	1.28054	16	1.47891
9	8	-0.284993	0.400892	26	0.710897		5	16	-1.09767	1.03357	39	1.06202		2	32	-3.10803	1.69609	16	1.83247		1	44	1.16775	1.41384	16	0.825946
9	9	-0.133789	0.515157	38	0.259706		5	17	-0.7018	1.17096	44	0.599337		2	33	-2.11412	1.57777	22	1.33994		1	45	2.17107	2.37159	20	0.915447
9	10	-0.537595	0.466827	26	1.15159		5	18	-1.59417	1.39811	39	1.14023		2	34	-2.76537	1.24973	15	2.21277		1	46	2.49199	2.1354	22	1.16699
9	11	-0.680486	0.486546	26	1.39861		5	19	-0.454481	1.1957	37	0.380095		2	35	-1.76519	1.93011	19	0.914555		1	47	2.5569	0.822389	11	3.10912
10	0	-0.393957	0.567209	24	0.694553		6	0	-2.20114	1.68524	37	1.30613		2	36	-0.995061	1.95574	16	0.508791		1	48	1.47942	1.07701	14	1.37364
10	1	-1.18307	0.487496	25	2.42684		6	1	-1.85801	1.68725	33	1.1012		2	37	-2.09637	1.54503	18	1.35684		1	49	2.47719	2.4363	19	1.01679
10	2	-1.24761	0.679254	27	1.83674		6	2	-1.75941	1.86646	39	0.942643		2	38	-2.48177	1.92111	15	1.29185		1	50	2.68793	2.15493	15	1.24734
10	3	-0.0402398	0.963255	27	0.0417748		6	3	-2.93593	1.48423	35	1.97809		2	39	-2.58387	1.81279	25	1.42536		1	51	2.07271	1.51381	13	1.36921
10	4	-0.18948	0.477887	29	0.396495		6	4	-3.58836	1.82422	30	1.96706		2	40	-2.32068	2.06181	14	1.12555		1	52	1.61029	1.54554	15	1.04189
10	5	-0.89981	0.66393	26	1.35528		6	5	-1.28526	2.06396	39	0.622717		2	41	-3.03393	1.63304	13	1.85784		1	53	2.78525	3.19228	18	0.872497
10	6	-0.522362	0.690715	28	0.756262		6	6	-0.223885	2.12704	59	0.105257		3	0	-1.90986	0.977104	12	1.95461		1	54	1.3558	2.90028	16	0.467473
10	7	-0.597831	0.807256	29	0.740572		6	7	-1.54567	1.5902	28	0.971998		3	1	-1.21006	0.896414	17	1.34989		1	55	3.03607	2.81741	14	1.07761
10	8	0.753166	0.62311	29	1.20872		6	8	-2.64734	1.60869	35	1.64565		3	2	0.212736	1.26665	17	0.167952		1	56	2.0704	1.506	5	1.37477
10	9	0.0670728	0.676847	26	0.0990958		6	9	-2.62511	1.31392	31	1.99793		3	3	-0.139727	1.33764	54	0.104458		1	57	2.35497	2.23993	23	1.05136
10	10	0.360504	0.688477	37	0.523626		6	10	-1.11705	2.14731	35	0.520207		3	4	0.897193	1.13772	15	0.78859		1	58	2.37818	1.69534	23	1.40278
10	11	-0.509206	0.607841	26	0.837729		6	11	0.413999	2.20999	38	0.187331		3	5	0.446525	1.37432	14	0.324907		1	59	2.6042	1.54942	15	1.68075
11	0	0.399313	0.560184	23	0.712825		6	12	-0.540788	2.07838	38	0.260197		3	6	0.493239	1.33677	15	0.368978		1	60	1.1895	1.68338	10	0.706614
11	1	1.16714	0.701616	25	1.6635		6	13	-1.37726	1.59294	31	0.8646		3	7	-0.287199	0.944584	12	0.304049		1	61	1.92224	2.87345	16	0.668966
11	2	1.84266	0.839041	26	2.19615		6	14	-2.22982	1.54453	31	1.44369		3	8	-0.268859	1.16103	12	0.231569		1	62	2.21546	3.63642	13	0.609242
11	3	1.90837	0.821042	27	2.32433		6	15	-0.253268	2.63887	30	0.0959758		3	9	-0.438303	1.5399	15	0.28463		1	63	2.34373	1.87821	14	1.24785
11	4	0.67047	0.51871	29	1.29257		6	16	-0.678388	2.11129	32	0.321314		3	10	-0.38554	1.1396	12	0.338312		1	64	2.09067	2.95698	15	0.70703
11	5	1.62626	0.518547	28	3.13618		6	17	-2.14154	2.4562	37	0.871893		3	11	0.26492	1.13987	15	0.232412		1	65	1.63273	1.33299	20	1.22486
11	6	2.322	0.687763	27	3.37616		6	18	-1.8693	2.47431	36	0.755484		3	12	-0.0901018	1.35612	20	0.066441		1	66	1.71684	1.31358	15	1.30699
11	7	2.5347	0.713905	27	3.55048		6	19	-3.60333	2.36288	34	1.52497		3	13	0.486989	1.67018	12	0.291578		1	67	1.75183	1.57225	12	1.11422
11	8	-0.0822238	0.693683	24	0.118532		7	0	0.0835311	0.83093	38	0.100527		3	14	-1.42357	1.26128	13	1.12867		1	68	2.3791	2.19718	16	1.0828
11	9	0.542739	0.803209	26	0.675713		7	1	-0.0108492	0.773214	39	0.0140313		3	15	-0.161698	1.06883	17	0.151286		1	69	2.27839	2.59015	27	0.879635
11	10	0.607604	0.610701	26	0.994929		7	2	-0.136031	0.972452	33	0.139884		3	16	-0.406829	1.52779	18	0.266286		1	70	3.41896	4.2271	9	0.80882
11	11	1.60416	0.583598	36	2.74874		7	3	0.176352	0.800091	30	0.220415		3	17	-1.14258	1.07277	10	1.06508		1	71	1.13335	2.10428	20	0.53859
							7	4	0.577002	0.616221	27	0.936355		3	18	0.285319	1.09182	18	0.261325		2	0	-2.23935	3.02316	11	0.74073
							7	5	-0.604832	0.990142	33	0.610854		3	19	0.350163	1.1995	13	0.291923		2	1	-2.65058	2.34194	21	1.13179
							7	6	-0.668249	1.14513	28	0.583555		3	20	-0.083444	1.21833	12	0.0684903		2	2	0.415166	1.95452	97	0.212413
							7	7	-0.252939	0.982916	56	0.257335		3	21	-0.144539	1.51765	17	0.0952389		2	3	1.22499	1.52428	14	0.80365
							7	8	-1.2788	0.685541	33	1.86539		3	22	-0.681051	1.49865	20	0.454442		2	4	1.89665	0.752772	15	2.51956
							7	9	-0.164101	0.786718	32	0.208589		3	23	-0.600248	1.40548	13	0.427076		2	5	1.10197	1.32338	17	0.832689
							7	10	-1.05565	1.12152	28	0.941265		3	24	-0.331889	1.68048	14	0.197496		2	6	0.641525	2.34576	17	0.273483
							7	11	-0.897677	1.39438	32	0.643783		3	25	-0.890959	1.85641	11	0.479936		2	7	0.643619	1.9235	18	0.334608
							7	12	-1.10795	1.13238	32	0.978424		3	26	-0.355659	1.92041	12	0.185199		2	8	1.28647	1.52129	16	0.84564
							7	13	-1.12111	1.10568	33	1.01395		3	27	0.620618	1.73054	11	0.358626		2	9	0.0758747	1.20612	12	0.0629082
							7	14	-0.619157	1.03284	34	0.59947		3	28	-1.54449	1.73534	13	0.890024		2	10	-0.341394	1.4128	22	0.241644
							7	15	-2.1754	1.47987	34	1.47		3	29	-0.55206	1.4472	13	0.381468		2	11	-0.0830832	1.4652	17	0.0567044
							7	16	-1.95011	1.2858	35	1.51665		3	30	-0.809527	1.41028	15	0.574017		2	12	1.60699	1.1893	17	1.35121
							7	17	-1.64314	1.45348	32	1.13049		3	31	0.161068	1.58923	18	0.101349		2	13	1.21948	0.782261	12	1.55891
							7	18	-1.37334	1.18438	32	1.15955		3	32	-0.663324	1.8387	15	0.360758		2	14	-0.302481	2.20992	15	0.136874
							7	19	-0.0667013	1.0128	31	0.0658581		3	33	0.424437	1.81497	11	0.233853		2	15	1.09044	1.79285	17	0.608216
							8	0	1.15829	1.133	34	1.02233		3	34	-0.228592	1.45788	16	0.156797		2	16	0.643152	1.55002	15	0.414933
							8	1	1.36805	1.09363	42	1.25093		3	35	-1.01767	1.78619	19	0.569743		2	17	0.981921	1.20272	17	0.81642
							8	2	1.42606	1.10875	35	1.28618		3	36	-1.19292	2.01847	14	0.591001		2	18	-0.567241	2.10812	20	0.269074
							8	3	1.06152	0.878153	29	1.20881		3	37	-0.629359	1.41955	15	0.443352		2	19	0.173658	1.60759	13	0.108023
							8	4	0.839387	0.814929	34	1.03001		3	38	-0.132697	2.33434	10	0.0568458		2	20	0.0732443	2.37099	16	0.0308918
							8	5	1.07644	1.4481	35	0.743345		3	39	-0.0283273	2.11409	17	0.0133993		2	21	1.24978	1.6265	15	0.768386
							8	6	2.07926	1.38725	35	1.49883		3	40	0.64888	1.88405	18	0.344407		2	22	0.4751	1.15401	15	0.411696
							8	7	2.51565	1.19629	33	2.10288		3	41	0.933733	1.76492	13	0.529052		2	23	0.991196	1.38558	18	0.715366
							8	8	2.33653	1.21178	60	1.92818		4	0	-0.773282	0.762261	13	1.01446		2	24	0.463369	1.42138	15	0.326
							8	9	1.96682	0.881748	34	2.2306		4	1	-0.809221	0.274415	11	2.94889		2	25	1.59078	0.961842	21	1.65389
							8	10	1.67884	1.60149	39	1.0483		4	2	-0.56409	0.384026	10	1.46889		2	26	0.880679	1.51482	24	0.581375
							8	11	2.79192	1.67639	35	1.66543		4	3	-0.90604	0.664739	15	1.363		2	27	0.685286	1.71503	13	0.399578
							8	12	1.88086	1.31526	35	1.43003		4	4	-0.722419	0.545679	47	1.32389		2	28	-0.354228	2.44268	19	0.145016
							8	13	2.28619	1.08314	31	2.1107		4	5	-0.906369	0.772166	14	1.1738		2	29	-0.358999	2.39499	17	0.149896
							8	14	2.19892	0.945875	32	2.32475		4	6	-1.50596	0.574388	10	2.62185		2	30	0.0956139	1.48772	19	0.0642689
							8	15	2.9937	1.94302	33	1.54074		4	7	-0.497235	0.405446	18	1.22639		2	31	-0.371057	1.98907	16	0.186548
							8	16	2.39593	1.93412	37	1.23877		4	8	-0.360014	0.617414	10	0.583099		2	32	0.635096	1.74116	20	0.364756
							8	17	2.0937	1.92112	33	1.08983		4	9	-0.547839	0.71695	14	0.764125		2	33	0.895774	1.44423	18	0.620244
							8	18	1.85911	1.30492	36	1.42469		4	10	-0.639379	0.426097	12	1.50055		2	34	1.07241	1.23938	16	0.86528
							8	19	1.39404	1.08838	38	1.28084		4	11	-0.530725	0.551415	13	0.962479		2	35	0.638868	1.25485	17	0.50912
							9	0	-0.917702	0.967808	35	0.948227		4	12	-0.556969	0.721794	19	0.771645		2	36	-0.74312	2.26231	14	0.328478
							9	1	-1.03774	0.800865	38	1.29577		4	13	-0.749237	0.514812	9	1.45536		2	37	-0.590627	1.7683	19	0.334009
							9	2	-1.01886	0.985428	33	1.03392		4	14	-0.266244	0.726988	10	0.366229		2	38	-0.437691	2.432	20	0.179972
							9	3	-1.87837	0.496981	34	3.77955		4	15	-0.0961571	0.809702	14	0.118756		2	39	-0.0959868	1.97699	23	0.048552
							9	4	-2.01609	0.572836	28	3.51949		4	16	-0.385929	0.731675	16	0.527459		2	40	0.492297	1.93969	27	0.253802
							9	5	-0.370037	1.00186	36	0.369351		4	17	-0.291346	0.720966	9	0.404105		2	41	0.717242	1.41893	24	0.50548
							9	6	-0.936906	1.24617	31	0.75183		4	18	-0.0381741	0.727214	14	0.0524936		2	42	1.29793	1.342	12	0.96716
							9	7	-1.75512	0.870979	32	2.01511		4	19	-0.769674	0.471895	14	1.63103		2	43	1.42459	1.72404	15	0.826306
							9	8	-2.47449	0.848478	34	2.91639		4	20	-0.32959	0.770501	6	0.42776		2	44	1.18846	1.74814	19	0.679843
							9	9	-2.49582	0.781681	58	3.19289		4	21	-0.33352	0.843008	15	0.395631		2	45	-0.500109	2.24978	17	0.222292
							9	10	-0.43502	1.07647	34	0.404117		4	22	-0.0233807	0.754053	14	0.0310067		2	46	-1.39378	2.69208	18	0.517732
							9	11	-1.24977	1.16065	32	1.07679		4	23	0.110693	1.28981	10	0.0858212		2	47	-0.86358	1.69192	12	0.510413
							9	12	-1.62173	1.02974	36	1.57489		4	24	0.254902	0.993913	16	0.256463		2	48	0.573362	1.87188	17	0.306302
							9	13	-2.97108	0.74047	34	4.01242		4	25	-0.0706476	0.907169	13	0.0778771		2	49	0.345561	1.85527	17	0.18626
							9	14	-3.06332	0.727279	30	4.21202		4	26	-0.407735	0.636929	14	0.640158		2	50	0.313652	1.11846	17	0.280431
							9	15	-0.19064	1.68404	36	0.113204		4	27	-0.326107	0.562894	13	0.579341		2	51	1.31555	1.82843	16	0.719498
							9	16	-1.22601	1.10878	38	1.10574		4	28	0.0142271	0.91745	9	0.0155072		2	52	0.930771	1.53389	14	0.606803
							9	17	-2.21714	1.14434	28	1.93749		4	29	0.23547	1.02285	10	0.23021		2	53	1.24586	2.52313	9	0.493777
							9	18	-2.99016	1.05994	39	2.82107		4	30	-0.0310163	1.1494	10	0.0269847		2	54	0.207618	3.01625	13	0.0688332
							9	19	-4.3172	0.420812	30	10.2592		4	31	-0.32548	0.854298	18	0.380992		2	55	-1.57771	3.29793	15	0.478395
							10	0	0.3843	0.979464	33	0.392358		4	32	-0.256587	0.852771	12	0.300886		2	56	1.08601	1.61891	13	0.670829
							10	1	-0.378488	0.840228	36	0.450459		4	33	-0.281982	0.722477	13	0.390299		2	57	-0.222805	2.96014	13	0.0752683
							10	2	-0.134179	1.17233	38	0.114455		4	34	-0.467412	0.488623	13	0.95659		2	58	-0.368036	1.63455	18	0.22516
							10	3	-0.443844	0.982818	35	0.451603		4	35	0.141792	1.00322	7	0.141337		2	59	0.341448	1.62577	17	0.210023
							10	4	-0.587061	0.847647	29	0.692577		4	36	0.745251	1.47167	11	0.506399		2	60	1.97588	1.9686	14	1.00369
							10	5	-0.0756763	1.05479	37	0.0717455		4	37	0.906571	1.30886	17	0.692641		2	61	0.916364	1.33645	15	0.685668
							10	6	-0.20949	1.17437	35	0.178385		4	38	0.0631447	1.22702	14	0.0514618		2	62	0.262601	1.96607	19	0.133566
							10	7	-0.911653	0.913184	28	0.998324		4	39	0.600517	1.25968	13	0.476721		2	63	0.975451	2.01697	11	0.483622
							10	8	-0.501827	0.919929	39	0.545506		4	40	-0.836278	0.717072	13	1.16624		2	64	0.580736	2.21615	18	0.262047
							10	9	-0.862162	0.950305	34	0.907248		4	41	-1.23354	0.913458	11	1.35041		2	65	0.445709	2.14314	19	0.20797
							10	10	0.466603	1.1665	61	0.400003		5	0	-1.05067	1.48284	14	0.708554		2	66	1.00104	2.07906	13	0.481488
							10	11	-0.287333	1.03711	34	0.277051		5	1	-2.03528	1.68163	11	1.2103		2	67	0.6912	2.04949	14	0.337255
							10	12	-0.334901	1.03662	38	0.323071		5	2	-1.43437	1.38666	17	1.0344		2	68	1.63389	1.7311	20	0.94384
							10	13	-0.565872	0.925884	36	0.611169		5	3	-1.39776	1.53099	14	0.912977		2	69	1.93215	2.66818	21	0.724145
							10	14	-0.397461	1.03318	37	0.384697		5	4	0.367974	1.61679	14	0.227596		2	70	0.627085	2.39474	14	0.261859
							10	15	-1.22462	1.31109	34	0.934048		5	5	-0.674285	1.47925	58	0.455828		2	71	1.88324	2.38969	16	0.788069
							10	16	-0.676358	1.28887	40	0.524766		5	6	-1.8141	1.97904	12	0.916654		3	0	-1.55276	1.30131	17	1.19323
							10	17	-0.401769	1.12685	35	0.356541		5	7	-1.52974	0.908408	16	1.68398		3	1	-2.41224	0.910347	22	2.6498
							10	18	-0.0231994	1.26266	39	0.0183734		5	8	-1.84566	1.467	19	1.25812		3	2	-2.31536	1.25989	13	1.83775
							10	19	0.0185883	1.1336	34	0.0163976		5	9	-1.64403	1.29738	16	1.26719		3	3	-0.812206	1.4259	115	0.569609
							11	0	-1.82302	0.699739	37	2.60528		5	10	-1.09988	1.4083	14	0.780997		3	4	-0.380562	1.70359	18	0.223388
							11	1	-1.41905	0.792038	31	1.79164		5	11	-1.50271	1.44572	20	1.03942		3	5	-0.434802	1.21952	22	0.356536
							11	2	-1.90666	0.811805	34	2.34867		5	12	-2.0188	1.49149	16	1.35355		3	6	-0.806399	1.37293	22	0.587354
							11	3	-1.49919	0.660799	35	2.26876		5	13	-2.28655	1.42752	16	1.60176		3	7	-0.6311	1.11842	19	0.564277
							11	4	-0.937702	0.784915	29	1.19465		5	14	-1.84306	1.66814	15	1.10485		3	8	-1.02985	0.894663	25	1.1511
							11	5	-1.69768	0.738774	37	2.29797		5	15	-2.48957	1.94765	24	1.27824		3	9	-1.13804	1.56887	16	0.725391
							11	6	-1.89687	0.796467	38	2.3816		5	16	-2.22911	1.65147	16	1.34977		3	10	-2.03151	1.25736	17	1.6157
							11	7	-1.53838	0.720598	32	2.13487		5	17	-2.26063	1.84406	11	1.2259		3	11	-1.13333	1.36401	14	0.830878
							11	8	-1.35024	0.817175	35	1.65233		5	18	-1.9225	1.76707	16	1.08796		3	12	-0.501111	0.935199	13	0.535834
							11	9	-1.26541	0.598498	32	2.11431		5	19	-1.76619	1.84027	14	0.959741		3	13	-1.69631	1.74439	15	0.972438
							11	10	-1.9511	0.897725	34	2.17338		5	20	-1.90601	1.60592	18	1.18686		3	14	-1.65632	1.2168	17	1.36121
							11	11	-1.54331	0.875917	59	1.76193		5	21	-2.19494	1.34092	23	1.63689		3	15	-1.05273	1.2499	18	0.842249
							11	12	-1.76819	0.694188	38	2.54714		5	22	-3.02957	1.61919	14	1.87104		3	16	-0.677166	1.06109	21	0.638177
							11	13	-1.3893	0.751851	35	1.84784		5	23	-3.66946	1.58874	11	2.30967		3	17	-0.941361	1.05525	21	0.892076
							11	14	-1.26142	0.663564	30	1.90098		5	24	-2.62119	1.50455	18	1.74217		3	18	-1.87615	1.38441	18	1.3552
							11	15	-1.72637	1.22426	34	1.41013		5	25	-2.71651	1.67649	14	1.62035		3	19	-1.12178	1.2867	19	0.871827
							11	16	-2.05398	0.905544	36	2.26822		5	26	-2.42976	1.88271	15	1.29057		3	20	-0.902848	1.28107	15	0.704761
							11	17	-1.59895	1.11604	37	1.43271		5	27	-2.45354	1.06673	17	2.30007		3	21	-0.772731	1.26585	17	0.610443
							11	18	-1.09124	0.992776	33	1.09918		5	28	-2.86282	1.7905	15	1.5989		3	22	-0.942388	1.62893	9	0.578533
							11	19	-0.125757	0.873664	32	0.143942		5	29	-2.89285	2.11707	18	1.36644		3	23	-0.598294	0.956827	18	0.62529
							12	0	1.72312	0.625542	42	2.7546		5	30	-2.64664	1.70617	11	1.55122		3	24	-1.09648	1.43738	14	0.762833
							12	1	0.931	0.658038	35	1.41481		5	31	-2.76064	1.58355	13	1.74333		3	25	-0.956266	1.33319	6	0.717277
							12	2	1.28395	0.736887	37	1.7424		5	32	-2.11255	1.59019	11	1.32849		3	26	-1.24002	1.05766	17	1.17241
							12	3	1.96369	0.682722	31	2.87626		5	33	-2.41573	1.64197	17	1.47124		3	27	-1.7259	1.43838	22	1.19989
							12	4	2.19174	0.720159	33	3.04341		5	34	-1.81406	1.65824	15	1.09397		3	28	-1.0533	1.59047	12	0.662256
							12	5	1.26527	0.811915	41	1.55837		5	35	-3.42355	1.24817	18	2.74285		3	29	-0.958621	1.10474	14	0.867738
							12	6	0.989025	0.81737	38	1.21001		5	36	-3.78502	2.06346	22	1.83431		3	30	-1.32128	0.984484	23	1.34211
							12	7	1.4178	0.556401	32	2.54816		5	37	-4.11465	2.30336	16	1.78637		3	31	-1.21982	1.28058	24	0.95255
							12	8	1.44446	0.650008	35	2.22222		5	38	-3.50596	1.89767	17	1.84751		3	32	-1.51284	1.2783	18	1.18348
							12	9	1.42045	0.511869	36	2.77503		5	39	-3.50258	2.22024	15	1.57757		3	33	-1.1908	1.14149	20	1.0432
							12	10	1.18505	0.918522	38	1.29017		5	40	-2.9682	1.18357	12	2.50784		3	34	-0.920446	1.20229	17	0.765578
							12	11	1.61759	0.605164	38	2.67297		5	41	-2.33086	1.06578	13	2.187		3	35	-1.49702	1.67063	13	0.896077
							12	12	1.3673	0.859947	62	1.58998		6	0	-0.176108	1.80334	11	0.0976566		3	36	-1.48306	1.76571	22	0.83992
							12	13	1.19278	0.868172	35	1.3739		6	1	0.360238	1.12501	16	0.32021		3	37	-1.90577	1.61638	22	1.17904
							12	14	1.35497	0.715437	33	1.89391		6	2	0.0869398	1.27106	24	0.0683994		3	38	-1.33186	1.71665	17	0.775848
							12	15	0.946142	1.06198	32	0.890918		6	3	0.145632	0.84872	15	0.17159		3	39	-1.62015	1.6819	16	0.963282
							12	16	0.698693	1.08258	38	0.645397		6	4	-0.0220535	1.3858	10	0.0159139		3	40	-1.50148	1.51639	18	0.990164
							12	17	0.943438	1.05829	35	0.891472		6	5	1.2586	1.20365	12	1.04565		3	41	-1.58643	1.38725	25	1.14358
							12	18	1.26214	1.02944	39	1.22605		6	6	1.06643	1.3309	55	0.801285		3	42	-2.41954	1.66114	23	1.45655
							12	19	0.977671	1.01671	34	0.961603		6	7	-0.0206032	1.24317	16	0.0165731		3	43	-1.48003	1.41068	20	1.04916
							13	0	0.887227	2.10526	34	0.421433		6	8	0.311529	1.62599	12	0.191594		3	44	-1.22163	1.17568	20	1.03908
							13	1	-0.0953299	2.1289	41	0.0447789		6	9	0.766461	1.24826	13	0.614025		3	45	-1.75963	1.79507	18	0.980254
							13	2	-0.859189	2.25842	35	0.380438		6	10	0.220023	1.3509	14	0.162871		3	46	-2.0778	1.77332	13	1.1717
							13	3	0.249566	1.88094	39	0.132682		6	11	1.33654	1.74281	12	0.766888		3	47	-2.54198	1.68929	26	1.50476
							13	4	1.867	1.44783	33	1.28952		6	12	0.19559	1.19159	16	0.164141		3	48	-1.97112	1.87305	18	1.05236
							13	5	-0.266946	2.5761	35	0.103624		6	13	0.069508	1.44791	16	0.0480056		3	49	-2.0787	1.65929	23	1.25277
							13	6	-0.851401	2.35161	31	0.36205		6	14	0.768185	1.7446	14	0.440322		3	50	-2.14035	1.64333	17	1.30244
							13	7	1.40499	1.97894	33	0.709971		6	15	0.491009	2.02122	24	0.242928		3	51	-1.21984	1.72651	19	0.706536
							13	8	1.19589	1.82517	31	0.65522		6	16	0.574546	1.6311	18	0.352245		3	52	-1.66012	1.28426	12	1.29266
							13	9	1.89567	1.92318	34	0.985697		6	17	0.0654534	0.69842	7	0.0937164		3	53	-1.30603	1.65125	19	0.790933
							13	10	0.305198	2.7232	36	0.112073		6	18	0.175703	1.35393	14	0.129773		3	54	-0.839448	1.52087	24	0.551951
							13	11	0.0275186	2.47781	35	0.011106		6	19	-0.0663471	1.53948	14	0.043097		3	55	-0.94009	1.54216	15	0.609592
							13	12	0.0143807	2.21818	35	0.00648312		6	20	0.388702	1.39808	17	0.278026		3	56	-0.92388	1.60326	22	0.57625
							13	13	0.539678	2.22791	60	0.242235		6	21	-0.0187427	1.55887	17	0.0120233		3	57	-1.34273	1.49655	19	0.897217
							13	14	1.13884	1.74499	36	0.652636		6	22	-0.408824	1.61976	25	0.252399		3	58	-2.13097	1.39286	25	1.52993
							13	15	-0.756261	3.13112	35	0.24153		6	23	0.11333	2.01585	12	0.0562194		3	59	-1.82859	1.66113	21	1.10081
							13	16	-1.15306	2.61273	39	0.441324		6	24	-0.459728	1.52397	20	0.301665		3	60	-1.54815	1.45381	15	1.0649
							13	17	1.11097	2.72771	32	0.407291		6	25	-0.551455	1.63489	12	0.337305		3	61	-1.31261	1.671	18	0.785521
							13	18	0.102376	2.91528	29	0.0351168		6	26	-0.441113	1.04824	14	0.420814		3	62	-1.65789	1.13781	13	1.45709
							13	19	-1.01356	1.48043	37	0.684636		6	27	-0.0147757	1.291	12	0.0114451		3	63	-1.76987	2.02225	13	0.875198
							14	0	-2.08788	1.00261	36	2.08244		6	28	-0.729334	1.0019	11	0.727951		3	64	-1.66952	2.11776	15	0.788344
							14	1	-2.09849	1.15066	39	1.82374		6	29	-0.456562	1.95202	15	0.233892		3	65	-1.76188	1.56218	17	1.12783
							14	2	-2.0046	1.03126	36	1.94383		6	30	-1.25155	0.897244	13	1.39488		3	66	-2.17772	1.93569	23	1.12503
							14	3	-1.41759	0.908964	28	1.55956		6	31	-0.772445	1.08257	20	0.713527		3	67	-1.74102	1.76439	19	0.986753
							14	4	-1.49998	0.914925	32	1.63946		6	32	-0.170435	1.55392	15	0.109681		3	68	-1.69075	1.54161	18	1.09675
							14	5	-2.38744	1.20482	37	1.98158		6	33	-1.5623	1.10531	12	1.41345		3	69	-2.13288	2.23924	16	0.9525
							14	6	-2.73364	1.21391	31	2.25192		6	34	-0.869078	1.6485	11	0.527195		3	70	-1.29534	1.67716	18	0.772341
							14	7	-2.51102	1.15886	34	2.16681		6	35	-0.179512	1.30575	18	0.137478		3	71	-2.85839	2.4372	11	1.17282
							14	8	-2.8101	1.12014	32	2.5087		6	36	-0.638759	1.77324	18	0.36022		4	0	-1.66734	1.05511	15	1.58024
							14	9	-1.16875	0.987593	30	1.18343		6	37	-1.29778	2.00198	14	0.648247		4	1	-1.48438	1.61427	14	0.91954
							14	10	-2.90681	1.44311	37	2.01427		6	38	0.091285	1.62451	16	0.0561923		4	2	-1.40321	1.42296	15	0.986115
							14	11	-3.06931	1.62503	30	1.88877		6	39	-1.10095	1.75734	15	0.626485		4	3	-0.862644	1.6354	18	0.527482
							14	12	-2.01695	1.24426	33	1.621		6	40	-1.14123	1.25277	11	0.910965		4	4	-0.580798	1.31676	101	0.44108
							14	13	-2.03547	1.42222	36	1.43119		6	41	-2.07709	1.48382	9	1.39983		4	5	0.653508	2.17163	15	0.30093
							14	14	-1.08263	1.20878	58	0.895635		7	0	2.58552	1.33034	14	1.9435		4	6	-0.616768	1.10421	19	0.558559
							14	15	-3.15778	1.74174	37	1.813		7	1	2.81199	1.26563	16	2.22182		4	7	-1.49746	1.02878	18	1.45558
							14	16	-2.36778	1.45606	33	1.62615		7	2	2.83826	0.940788	22	3.01689		4	8	-0.0882134	0.991229	21	0.088994
							14	17	-3.43951	1.64476	32	2.09119		7	3	2.25869	1.19509	12	1.88997		4	9	-1.72156	0.807717	17	2.13139
							14	18	-1.41267	1.58912	29	0.88896		7	4	2.12118	1.18417	18	1.79128		4	10	-1.47443	0.905844	15	1.62769
							14	19	-0.789607	1.13652	36	0.694756		7	5	2.08374	1.24149	16	1.67842		4	11	-0.975074	1.01391	20	0.961697
							15	0	1.46365	0.804267	33	1.81986		7	6	1.48215	1.65056	16	0.897969		4	12	-0.107921	0.822352	14	0.131234
							15	1	0.918021	0.800738	36	1.14647		7	7	2.86833	0.993705	62	2.8865		4	13	-1.5391	2.00247	7	0.7686
							15	2	0.837027	0.755289	35	1.10822		7	8	3.06875	0.676278	16	4.5377		4	14	-1.04427	1.29286	9	0.807722
							15	3	0.920681	0.73559	34	1.25162		7	9	3.14524	0.887683	17	3.5432		4	15	-0.95092	1.28338	16	0.740949
							15	4	0.712646	0.805139	33	0.885122		7	10	2.48128	0.506639	14	4.89754		4	16	-1.13723	1.11338	16	1.02142
							15	5	1.14546	1.00091	35	1.14442		7	11	2.47021	0.864149	20	2.85854		4	17	-0.766792	0.912415	16	0.840398
							15	6	0.92102	1.37996	30	0.667423		7	12	1.88219	0.715612	18	2.63018		4	18	-0.991978	1.39244	14	0.712402
							15	7	0.266888	0.843439	34	0.316429		7	13	1.91425	1.04886	16	1.82508		4	19	-1.08691	1.38037	17	0.787404
							15	8	0.0831759	0.772056	33	0.107733		7	14	3.21667	1.21697	10	2.64319		4	20	-1.52272	1.09205	11	1.39437
							15	9	0.145878	0.583863	36	0.249849		7	15	3.32407	0.982938	22	3.38177		4	21	-1.40657	0.959509	16	1.46593
							15	10	1.00509	1.27412	34	0.788853		7	16	3.21057	0.947614	21	3.38806		4	22	-1.092	1.05602	11	1.03408
							15	11	0.598024	1.46419	34	0.408434		7	17	3.05225	0.895607	12	3.40802		4	23	-0.938054	1.24012	13	0.756422
							15	12	0.570085	1.12178	32	0.508199		7	18	2.52348	1.0958	18	2.30286		4	24	-0.970362	1.38355	12	0.701354
							15	13	0.468474	0.954767	35	0.490668		7	19	2.07204	0.995447	15	2.08152		4	25	-1.00883	1.26574	20	0.797028
							15	14	0.26037	0.737932	37	0.352837		7	20	1.68449	1.06377	19	1.58351		4	26	-0.883812	1.19857	15	0.737387
							15	15	1.44608	1.91845	59	0.753775		7	21	3.1205	1.32287	17	2.35889		4	27	-1.01724	0.898578	16	1.13206
							15	16	-0.0462503	1.3491	39	0.0342824		7	22	3.41504	1.09021	19	3.13245		4	28	-1.28892	0.948717	18	1.35859
							15	17	0.353227	1.45471	31	0.242815		7	23	3.21608	1.66571	12	1.93076		4	29	-0.832067	1.45456	20	0.572041
							15	18	-0.0922878	1.34931	33	0.0683961		7	24	2.42499	1.10903	19	2.18659		4	30	-0.914672	0.897301	22	1.01936
							15	19	-0.00304802	0.866505	35	0.00351761		7	25	3.0356	1.47844	16	2.05325		4	31	-0.900805	1.16471	16	0.773417
							16	0	-0.228205	0.94895	36	0.240482		7	26	1.91033	1.78049	16	1.07293		4	32	-0.769226	1.25548	18	0.612697
							16	1	0.155465	0.813776	38	0.191041		7	27	1.78035	1.41282	14	1.26014		4	33	-1.01875	1.08304	16	0.94064
							16	2	0.291179	0.686749	39	0.423997		7	28	3.64973	1.92633	11	1.89466		4	34	-1.12763	1.16287	16	0.969689
							16	3	-0.534988	0.752387	38	0.711054		7	29	3.33181	1.91361	24	1.74112		4	35	-1.08815	0.645498	10	1.68576
							16	4	-2.2537	0.672497	40	3.35124		7	30	2.27063	1.42309	9	1.59556		4	36	-0.810818	1.52206	16	0.53271
							16	5	0.804854	0.831167	39	0.968342		7	31	2.33704	1.76858	21	1.32142		4	37	-1.03365	1.11353	22	0.928265
							16	6	1.58969	0.916147	32	1.7352		7	32	2.07046	1.71769	14	1.20538		4	38	-0.947137	0.880903	19	1.07519
							16	7	0.195547	0.685347	35	0.285325		7	33	1.41323	1.73233	14	0.815798		4	39	-0.546409	1.521	13	0.359244
							16	8	-0.0237126	0.744175	37	0.0318642		7	34	1.01901	1.95185	19	0.522076		4	40	-1.37231	0.812545	21	1.6889
							16	9	-0.296069	0.54654	38	0.541715		7	35	3.81203	1.8777	20	2.03015		4	41	-0.493947	1.26365	19	0.390891
							16	10	1.20041	0.923202	40	1.30027		7	36	3.48251	1.6944	15	2.05531		4	42	-1.03486	1.30265	14	0.794424
							16	11	1.75082	0.905067	36	1.93447		7	37	2.25548	1.55713	23	1.44848		4	43	-0.787729	1.24705	19	0.631673
							16	12	1.41629	0.631977	38	2.24105		7	38	2.24603	1.6284	18	1.37929		4	44	-0.674683	1.27509	16	0.529126
							16	13	0.908521	0.705679	39	1.28744		7	39	1.54818	1.98444	20	0.780161		4	45	-0.85116	1.52114	19	0.559554
							16	14	-0.450518	0.639827	33	0.704125		7	40	1.54808	1.7722	18	0.873539		4	46	-1.03236	1.19327	15	0.865154
							16	15	2.90816	1.24719	39	2.33178		7	41	1.49697	1.36268	11	1.09855		4	47	-0.525911	1.54206	14	0.341044
							16	16	3.18259	0.912679	64	3.48708		8	0	-0.408503	1.51793	14	0.269118		4	48	-0.586825	1.82276	23	0.321943
							16	17	1.50588	0.991494	35	1.5188		8	1	0.404717	1.66177	13	0.243547		4	49	-0.0962713	1.95383	10	0.0492732
							16	18	1.55332	0.851944	38	1.82327		8	2	0.237065	1.6557	18	0.143181		4	50	-0.967282	1.54047	15	0.627912
							16	19	-0.606437	0.784387	34	0.773134		8	3	1.11047	2.00219	12	0.554629		4	51	-1.4927	0.957526	14	1.55891
							17	0	0.225802	0.68346	37	0.330381		8	4	-0.893444	1.20459	10	0.741699		4	52	-0.286291	1.60057	17	0.178869
							17	1	0.644238	0.637783	32	1.01012		8	5	-0.831462	1.39672	19	0.595296		4	53	-0.571263	1.32377	14	0.431544
							17	2	0.484534	0.672778	37	0.720199		8	6	-0.0657635	1.61859	12	0.0406302		4	54	-1.1696	1.48462	15	0.787809
							17	3	0.517061	0.800204	25	0.646161		8	7	-1.02301	0.909119	16	1.12527		4	55	-1.44102	1.2295	14	1.17203
							17	4	0.434244	0.858449	31	0.505847		8	8	0.813964	1.76182	58	0.462001		4	56	-0.323772	1.0247	18	0.315969
							17	5	0.305838	0.762042	44	0.40134		8	9	1.13607	2.37896	18	0.477547		4	57	-0.916923	1.78507	17	0.513662
							17	6	0.343346	0.724978	37	0.473595		8	10	-0.121046	1.3806	14	0.087676		4	58	-1.20215	1.13854	20	1.05587
							17	7	0.462	0.654313	32	0.706084		8	11	0.412932	1.7903	18	0.23065		4	59	-1.60272	1.9222	16	0.833794
							17	8	0.298312	0.694635	33	0.429452		8	12	0.339294	1.50873	15	0.224887		4	60	-0.777705	1.7358	13	0.448039
							17	9	0.649648	0.614529	28	1.05715		8	13	-0.870479	1.47678	20	0.589445		4	61	-0.540333	1.76586	10	0.305988
							17	10	0.538207	0.805896	35	0.667837		8	14	-0.679842	1.17187	14	0.580132		4	62	-1.16115	1.48115	17	0.78395
							17	11	-0.0390624	0.741618	37	0.0526718		8	15	0.177361	1.74105	11	0.10187		4	63	-1.26491	1.4623	16	0.865014
							17	12	-0.484114	0.71502	35	0.677064		8	16	0.69956	1.76599	22	0.39613		4	64	-1.36261	1.36217	14	1.00033
							17	13	-0.0110969	0.844389	32	0.0131419		8	17	0.863539	1.96502	15	0.439456		4	65	-0.763415	1.19021	26	0.641414
							17	14	0.117049	0.741582	32	0.157837		8	18	-0.563921	1.48526	21	0.379678		4	66	-0.596382	1.76904	16	0.337122
							17	15	0.117406	0.871128	31	0.134775		8	19	-0.118287	1.93048	15	0.0612736		4	67	-0.415345	1.83641	21	0.226172
							17	16	-0.117216	0.810945	35	0.144543		8	20	-0.562948	2.00212	11	0.281175		4	68	-1.21519	1.26962	12	0.957128
							17	17	0.46217	0.803368	58	0.575291		8	21	1.51891	2.03005	25	0.748212		4	69	-0.681486	1.81999	13	0.374445
							17	18	-0.588245	0.930202	32	0.632384		8	22	1.79586	1.99335	20	0.900929		4	70	-0.0505079	1.70952	14	0.0295451
							17	19	0.333936	0.734582	33	0.454593		8	23	0.370524	2.63529	13	0.140601		4	71	-0.828927	2.58007	15	0.321281
							18	0	-1.22119	0.684001	38	1.78537		8	24	-0.293826	1.67625	16	0.175288		5	0	-1.32465	0.830932	16	1.59417
							18	1	-1.07878	0.661003	36	1.63204		8	25	-0.271134	2.36323	11	0.11473		5	1	-1.45335	0.742734	13	1.95676
							18	2	-0.647882	0.671226	37	0.965222		8	26	-0.295176	2.53626	14	0.116382		5	2	-1.0167	0.82996	17	1.225
							18	3	-0.62109	0.721017	34	0.861407		8	27	-0.421786	2.22975	15	0.189163		5	3	-0.60248	0.86859	22	0.69363
							18	4	-0.496957	0.801084	34	0.620355		8	28	1.39315	2.20122	15	0.632901		5	4	-0.946761	0.895829	15	1.05685
							18	5	-1.12559	0.686362	39	1.63994		8	29	-0.00533352	2.49022	18	0.00214179		5	5	-0.308525	0.941319	99	0.327758
							18	6	-0.979332	0.696371	36	1.40634		8	30	0.766529	2.91052	16	0.263365		5	6	-0.881286	0.980802	15	0.898536
							18	7	-1.04634	0.77478	32	1.3505		8	31	-1.60532	2.45021	14	0.655177		5	7	-0.715552	0.953032	15	0.750816
							18	8	-0.533148	0.743052	36	0.717511		8	32	-1.16898	1.89065	10	0.618296		5	8	-0.435272	0.735189	12	0.592055
							18	9	-0.864187	0.806718	39	1.07124		8	33	-0.646933	2.7597	14	0.234422		5	9	-0.60578	1.02207	12	0.592701
							18	10	-1.36491	0.710187	39	1.9219		8	34	-1.84849	1.93044	13	0.95755		5	10	-1.01401	0.521168	16	1.94566
							18	11	-1.07485	0.70554	33	1.52344		8	35	0.733199	2.87272	17	0.255228		5	11	-0.63037	0.748457	21	0.842226
							18	12	-0.495757	0.615432	39	0.805543		8	36	-0.464657	2.99677	22	0.155053		5	12	-0.00616671	0.678721	17	0.00908578
							18	13	-0.594114	0.836753	29	0.710024		8	37	-1.23945	2.62144	18	0.472814		5	13	-0.408242	0.683814	19	0.597007
							18	14	-0.455322	0.714866	29	0.636933		8	38	-0.948116	2.84471	19	0.333291		5	14	-0.889154	1.06078	15	0.838212
							18	15	-1.72561	0.870705	33	1.98186		8	39	-0.782942	3.71154	14	0.210948		5	15	-0.727119	0.690821	20	1.05254
							18	16	-1.23386	0.742871	38	1.66093		8	40	-0.885725	2.9969	10	0.295547		5	16	-0.672697	0.563178	16	1.19447
							18	17	-0.392568	0.841825	32	0.466329		8	41	-1.84369	2.68671	16	0.686226		5	17	-0.5114	0.8018	12	0.637816
							18	18	0.223044	0.829309	60	0.268952		9	0	-1.13583	0.610741	12	1.85976		5	18	-0.73721	0.923721	21	0.798087
							18	19	-0.154785	1.01023	27	0.153217		9	1	-1.22758	0.479339	15	2.56098		5	19	-0.14849	0.747718	13	0.198592
							19	0	0.83663	0.536297	35	1.56001		9	2	-1.1849	0.523793	14	2.26216		5	20	-0.83788	1.13371	15	0.739058
							19	1	1.3568	0.488427	40	2.7779		9	3	-1.10197	0.485749	15	2.2686		5	21	-0.86312	1.05972	16	0.814479
							19	2	1.26425	0.550515	38	2.29649		9	4	-1.30403	0.72128	14	1.80794		5	22	-0.62613	0.702387	19	0.891432
							19	3	0.942305	0.409338	32	2.30202		9	5	-1.50513	0.510098	16	2.95067		5	23	-0.579842	0.85242	24	0.68023
							19	4	0.313355	0.440897	32	0.710722		9	6	-1.34661	0.539567	13	2.49572		5	24	-0.704198	0.503754	15	1.3979
							19	5	1.36835	0.65888	37	2.07679		9	7	-1.22176	0.389272	17	3.13858		5	25	-0.24667	0.892989	17	0.276229
							19	6	1.22221	0.676907	34	1.80559		9	8	-1.21513	0.532924	18	2.28011		5	26	-0.308836	0.766701	15	0.402812
							19	7	0.40979	0.476385	31	0.860208		9	9	-1.40408	0.611633	59	2.29562		5	27	-0.623011	1.27932	14	0.486986
							19	8	0.573031	0.498438	38	1.14965		9	10	-1.21571	0.236537	12	5.13962		5	28	-0.835512	0.895999	12	0.932492
							19	9	0.964176	0.41066	30	2.34787		9	11	-1.48934	0.776223	16	1.9187		5	29	-0.824249	1.39172	18	0.592251
							19	10	1.24222	0.596338	34	2.08309		9	12	-1.61449	0.35707	14	4.52149		5	30	-0.504651	0.859303	22	0.587279
							19	11	0.706145	0.620727	32	1.13761		9	13	-1.94401	0.623426	11	3.11827		5	31	-0.301041	0.944639	13	0.318683
							19	12	0.839962	0.524056	34	1.60281		9	14	-1.10719	0.70905	14	1.56151		5	32	-0.80969	1.43842	19	0.562901
							19	13	1.34697	0.364662	37	3.69376		9	15	-1.271	0.55316	19	2.29771		5	33	-0.822206	0.594346	18	1.38338
							19	14	1.22481	0.317006	36	3.86366		9	16	-1.37861	0.701297	9	1.9658		5	34	-0.576363	0.880892	19	0.654294
							19	15	1.09696	0.667614	35	1.64311		9	17	-1.57149	0.696119	15	2.2575		5	35	-0.730134	0.828877	14	0.880872
							19	16	1.28517	0.677948	34	1.89568		9	18	-1.08744	0.482661	12	2.25301		5	36	-0.820455	1.07112	21	0.76598
							19	17	0.942619	0.602232	33	1.56521		9	19	-1.49199	0.653351	14	2.2836		5	37	-0.359222	1.02178	17	0.351564
							19	18	1.47583	0.447775	27	3.29592		9	20	-1.34125	0.521469	22	2.57206		5	38	-0.691396	0.851005	12	0.812446
							19	19	1.90751	0.342405	59	5.57091		9	21	-1.02211	0.520825	23	1.96249		5	39	-0.831165	1.22169	19	0.680338
														9	22	-1.21511	0.674626	12	1.80116		5	40	-0.256521	0.937248	22	0.273696
														9	23	-1.24226	0.929754	16	1.33611		5	41	-0.609798	0.812952	25	0.750104
														9	24	-1.15016	0.526122	27	2.18611		5	42	-0.20599	1.04648	12	0.196842
														9	25	-1.68332	0.61919	18	2.71859		5	43	-0.561382	0.863819	19	0.649883
														9	26	-1.13222	0.534346	21	2.11888		5	44	-0.715025	0.886334	13	0.806722
														9	27	-1.29455	0.52875	15	2.44832		5	45	-0.720333	1.20449	14	0.598041
														9	28	-1.07659	0.557174	16	1.93224		5	46	0.488629	0.749845	13	0.65164
														9	29	-1.11509	0.788638	18	1.41395		5	47	-0.287387	0.82338	14	0.349033
														9	30	-0.908912	0.69206	13	1.31334		5	48	-0.922941	1.22478	19	0.753558
														9	31	-1.04614	0.575259	21	1.81856		5	49	-0.347228	0.840825	17	0.412961
														9	32	-0.976475	0.640015	10	1.52571		5	50	-0.463624	0.905714	21	0.511888
														9	33	-1.33191	0.801472	21	1.66183		5	51	-0.233647	1.20361	18	0.194122
														9	34	-1.04377	0.465819	16	2.24072		5	52	-0.243311	1.25125	19	0.194454
														9	35	-1.16084	0.890489	19	1.30359		5	53	-0.542335	1.15325	15	0.470267
														9	36	-0.848212	0.679271	15	1.24871		5	54	-0.461079	1.54049	16	0.299306
														9	37	-1.01432	0.593438	18	1.70922		5	55	-0.371011	1.22309	16	0.303339
														9	38	-0.895785	0.679918	12	1.31749		5	56	-0.369922	0.926083	20	0.399448
														9	39	-0.985671	0.670323	16	1.47044		5	57	-1.18334	1.28479	16	0.921037
														9	40	-1.25433	0.537781	17	2.33241		5	58	-0.903085	1.14419	16	0.78928
														9	41	-1.25091	0.632155	13	1.97881		5	59	0.0294393	0.800569	14	0.0367729
														10	0	-1.1523	2.60656	12	0.442076		5	60	-0.304362	0.752705	18	0.404357
														10	1	-0.233193	1.95993	14	0.11898		5	61	0.154822	0.991958	18	0.156077
														10	2	0.491385	2.02424	18	0.242751		5	62	-0.376104	0.760237	16	0.494719
														10	3	1.78461	1.57323	12	1.13436		5	63	-0.868802	1.20036	14	0.723782
														10	4	0.759534	2.94097	12	0.25826		5	64	-0.398491	0.784138	9	0.508189
														10	5	1.64441	2.40969	14	0.682416		5	65	0.174989	1.41192	17	0.123937
														10	6	2.40995	2.18604	14	1.10242		5	66	-0.209189	1.08448	23	0.192894
														10	7	-1.37522	0.997667	14	1.37844		5	67	-0.477831	1.46506	19	0.32615
														10	8	-0.0931627	1.86655	14	0.0499118		5	68	-0.763421	1.0477	20	0.728664
														10	9	0.967681	2.00687	12	0.482183		5	69	-0.632904	1.12064	12	0.564773
														10	10	0.68603	1.69677	51	0.404316		5	70	-0.687687	1.90507	14	0.360977
														10	11	1.16106	1.86778	7	0.621625		5	71	-0.918052	2.01788	12	0.454959
														10	12	-0.614257	1.4747	14	0.41653		6	0	-0.901372	1.09375	17	0.82411
														10	13	0.629183	1.17033	14	0.537611		6	1	-0.719306	0.930161	18	0.773313
														10	14	-1.20202	2.03865	12	0.589616		6	2	-0.27455	1.03549	17	0.26514
														10	15	-1.66281	1.86008	18	0.893947		6	3	-0.224387	1.09603	22	0.204728
														10	16	-0.866049	1.3049	14	0.663691		6	4	0.0513028	1.04083	19	0.0492902
														10	17	-0.189868	1.32247	10	0.14357		6	5	-0.0799606	1.35843	15	0.0588625
														10	18	-0.364053	1.35912	15	0.267858		6	6	-0.0537859	1.08755	106	0.0494562
														10	19	0.514579	1.50928	17	0.340944		6	7	-0.619072	1.10549	14	0.56
														10	20	1.47049	1.14667	14	1.2824		6	8	0.211578	0.695759	17	0.304097
														10	21	0.244241	2.61989	9	0.0932256		6	9	-0.666181	1.10931	14	0.600538
														10	22	-1.22452	2.13447	26	0.573689		6	10	-0.0407853	1.10758	20	0.0368239
														10	23	-0.0529039	1.81954	7	0.0290753		6	11	-0.410965	0.888104	18	0.462744
														10	24	0.576461	2.1805	17	0.264371		6	12	0.330743	0.600215	17	0.551041
														10	25	1.23629	2.04231	16	0.605339		6	13	0.468842	0.640996	18	0.731427
														10	26	2.14795	2.36047	16	0.90997		6	14	-0.0620344	1.38406	16	0.0448207
														10	27	1.5034	1.99276	15	0.754429		6	15	-0.137276	0.957502	22	0.143369
														10	28	-0.953062	3.43314	11	0.277606		6	16	-0.436851	0.845057	12	0.516948
														10	29	-0.983398	2.69624	10	0.36473		6	17	-0.0735479	0.886509	18	0.0829636
														10	30	0.5796	2.19067	14	0.264577		6	18	-0.541916	0.471484	9	1.14938
														10	31	0.579146	1.54382	12	0.375138		6	19	0.0814422	1.06661	16	0.0763558
														10	32	1.89671	1.51677	11	1.2505		6	20	0.0817614	0.862324	17	0.0948152
														10	33	2.39056	2.5121	17	0.951616		6	21	-0.187643	1.12979	14	0.166086
														10	34	3.0459	1.34882	16	2.25819		6	22	-0.885598	1.12955	12	0.78403
														10	35	-0.943818	3.32791	13	0.283607		6	23	0.172099	1.14702	27	0.15004
														10	36	-0.474533	2.80776	13	0.169007		6	24	-0.0775064	1.11698	10	0.0693891
														10	37	1.49707	2.68832	18	0.556879		6	25	0.301243	0.890628	15	0.338236
														10	38	1.56378	2.27479	11	0.687439		6	26	-0.160412	1.00076	16	0.160291
														10	39	1.67119	1.88153	17	0.888208		6	27	-0.0216895	1.40084	23	0.0154831
														10	40	3.00452	1.28365	12	2.3406		6	28	-0.418965	1.2536	14	0.33421
														10	41	4.75997	3.50791	9	1.35693		6	29	0.0432391	1.52764	16	0.0283044
														11	0	-0.015855	1.23348	11	0.0128538		6	30	-0.243523	1.3001	20	0.187311
														11	1	-0.618174	1.40068	14	0.441338		6	31	-0.232747	0.881716	17	0.263971
														11	2	-0.197789	1.24214	17	0.159232		6	32	0.0316481	1.36683	25	0.0231544
														11	3	0.27952	1.67376	15	0.167001		6	33	-0.380149	0.813593	16	0.467247
														11	4	-0.0150242	1.0447	13	0.0143813		6	34	-0.175902	1.19431	19	0.147284
														11	5	-0.0065644	1.74031	20	0.00377198		6	35	0.0485822	1.24086	21	0.0391522
														11	6	0.0565465	1.50094	12	0.037674		6	36	-0.121181	1.41354	15	0.0857293
														11	7	-1.04627	1.28146	20	0.81647		6	37	0.00538688	1.63592	19	0.00329288
														11	8	-0.361284	1.14163	18	0.316462		6	38	0.571719	0.97463	18	0.586602
														11	9	-0.102592	1.23673	16	0.0829547		6	39	-0.585497	1.14433	18	0.511651
														11	10	-0.56267	0.919154	7	0.612161		6	40	-0.0431594	0.852404	21	0.0506326
														11	11	-0.0250918	1.28837	51	0.0194756		6	41	-0.823919	0.663106	17	1.24251
														11	12	-1.95427	1.21605	13	1.60706		6	42	-0.390072	0.993532	19	0.392612
														11	13	-0.763207	1.43413	12	0.532176		6	43	-0.42643	1.34586	12	0.316845
														11	14	-0.884988	1.56627	11	0.565031		6	44	-0.173868	1.03157	23	0.168546
														11	15	-0.948789	1.11664	14	0.849683		6	45	-0.684153	1.59466	13	0.429029
														11	16	-1.38544	1.29578	15	1.06919		6	46	-0.629852	1.65019	15	0.381684
														11	17	-0.354913	0.988838	7	0.358919		6	47	-0.434633	1.18838	21	0.365735
														11	18	-0.896146	1.21102	17	0.739991		6	48	-0.958934	1.06093	13	0.903862
														11	19	-0.617178	1.63704	13	0.377009		6	49	-0.431215	0.830481	23	0.519235
														11	20	-0.806552	1.23191	19	0.654716		6	50	-0.772207	1.43895	19	0.536645
														11	21	-0.752604	1.36135	19	0.552838		6	51	-0.710372	0.939512	20	0.756108
														11	22	-0.30586	1.47825	13	0.206907		6	52	-1.24653	1.19523	20	1.04292
														11	23	-0.565367	1.13849	11	0.496594		6	53	-1.03085	1.02409	13	1.0066
														11	24	-0.0319124	1.23865	16	0.0257639		6	54	-0.399278	2.10285	21	0.189875
														11	25	-1.16585	1.6657	15	0.699915		6	55	-0.767161	1.17495	13	0.652929
														11	26	-0.862632	2.10174	11	0.410437		6	56	-0.957979	1.39637	16	0.686048
														11	27	-0.87932	2.19301	14	0.400965		6	57	-0.700316	1.1414	21	0.613559
														11	28	-1.51983	1.82057	16	0.834809		6	58	-0.320099	1.15598	22	0.276906
														11	29	-0.789025	2.50117	14	0.315462		6	59	-1.22134	1.43294	14	0.852334
														11	30	-0.451997	1.97663	8	0.22867		6	60	-0.677034	1.07258	13	0.63122
														11	31	-0.0445409	1.87556	14	0.023748		6	61	-2.02668	1.17736	16	1.72138
														11	32	-0.556455	1.63204	14	0.340957		6	62	-1.32813	1.47855	16	0.898268
														11	33	-0.540571	2.783	11	0.19424		6	63	-0.834513	1.39133	17	0.599796
														11	34	0.0724819	1.988	14	0.0364596		6	64	-0.612189	1.36127	9	0.44972
														11	35	-1.41833	2.04233	17	0.694469		6	65	-1.11757	1.40578	21	0.794981
														11	36	-0.248848	1.78636	16	0.139304		6	66	-0.369804	1.2911	16	0.286425
														11	37	-0.504378	2.11752	13	0.238193		6	67	-1.11343	1.02238	17	1.08906
														11	38	-0.724315	1.76939	11	0.409359		6	68	-1.11001	1.13895	23	0.974591
														11	39	-0.565195	1.32377	14	0.426959		6	69	-1.47892	1.26087	18	1.17293
														11	40	0.628314	2.42811	9	0.258767		6	70	-1.76886	1.82211	20	0.970777
														11	41	0.804367	2.33784	7	0.344064		6	71	-1.98963	1.59582	19	1.24677
														12	0	3.73073	1.52839	15	2.44096		7	0	0.423904	1.289	14	0.328864
														12	1	2.97962	1.85088	21	1.60984		7	1	0.0744069	0.907805	14	0.0819636
														12	2	2.71599	1.36365	20	1.99171		7	2	0.475155	1.07426	18	0.442308
														12	3	3.30291	1.6734	20	1.97377		7	3	0.634424	0.963162	19	0.658688
														12	4	3.80573	1.31522	19	2.8936		7	4	0.923898	0.672513	18	1.3738
														12	5	4.65817	2.05319	16	2.26875		7	5	0.933873	0.800286	15	1.16693
														12	6	3.02611	1.89355	16	1.59812		7	6	1.2651	0.687959	14	1.83892
														12	7	0.685235	2.20887	18	0.310219		7	7	1.20243	1.02193	92	1.17663
														12	8	1.65549	1.69869	15	0.974572		7	8	0.859304	1.08994	16	0.788399
														12	9	2.61723	1.91476	14	1.36687		7	9	0.460407	1.33865	19	0.343935
														12	10	2.59224	1.94108	14	1.33546		7	10	0.247757	1.20329	12	0.2059
														12	11	3.92554	1.48219	13	2.64848		7	11	0.457324	0.765784	7	0.597197
														12	12	2.97245	1.78131	64	1.66869		7	12	2.10182	0.790976	12	2.65725
														12	13	2.44216	1.91618	18	1.27449		7	13	0.655093	0.743421	8	0.881188
														12	14	0.701271	2.05937	15	0.340528		7	14	0.717296	0.743257	8	0.965072
														12	15	0.430554	2.20441	15	0.195315		7	15	1.15746	0.945169	19	1.2246
														12	16	0.949066	2.25902	22	0.420123		7	16	0.787703	1.1084	12	0.710668
														12	17	0.809705	0.905316	11	0.894389		7	17	1.5759	0.721822	11	2.18323
														12	18	1.388	2.19619	19	0.632006		7	18	1.12295	1.04158	11	1.07812
														12	19	2.79845	1.88928	14	1.48123		7	19	0.576698	1.09659	14	0.5259
														12	20	3.49363	1.7461	17	2.00082		7	20	1.07638	0.835614	10	1.28813
														12	21	1.42369	2.87863	20	0.494572		7	21	0.925432	0.886923	15	1.04342
														12	22	0.855845	2.12874	19	0.402043		7	22	1.1387	0.706328	10	1.61214
														12	23	1.21814	2.99295	14	0.407004		7	23	1.43075	0.504921	15	2.83362
														12	24	2.06936	2.35754	17	0.87776		7	24	0.799771	0.945624	15	0.84576
														12	25	2.54083	2.54181	20	0.999614		7	25	1.10164	1.19006	17	0.925702
														12	26	3.69578	2.48832	16	1.48525		7	26	0.754609	0.858374	13	0.879115
														12	27	3.67636	2.66933	15	1.37726		7	27	1.20344	0.919132	15	1.30933
														12	28	1.88164	3.05828	16	0.61526		7	28	0.954623	1.02405	14	0.9322
														12	29	0.0299764	2.83157	17	0.0105865		7	29	0.884311	1.34259	18	0.658662
														12	30	2.70402	3.14772	13	0.85904		7	30	0.55292	1.28562	17	0.430079
														12	31	2.37546	2.3117	24	1.02758		7	31	1.11818	1.33875	17	0.835241
														12	32	2.95071	1.578	17	1.8699		7	32	1.53737	0.766303	12	2.00621
														12	33	3.9131	2.69551	20	1.45171		7	33	0.936088	1.11792	12	0.837346
														12	34	3.72956	2.82867	15	1.31849		7	34	1.76615	1.05943	12	1.66707
														12	35	0.961795	4.09527	15	0.234855		7	35	1.57548	1.30956	14	1.20306
														12	36	1.6012	3.97537	17	0.402778		7	36	0.595302	0.964582	14	0.617161
														12	37	1.28232	3.26347	22	0.392932		7	37	0.79002	1.35919	14	0.581245
														12	38	2.69533	2.75716	18	0.977575		7	38	1.43678	1.03784	11	1.38439
														12	39	3.61473	2.50758	19	1.44153		7	39	0.929503	0.980547	9	0.947944
														12	40	3.86026	2.72811	18	1.41499		7	40	1.03899	1.32413	17	0.784654
														12	41	5.20712	1.85841	20	2.80192		7	41	0.486897	1.06821	22	0.455808
														13	0	1.96975	2.79124	14	0.70569		7	42	1.10402	0.712651	15	1.54918
														13	1	1.80726	1.74721	9	1.03437		7	43	1.1178	1.28436	15	0.870315
														13	2	2.8626	2.08297	16	1.37429		7	44	1.43426	0.501239	13	2.86144
														13	3	1.18637	3.00015	12	0.395435		7	45	0.417298	1.55798	13	0.267845
														13	4	3.12523	1.55844	9	2.00536		7	46	0.441176	1.49311	15	0.295474
														13	5	3.87643	3.04051	16	1.27493		7	47	0.899492	1.30968	16	0.686801
														13	6	2.93886	2.68683	16	1.0938		7	48	0.652598	1.03683	16	0.629416
														13	7	1.88114	1.98428	16	0.948018		7	49	1.34406	1.09828	17	1.22378
														13	8	1.87423	2.3556	20	0.79565		7	50	1.1009	1.12134	13	0.981774
														13	9	4.07668	2.28466	11	1.78437		7	51	1.65545	1.0637	15	1.55632
														13	10	2.24907	1.84517	14	1.2189		7	52	0.827975	1.08052	11	0.766275
														13	11	2.35404	2.12499	12	1.10779		7	53	1.37632	1.18949	12	1.15706
														13	12	0.845137	1.97127	18	0.428728		7	54	0.928645	1.27011	9	0.731155
														13	13	2.81449	2.41289	53	1.16644		7	55	0.409861	1.33956	15	0.305968
														13	14	1.15724	2.48662	13	0.465387		7	56	0.654017	1.03936	14	0.629248
														13	15	3.32342	2.24527	11	1.48018		7	57	1.11218	0.94672	15	1.17477
														13	16	1.08966	2.32833	16	0.468		7	58	0.649771	1.05294	21	0.617104
														13	17	2.35218	2.60668	13	0.902366		7	59	1.18591	1.3571	11	0.873857
														13	18	0.749913	1.99399	18	0.376086		7	60	0.80175	0.904357	12	0.886541
														13	19	2.41908	1.79059	16	1.351		7	61	0.556023	1.24166	13	0.447806
														13	20	3.60928	2.25623	14	1.59969		7	62	0.818869	1.53218	23	0.534447
														13	21	2.66443	2.32767	16	1.14468		7	63	0.427619	2.00982	12	0.212765
														13	22	1.80318	2.80266	15	0.643381		7	64	-0.260795	1.45464	14	0.179285
														13	23	2.18159	2.01979	9	1.08011		7	65	0.536695	1.76322	18	0.304383
														13	24	1.28039	2.31995	12	0.551902		7	66	0.953907	0.87911	12	1.08508
														13	25	1.19827	2.40006	18	0.499267		7	67	0.451066	0.813334	19	0.55459
														13	26	3.13765	2.98242	14	1.05205		7	68	0.113546	1.40437	20	0.0808516
														13	27	4.16451	1.81821	19	2.29045		7	69	0.8191	1.60525	10	0.510262
														13	28	1.70792	2.99189	13	0.570851		7	70	0.870229	0.969116	12	0.897961
														13	29	0.0892139	2.72934	17	0.032687		7	71	-0.314885	1.29623	17	0.242925
														13	30	0.38343	3.28515	10	0.116716		8	0	0.558004	0.804423	22	0.69367
														13	31	1.47144	2.4528	15	0.599903		8	1	0.854045	0.752059	18	1.13561
														13	32	0.468427	3.10886	9	0.150675		8	2	0.82118	0.712344	16	1.15279
														13	33	1.84574	2.99239	12	0.616811		8	3	0.364295	0.651422	25	0.55923
														13	34	2.27454	2.91897	15	0.779227		8	4	0.179569	0.716267	21	0.250702
														13	35	1.77781	3.70373	17	0.480006		8	5	0.0745686	0.615525	12	0.121146
														13	36	0.470615	3.21048	17	0.146587		8	6	0.366171	0.760854	17	0.481264
														13	37	0.800994	3.20425	14	0.249979		8	7	0.474081	0.867497	16	0.546493
														13	38	1.44511	2.80554	15	0.515093		8	8	1.3438	0.873509	104	1.5384
														13	39	1.7232	2.84585	15	0.605511		8	9	1.08055	0.999548	11	1.08103
														13	40	2.22212	2.71437	17	0.818651		8	10	1.02164	0.623067	11	1.63969
														13	41	0.400794	2.41073	10	0.166254		8	11	0.967552	0.638917	15	1.51436
														14	0	1.31658	0.900785	12	1.46159		8	12	0.823816	0.712928	17	1.15554
														14	1	1.51054	1.13283	16	1.33342		8	13	0.589545	0.653357	17	0.902332
														14	2	1.22602	0.863742	11	1.41943		8	14	0.847775	0.59118	24	1.43404
														14	3	1.48239	0.830092	13	1.78581		8	15	0.603904	0.720733	20	0.837902
														14	4	1.16566	1.1852	10	0.983513		8	16	1.02008	0.711435	10	1.43384
														14	5	1.77681	1.01579	15	1.74919		8	17	1.51208	0.749524	18	2.01739
														14	6	2.35017	0.838287	14	2.80353		8	18	0.73741	0.585486	16	1.25948
														14	7	0.68241	0.896811	10	0.760929		8	19	1.25284	0.466615	14	2.68494
														14	8	0.980514	0.893603	14	1.09726		8	20	1.48811	0.462837	13	3.2152
														14	9	1.78771	1.22073	14	1.46446		8	21	1.17744	0.602148	16	1.9554
														14	10	1.77042	1.05691	12	1.6751		8	22	1.0655	0.527854	18	2.01855
														14	11	1.27909	0.859238	11	1.48864		8	23	1.07628	0.513223	19	2.0971
														14	12	1.87032	0.671415	15	2.78564		8	24	1.43284	0.602179	14	2.37943
														14	13	1.56529	0.833087	13	1.8789		8	25	0.924568	0.80784	19	1.14449
														14	14	1.79362	1.14029	53	1.57296		8	26	1.23231	0.84698	17	1.45495
														14	15	1.78073	1.01075	17	1.76179		8	27	1.30055	0.783871	19	1.65914
														14	16	1.3814	1.20403	18	1.14731		8	28	1.49474	0.714182	14	2.09294
														14	17	1.62324	0.834652	10	1.94481		8	29	1.15306	0.696743	16	1.65493
														14	18	1.30874	0.880674	16	1.48606		8	30	1.16445	0.598545	17	1.94546
														14	19	1.58179	0.821812	16	1.92476		8	31	1.00724	0.649442	16	1.55093
														14	20	1.8953	0.703149	15	2.69544		8	32	1.18198	0.688723	22	1.71619
														14	21	1.37289	1.35648	17	1.0121		8	33	0.700898	0.544219	17	1.2879
														14	22	0.894248	1.06898	13	0.83654		8	34	1.12734	0.849909	16	1.32643
														14	23	1.35001	1.35824	12	0.993941		8	35	0.808013	0.651132	17	1.24093
														14	24	1.68906	1.27702	18	1.32266		8	36	1.23864	0.591026	10	2.09574
														14	25	1.37177	1.45628	19	0.941968		8	37	1.00107	0.715756	12	1.39861
														14	26	1.86964	1.10853	12	1.68659		8	38	0.836642	0.832081	16	1.00548
														14	27	1.82061	0.945262	13	1.92604		8	39	0.923436	0.637028	15	1.4496
														14	28	1.21945	1.37708	17	0.885533		8	40	1.00211	0.558838	19	1.7932
														14	29	0.878968	2.09844	13	0.418867		8	41	0.953037	0.806289	23	1.182
														14	30	1.65722	1.09537	14	1.51292		8	42	0.74729	0.886247	17	0.843207
														14	31	2.44048	1.45259	17	1.68009		8	43	0.924421	0.662639	23	1.39506
														14	32	2.09494	1.13001	17	1.85391		8	44	0.678246	0.475883	20	1.42524
														14	33	2.3463	1.24023	12	1.89183		8	45	1.09077	0.828499	16	1.31656
														14	34	2.48833	1.12431	17	2.21321		8	46	1.34025	0.915606	16	1.46379
														14	35	0.805846	1.72844	19	0.466229		8	47	0.739142	0.888626	18	0.831781
														14	36	1.80357	1.56569	14	1.15193		8	48	0.943754	0.688908	15	1.36993
														14	37	2.16111	1.48233	15	1.45791		8	49	0.717651	0.663288	19	1.08196
														14	38	2.04624	1.37005	15	1.49356		8	50	0.754333	0.764736	12	0.986397
														14	39	2.10877	1.41683	9	1.48837		8	51	0.440401	0.9418	17	0.467616
														14	40	2.25502	1.30049	15	1.73398		8	52	0.473105	0.84079	15	0.56269
														14	41	2.18484	1.58583	13	1.37773		8	53	0.280557	0.492922	11	0.569171
														15	0	-0.366861	3.18315	14	0.115251		8	54	1.02563	0.921337	19	1.1132
														15	1	-0.204157	2.71454	20	0.0752087		8	55	0.391185	1.04606	13	0.373963
														15	2	0.990982	2.65518	14	0.373225		8	56	0.226922	0.945498	15	0.240003
														15	3	-0.111292	2.20232	17	0.050534		8	57	0.394267	0.761986	21	0.51742
														15	4	-0.0297192	2.68323	14	0.0110759		8	58	0.685279	0.581836	18	1.17779
														15	5	0.561653	2.51269	24	0.223526		8	59	0.234117	0.947292	16	0.247143
														15	6	0.915122	2.66985	24	0.342761		8	60	0.0733432	0.860519	14	0.0852313
														15	7	-0.732502	1.21325	22	0.603754		8	61	-0.193933	0.777611	17	0.249396
														15	8	-0.207106	1.53419	11	0.134994		8	62	0.13215	1.162	20	0.113726
														15	9	-0.304886	1.35914	19	0.224322		8	63	1.22188	0.845142	14	1.44577
														15	10	0.376659	1.83127	18	0.205682		8	64	0.422166	1.07445	12	0.392913
														15	11	0.595605	2.96028	14	0.201199		8	65	0.209935	0.911095	20	0.23042
														15	12	-0.11264	0.967466	15	0.116428		8	66	0.470915	0.899337	15	0.523625
														15	13	1.09401	1.60378	11	0.682146		8	67	0.029949	0.94836	22	0.0315798
														15	14	-0.807893	1.83637	17	0.43994		8	68	-0.309666	1.04984	17	0.294964
														15	15	0.90475	2.20578	64	0.410173		8	69	-0.19597	1.0509	20	0.186478
														15	16	1.76792	2.81302	19	0.628479		8	70	-0.46385	1.15967	18	0.399986
														15	17	0.609016	1.8807	14	0.323824		8	71	-0.0377117	0.694444	13	0.0543049
														15	18	0.878282	2.0207	24	0.434643		9	0	-2.22497	2.39341	20	0.929622
														15	19	0.775548	1.80738	18	0.4291		9	1	-2.07066	0.968911	12	2.1371
														15	20	0.855815	1.33264	21	0.642197		9	2	0.334162	1.51099	12	0.221155
														15	21	0.790226	2.0546	25	0.384612		9	3	0.0048831	2.17614	16	0.00224392
														15	22	1.59083	1.86512	20	0.852937		9	4	-1.4571	1.65706	17	0.879327
														15	23	0.557787	2.37273	16	0.235082		9	5	-1.47799	2.32736	12	0.635047
														15	24	0.673341	2.45131	24	0.274687		9	6	-1.31381	1.9167	14	0.685453
														15	25	0.674573	1.60169	15	0.421163		9	7	-1.3672	1.67974	19	0.813937
														15	26	0.53584	2.2219	19	0.241162		9	8	-1.87927	1.81061	11	1.03792
														15	27	0.0329974	1.60721	13	0.0205308		9	9	0.392713	1.77543	95	0.221193
														15	28	0.550058	2.20326	16	0.249657		9	10	-0.361566	1.32668	13	0.272535
														15	29	-0.243297	2.12794	14	0.114335		9	11	0.0978188	0.773494	10	0.126464
														15	30	0.744762	2.56688	8	0.290143		9	12	0.633593	1.52898	19	0.414389
														15	31	0.858048	2.59572	19	0.330563		9	13	-0.28387	1.72807	15	0.16427
														15	32	2.14534	3.04537	18	0.70446		9	14	-0.783611	1.78508	11	0.438978
														15	33	0.939801	1.79866	14	0.5225		9	15	-0.155334	1.20417	20	0.128997
														15	34	1.10925	2.02206	18	0.548575		9	16	-0.584155	0.925004	17	0.631517
														15	35	-1.24792	2.17006	14	0.575063		9	17	-0.725826	1.82622	13	0.397446
														15	36	1.52389	2.62668	19	0.580159		9	18	0.602758	1.97434	11	0.305296
														15	37	1.07134	2.38298	14	0.449581		9	19	0.801237	1.50368	19	0.532849
														15	38	0.696571	2.32568	17	0.299512		9	20	0.291087	0.982651	14	0.296226
														15	39	1.49584	2.59263	17	0.576958		9	21	-0.400858	0.626415	6	0.639923
														15	40	1.42269	2.76491	16	0.514554		9	22	-0.183588	1.31515	15	0.139595
														15	41	1.44022	2.42833	18	0.593093		9	23	-0.462816	1.46645	11	0.315603
														16	0	-2.40211	1.76826	13	1.35846		9	24	-0.205178	1.56327	17	0.131249
														16	1	-1.61722	1.90369	19	0.849516		9	25	0.192735	1.21732	15	0.158327
														16	2	-1.85458	1.63888	20	1.13162		9	26	-0.722848	1.58951	12	0.454761
														16	3	-2.04823	1.60126	18	1.27913		9	27	0.640566	1.39619	18	0.458797
														16	4	-2.15851	1.53777	16	1.40367		9	28	0.230841	1.42532	17	0.161958
														16	5	-2.16139	2.08663	16	1.03583		9	29	0.626716	1.37694	16	0.45515
														16	6	-1.6479	2.18073	18	0.755665		9	30	0.285281	1.69556	22	0.168251
														16	7	-0.950208	1.22487	21	0.77576		9	31	0.607982	1.34561	16	0.451826
														16	8	-1.8772	1.29238	22	1.45252		9	32	0.39003	1.44733	15	0.269482
														16	9	-1.76551	1.38129	9	1.27816		9	33	0.527853	1.57188	20	0.335809
														16	10	-1.57007	1.51057	14	1.03939		9	34	0.125862	2.24054	13	0.056175
														16	11	-1.9454	2.05066	15	0.948671		9	35	-0.198746	1.52115	16	0.130655
														16	12	-0.663589	1.16294	22	0.570611		9	36	0.993392	1.98494	23	0.500465
														16	13	-0.96061	1.11673	16	0.860201		9	37	1.27102	1.95193	12	0.651162
														16	14	-1.24701	1.36441	18	0.913956		9	38	0.569694	1.62183	12	0.351266
														16	15	-1.90395	2.40761	19	0.790808		9	39	-0.212663	1.60738	16	0.132304
														16	16	-0.639798	2.03233	62	0.31481		9	40	0.649706	2.01562	18	0.322335
														16	17	-1.05421	1.4878	14	0.708573		9	41	0.376917	1.82593	14	0.206425
														16	18	-1.86964	1.35335	21	1.38149		9	42	1.43722	1.50458	12	0.955228
														16	19	-0.35642	1.60076	17	0.222656		9	43	0.443735	1.47203	17	0.301445
														16	20	-0.471575	1.85043	15	0.254846		9	44	0.722323	1.48189	22	0.487434
														16	21	-1.18992	2.09382	18	0.568302		9	45	0.275237	2.60992	15	0.105458
														16	22	0.892657	2.05502	23	0.434379		9	46	1.07316	2.11806	16	0.506671
														16	23	-0.444953	2.44138	15	0.182255		9	47	1.83493	2.10378	13	0.872204
														16	24	0.130941	2.21894	17	0.0590107		9	48	0.121538	1.69215	13	0.0718247
														16	25	0.0895316	1.90254	18	0.0470589		9	49	0.132596	1.58812	10	0.0834925
														16	26	-0.567997	1.9098	12	0.297411		9	50	1.27194	2.38192	13	0.533998
														16	27	-0.824746	2.03507	8	0.405266		9	51	0.14115	2.23769	13	0.0630784
														16	28	-1.32494	2.57499	7	0.514544		9	52	-0.186572	1.19229	17	0.156482
														16	29	-0.363571	2.47273	21	0.147032		9	53	-0.357982	2.73111	13	0.131076
														16	30	0.824667	2.65891	10	0.310153		9	54	2.1404	1.13217	9	1.89053
														16	31	0.311601	2.11009	13	0.147672		9	55	1.28569	1.84065	15	0.698498
														16	32	-0.925704	2.3061	21	0.401414		9	56	0.922756	1.34833	16	0.684368
														16	33	0.719081	1.95517	12	0.367785		9	57	0.65568	2.05854	14	0.318517
														16	34	0.861435	1.99472	18	0.431858		9	58	0.386189	2.40238	17	0.160753
														16	35	0.342486	2.80623	17	0.122045		9	59	0.584305	2.12725	18	0.274676
														16	36	-0.986165	3.02601	19	0.325897		9	60	-0.544834	1.73312	16	0.314365
														16	37	0.470493	2.32524	21	0.202342		9	61	1.36992	2.40777	14	0.568959
														16	38	0.349936	2.27279	18	0.153967		9	62	0.793149	2.18097	13	0.363668
														16	39	1.27445	2.41867	19	0.52692		9	63	0.974632	0.698368	10	1.39559
														16	40	-0.0218734	2.37337	18	0.00921617		9	64	3.47434	2.29163	10	1.5161
														16	41	0.478637	1.86201	14	0.257053		9	65	1.85938	1.35773	21	1.36947
														17	0	-0.637496	2.05122	7	0.310789		9	66	0.107394	1.97346	16	0.0544191
														17	1	0.346413	1.67372	18	0.206972		9	67	0.756942	1.33889	15	0.565351
														17	2	-0.601902	1.70868	11	0.35226		9	68	0.649899	1.86687	19	0.348123
														17	3	-0.945265	1.93478	10	0.488566		9	69	0.456442	2.67048	20	0.170922
														17	4	-1.14973	1.77247	9	0.648663		9	70	1.60595	2.39412	21	0.670789
														17	5	-2.20977	1.49544	11	1.47767		9	71	2.12654	2.09664	10	1.01426
														17	6	-2.15387	1.37994	7	1.56084		10	0	0.067445	1.26807	11	0.0531872
														17	7	0.709508	1.03934	12	0.682655		10	1	0.182495	1.21095	20	0.150703
														17	8	0.520712	1.57098	15	0.331456		10	2	0.63018	1.15655	22	0.544879
														17	9	-0.25061	1.845	15	0.135831		10	3	1.09023	1.06769	17	1.02111
														17	10	0.210318	1.51675	10	0.138663		10	4	0.576849	1.25866	15	0.458303
														17	11	-0.683166	1.39216	7	0.490724		10	5	0.412644	0.974535	16	0.423427
														17	12	-0.544368	1.76721	11	0.308038		10	6	0.481739	1.10535	20	0.435825
														17	13	-1.98417	1.42984	13	1.38769		10	7	0.903747	1.20815	12	0.748044
														17	14	1.19516	1.37816	10	0.867217		10	8	1.04292	0.910388	11	1.14558
														17	15	0.862513	1.81399	14	0.475477		10	9	1.02507	1.61644	13	0.634152
														17	16	2.09746	1.31454	14	1.59558		10	10	1.29644	0.882268	92	1.46944
														17	17	1.13966	1.65696	47	0.687804		10	11	1.33462	0.77263	22	1.72737
														17	18	-0.810016	1.17283	6	0.690654		10	12	1.39945	0.751417	15	1.86242
														17	19	0.758453	0.925865	12	0.819183		10	13	1.26225	0.853314	16	1.47923
														17	20	0.302419	1.54427	15	0.195834		10	14	0.716076	1.08217	18	0.661705
														17	21	1.34355	1.63067	13	0.823926		10	15	0.902683	0.785431	8	1.14928
														17	22	2.51661	1.27674	15	1.97113		10	16	1.08947	1.12224	13	0.970799
														17	23	2.38499	1.76731	15	1.34951		10	17	0.907347	0.643384	11	1.41027
														17	24	1.37862	1.95393	16	0.705561		10	18	1.81726	0.739417	10	2.4577
														17	25	0.870563	1.7602	13	0.494582		10	19	1.2443	0.877785	16	1.41755
														17	26	0.837783	1.73972	14	0.481562		10	20	1.18223	0.587728	10	2.01153
														17	27	0.503764	1.64137	10	0.306918		10	21	1.5646	0.665929	12	2.3495
														17	28	1.34051	2.78534	15	0.481274		10	22	1.0181	0.547712	8	1.85883
														17	29	2.7185	2.12414	24	1.27982		10	23	1.03096	0.89236	17	1.15532
														17	30	1.81444	1.80438	11	1.00558		10	24	0.819635	1.05668	14	0.775671
														17	31	1.26589	1.63805	14	0.772801		10	25	1.37738	0.500379	11	2.75268
														17	32	1.44321	1.7173	13	0.840399		10	26	1.19243	1.34411	14	0.887153
														17	33	1.18324	2.0024	15	0.590909		10	27	1.0379	1.07992	16	0.961088
														17	34	1.15002	1.83549	13	0.62655		10	28	0.722837	1.21026	22	0.597257
														17	35	2.79884	2.77248	7	1.00951		10	29	0.892879	1.02458	13	0.87146
														17	36	2.40723	2.35824	17	1.02078		10	30	1.14671	0.645836	16	1.77554
														17	37	1.41117	1.72086	11	0.82004		10	31	1.25882	1.04193	12	1.20816
														17	38	2.23572	1.50431	14	1.48622		10	32	1.24068	1.16703	17	1.06311
														17	39	1.55819	1.10699	11	1.40759		10	33	0.842121	1.41532	20	0.595004
														17	40	2.39369	1.59741	15	1.49848		10	34	0.906381	0.943416	16	0.960743
														17	41	0.0315985	1.04995	14	0.0300951		10	35	0.814264	1.02929	16	0.791092
														18	0	2.70163	1.81045	18	1.49224		10	36	0.551876	1.23776	12	0.445867
														18	1	3.02094	1.80225	18	1.6762		10	37	1.35698	0.955287	24	1.4205
														18	2	3.00455	1.75945	18	1.70767		10	38	1.30931	0.777106	18	1.68485
														18	3	2.62792	1.48475	18	1.76994		10	39	1.28184	1.00866	15	1.27084
														18	4	1.60888	2.01825	14	0.797167		10	40	0.955703	1.25036	10	0.764344
														18	5	1.01343	1.53939	16	0.658335		10	41	0.980842	1.58039	18	0.620633
														18	6	0.37849	2.42519	14	0.156066		10	42	1.26481	1.38768	13	0.911459
														18	7	3.34807	1.2891	18	2.5972		10	43	1.2105	1.02239	17	1.18399
														18	8	3.28882	1.61094	21	2.04155		10	44	1.47296	1.14935	18	1.28156
														18	9	2.97084	1.26152	12	2.35496		10	45	0.984516	1.52463	13	0.645741
														18	10	1.95044	1.45385	15	1.34157		10	46	1.06672	1.33858	20	0.796901
														18	11	2.89357	1.7617	17	1.64249		10	47	1.22982	0.918068	15	1.33958
														18	12	1.51818	1.36722	19	1.11041		10	48	1.45083	1.20677	13	1.20225
														18	13	1.09614	1.66427	18	0.658633		10	49	0.672561	1.53323	15	0.438655
														18	14	3.27135	2.03167	16	1.61017		10	50	1.17906	0.901695	14	1.30761
														18	15	3.8337	1.4046	24	2.72939		10	51	1.14872	1.16052	11	0.989836
														18	16	4.65078	1.3298	21	3.49736		10	52	1.70317	1.05647	13	1.61214
														18	17	4.0963	1.93926	6	2.1123		10	53	1.61052	1.19395	17	1.3489
														18	18	3.73257	1.56586	60	2.38372		10	54	1.165	1.10824	12	1.05122
														18	19	2.22199	1.10862	17	2.00428		10	55	0.255182	1.59128	16	0.160363
														18	20	2.71842	1.75565	17	1.54838		10	56	0.669569	1.83466	11	0.364956
														18	21	4.12996	1.95556	17	2.11191		10	57	0.83352	1.14859	14	0.725692
														18	22	4.14944	1.32267	13	3.13717		10	58	1.83021	1.26078	16	1.45165
														18	23	4.74347	2.23989	15	2.11772		10	59	1.92367	1.17883	16	1.63185
														18	24	4.18718	1.49119	16	2.80795		10	60	1.45476	1.86316	9	0.780807
														18	25	4.23159	1.67294	13	2.52943		10	61	2.18244	1.4977	10	1.45719
														18	26	2.5296	1.52045	12	1.66371		10	62	1.14881	1.14816	14	1.00056
														18	27	1.60651	1.67102	15	0.961396		10	63	1.7042	1.23451	20	1.38047
														18	28	5.19172	1.9997	14	2.59624		10	64	1.01568	1.184	14	0.857843
														18	29	4.96626	2.03151	16	2.44462		10	65	1.27745	1.67075	16	0.764595
														18	30	4.58592	1.769	15	2.59237		10	66	1.72935	1.29361	21	1.33684
														18	31	3.39514	1.87447	17	1.81125		10	67	1.01785	1.17149	15	0.868851
														18	32	3.08649	1.46022	15	2.11372		10	68	1.42043	0.899132	17	1.57978
														18	33	2.56428	2.26913	12	1.13007		10	69	1.45554	1.3646	12	1.06665
														18	34	2.11688	2.28999	15	0.924403		10	70	2.18308	1.40815	20	1.55032
														18	35	5.04798	2.41291	17	2.09207		10	71	2.32945	1.20989	18	1.92534
														18	36	5.343	1.62815	15	3.28163		11	0	0.834074	1.6863	11	0.494617
														18	37	3.8155	2.02859	22	1.88086		11	1	0.153561	1.30683	14	0.117507
														18	38	3.75516	1.64726	17	2.27964		11	2	1.06009	1.39708	17	0.758791
														18	39	2.06721	1.74102	20	1.18736		11	3	2.06693	1.31624	14	1.57032
														18	40	0.726716	2.28461	10	0.318091		11	4	1.58351	1.10543	20	1.43248
														18	41	-0.145833	2.00525	17	0.0727257		11	5	1.84175	1.4347	21	1.28371
														19	0	-1.5212	2.28543	9	0.665608		11	6	1.52486	1.51258	18	1.00812
														19	1	-1.96631	2.39317	9	0.821632		11	7	1.19669	1.90982	7	0.626598
														19	2	-0.8193	2.02005	22	0.405584		11	8	1.51596	1.97981	15	0.765709
														19	3	-2.08658	2.67422	13	0.78026		11	9	1.49787	1.70421	10	0.878923
														19	4	-3.18131	2.8677	14	1.10936		11	10	0.59371	1.06681	22	0.55653
														19	5	-1.35271	2.98989	14	0.452427		11	11	1.08577	1.43	95	0.759279
														19	6	-3.11427	2.73011	14	1.14071		11	12	2.9196	1.09479	15	2.66682
														19	7	1.71087	1.84856	15	0.925517		11	13	1.22094	1.39762	13	0.873579
														19	8	0.699797	2.26046	15	0.309582		11	14	0.824233	1.535	13	0.53696
														19	9	2.20413	1.86776	14	1.18009		11	15	0.564555	1.50507	14	0.375101
														19	10	0.253654	2.16506	17	0.117158		11	16	0.774109	1.55549	16	0.497663
														19	11	0.811223	2.53264	13	0.320307		11	17	0.600198	1.16416	18	0.515561
														19	12	-1.38509	2.50548	14	0.552823		11	18	0.30561	1.5104	18	0.202338
														19	13	-1.40534	1.91801	16	0.732707		11	19	0.575534	1.3923	21	0.41337
														19	14	2.33348	2.7457	16	0.849866		11	20	0.615592	1.31983	9	0.466419
														19	15	1.54485	2.85903	18	0.540341		11	21	0.608874	1.33627	9	0.455652
														19	16	1.56492	3.54349	17	0.441633		11	22	0.491244	1.65002	17	0.29772
														19	17	2.29481	1.49194	12	1.53814		11	23	0.380272	1.59486	13	0.238437
														19	18	-0.543076	1.86226	17	0.291623		11	24	1.0142	1.34985	21	0.751342
														19	19	1.06246	2.40174	55	0.442372		11	25	0.612756	1.05355	11	0.581611
														19	20	1.04161	2.63979	17	0.394582		11	26	0.937549	1.52677	10	0.614075
														19	21	0.840093	2.54009	23	0.330734		11	27	-0.123454	1.36539	16	0.0904167
														19	22	2.87925	2.72553	22	1.0564		11	28	-0.115932	0.78705	12	0.1473
														19	23	0.56252	3.49836	14	0.160795		11	29	0.0456021	1.65497	19	0.0275546
														19	24	2.26124	1.98079	12	1.14158		11	30	0.26454	1.39328	21	0.189868
														19	25	2.48688	2.40024	15	1.0361		11	31	-0.399271	1.69486	22	0.235577
														19	26	0.318231	2.46648	14	0.129023		11	32	-1.05583	1.57904	14	0.668651
														19	27	0.302201	2.44329	14	0.123686		11	33	0.42102	1.53809	11	0.273728
														19	28	1.60483	2.82718	11	0.567642		11	34	0.315561	1.75407	17	0.179902
														19	29	2.52668	3.1044	19	0.813904		11	35	0.762102	1.56346	16	0.487445
														19	30	0.628147	3.40804	10	0.184313		11	36	0.475376	1.80801	12	0.262927
														19	31	0.636214	2.4879	19	0.255723		11	37	-1.06042	1.52197	15	0.696738
														19	32	1.67898	3.1219	10	0.537808		11	38	-1.20001	1.46058	16	0.8216
														19	33	1.57595	2.26982	18	0.694306		11	39	-1.23862	1.57062	20	0.788619
														19	34	0.711724	1.88669	12	0.377235		11	40	-0.259622	1.8773	11	0.138296
														19	35	2.81639	3.76485	16	0.748073		11	41	-0.281186	1.45355	15	0.193448
														19	36	0.354474	3.30007	11	0.107414		11	42	-0.0457089	1.62826	17	0.0280723
														19	37	1.26265	2.35468	14	0.536232		11	43	-0.115662	1.29745	13	0.0891457
														19	38	1.21385	2.63912	10	0.459944		11	44	0.316383	1.45708	16	0.217136
														19	39	1.9201	2.028	15	0.946795		11	45	-1.56413	1.60363	13	0.975371
														19	40	-0.191451	3.35178	17	0.0571192		11	46	-1.66082	2.45881	19	0.675457
														19	41	0.615209	3.56508	13	0.172565		11	47	-0.743115	1.32092	14	0.562576
														20	0	-1.42458	1.42903	14	0.996885		11	48	-0.941927	1.07704	13	0.87455
														20	1	-0.983862	1.77754	20	0.553495		11	49	-0.466823	1.02689	16	0.454599
														20	2	-1.2348	1.49743	22	0.824617		11	50	-0.129494	1.53632	15	0.0842882
														20	3	-0.948897	1.28848	12	0.736447		11	51	-0.528926	1.16558	10	0.453789
														20	4	-1.5459	1.01152	6	1.5283		11	52	-0.727571	1.62967	18	0.446453
														20	5	-1.82243	2.12035	18	0.859496		11	53	-0.534131	1.60402	15	0.332996
														20	6	-3.00816	2.0389	17	1.47538		11	54	-0.676497	2.18635	13	0.309419
														20	7	-0.0354421	1.50226	19	0.0235925		11	55	-2.53005	1.41032	17	1.79395
														20	8	-1.08041	1.99582	11	0.541336		11	56	-0.269564	1.62894	15	0.165484
														20	9	-1.16699	1.79195	22	0.651239		11	57	-0.958981	2.10286	7	0.456037
														20	10	-2.08	1.73743	14	1.19717		11	58	-0.64931	2.33232	12	0.278396
														20	11	-1.92649	1.35031	19	1.42671		11	59	-1.23083	1.68959	14	0.728476
														20	12	-2.54028	1.50267	17	1.69051		11	60	-0.544272	0.851793	14	0.638973
														20	13	-3.44491	1.00872	14	3.41513		11	61	-1.52603	2.48498	15	0.6141
														20	14	-0.136759	1.42184	15	0.0961849		11	62	0.0667731	1.96392	16	0.0339999
														20	15	0.0247206	1.95992	21	0.012613		11	63	-0.726949	1.65242	12	0.439931
														20	16	-1.06572	1.93567	15	0.550569		11	64	-1.76728	3.11494	10	0.567354
														20	17	-0.585854	2.22902	15	0.262831		11	65	-1.35769	1.81143	10	0.749511
														20	18	-0.999139	1.6995	17	0.5879		11	66	-1.26409	1.47737	14	0.855635
														20	19	-1.32243	1.21735	17	1.08631		11	67	-0.306668	1.55424	17	0.197311
														20	20	-0.631372	1.61388	62	0.391213		11	68	-0.211506	1.85765	16	0.113857
														20	21	-0.47869	1.90037	18	0.251893		11	69	-1.12947	2.23051	13	0.506373
														20	22	0.650897	2.24587	13	0.28982		11	70	-1.64387	1.43982	12	1.14172
														20	23	0.653507	2.43995	13	0.267836		11	71	-1.91604	1.93934	15	0.987986
														20	24	1.74996	2.40419	17	0.727879		12	0	-4.5026	0.905884	13	4.9704
														20	25	0.560366	2.02943	22	0.27612		12	1	-4.68747	1.26102	16	3.7172
														20	26	-0.022158	1.63377	23	0.0135625		12	2	-4.77671	0.939987	17	5.08168
														20	27	0.254253	1.38633	18	0.183401		12	3	-3.63076	1.05571	13	3.43915
														20	28	1.02804	2.42269	13	0.42434		12	4	-2.68514	1.67635	14	1.60178
														20	29	1.78184	2.8921	22	0.616106		12	5	-3.91342	1.52774	17	2.56157
														20	30	1.38671	1.6408	9	0.845143		12	6	-3.42327	1.45484	17	2.35302
														20	31	0.260888	1.96481	21	0.132781		12	7	-5.60872	1.58602	12	3.53634
														20	32	-0.605826	2.36893	19	0.255738		12	8	-3.30096	1.61079	17	2.04928
														20	33	0.656976	1.4876	15	0.441633		12	9	-4.16498	1.1457	19	3.6353
														20	34	0.711132	1.60262	12	0.44373		12	10	-3.29917	1.11459	15	2.95997
														20	35	3.88228	3.22809	14	1.20265		12	11	-4.56549	0.964384	15	4.7341
														20	36	2.13091	2.41463	19	0.8825		12	12	-3.1638	1.44548	98	2.18875
														20	37	1.65778	2.94598	18	0.562724		12	13	-3.19564	1.11566	17	2.86436
														20	38	0.604619	2.59978	21	0.232565		12	14	-3.33613	1.00803	11	3.30957
														20	39	1.33231	1.81659	14	0.73341		12	15	-4.15421	1.35576	17	3.06411
														20	40	1.09908	2.59861	18	0.422949		12	16	-3.64769	0.960356	11	3.79827
														20	41	-1.22231	1.98296	18	0.616407		12	17	-3.63233	2.83837	7	1.27973
														21	0	0.0438106	1.73498	11	0.0252513		12	18	-4.14529	1.39913	13	2.96276
														21	1	-0.313339	1.06312	24	0.294735		12	19	-3.26994	1.3893	9	2.35367
														21	2	-0.348417	1.07712	19	0.323471		12	20	-3.50375	1.37566	14	2.54695
														21	3	0.016305	1.20468	17	0.0135347		12	21	-4.26032	2.26536	11	1.88064
														21	4	0.253512	1.16745	15	0.217151		12	22	-2.49401	1.69892	14	1.46799
														21	5	0.750095	1.10889	23	0.676438		12	23	-3.17446	1.41851	16	2.23788
														21	6	1.81595	0.900813	17	2.0159		12	24	-3.12964	1.82308	10	1.71668
														21	7	-0.89337	0.849348	17	1.05183		12	25	-3.17212	1.95308	23	1.62417
														21	8	-0.985863	1.06082	25	0.929341		12	26	-3.34189	1.76118	14	1.89753
														21	9	-0.660794	1.13785	23	0.58074		12	27	-3.48179	1.66304	16	2.09363
														21	10	-0.285323	0.910316	9	0.313432		12	28	-3.40414	1.8782	13	1.81245
														21	11	0.0503827	1.25718	19	0.040076		12	29	-3.79018	1.13287	18	3.34564
														21	12	-0.144043	1.26354	20	0.114		12	30	-2.84867	1.55831	15	1.82805
														21	13	0.295278	1.24044	16	0.238044		12	31	-3.40125	1.91076	17	1.78005
														21	14	-2.02847	1.12863	17	1.79729		12	32	-2.98337	1.02361	18	2.91455
														21	15	-1.86795	1.27975	25	1.45962		12	33	-2.90108	1.17005	17	2.47944
														21	16	-1.51155	1.21722	18	1.24181		12	34	-3.30861	1.72761	23	1.91513
														21	17	-1.99162	1.07914	13	1.84557		12	35	-3.20092	1.26857	19	2.52325
														21	18	-0.986874	0.724855	17	1.36148		12	36	-2.97139	1.28085	13	2.31986
														21	19	-0.524481	0.917888	23	0.571399		12	37	-2.95105	1.80953	13	1.63084
														21	20	-0.453246	1.15291	18	0.393132		12	38	-2.7954	1.37502	16	2.03299
														21	21	-2.21207	1.41903	71	1.55887		12	39	-2.5288	1.2413	9	2.03721
														21	22	-2.77043	1.27069	23	2.18025		12	40	-3.75004	1.38646	17	2.70475
														21	23	-3.04637	1.18763	24	2.56509		12	41	-2.63692	1.36045	14	1.93827
														21	24	-2.31338	1.02086	22	2.2661		12	42	-3.26334	2.14668	16	1.52018
														21	25	-1.8933	1.13632	17	1.66617		12	43	-3.22443	1.53872	14	2.09553
														21	26	-1.14544	1.20212	21	0.95285		12	44	-2.652	1.61196	16	1.6452
														21	27	-0.867795	0.934335	22	0.928784		12	45	-2.63111	1.77019	14	1.48635
														21	28	-4.91828	1.12209	20	4.38314		12	46	-2.66091	1.84619	19	1.4413
														21	29	-3.91652	1.24049	15	3.15725		12	47	-2.54875	1.31983	13	1.93112
														21	30	-2.49702	1.20524	18	2.07181		12	48	-2.78673	1.84244	9	1.51252
														21	31	-2.14383	1.13884	17	1.88246		12	49	-2.66267	1.40652	16	1.89309
														21	32	-1.56774	0.951808	15	1.64712		12	50	-3.09132	1.61467	14	1.91452
														21	33	-1.44697	1.03155	22	1.40271		12	51	-3.45297	1.4835	15	2.32758
														21	34	0.0391717	1.16943	17	0.0334965		12	52	-3.52626	1.36442	13	2.58443
														21	35	-4.78324	1.32276	21	3.61612		12	53	-2.61808	1.38022	18	1.89686
														21	36	-3.7475	1.59495	21	2.34961		12	54	-3.30078	1.90864	19	1.72939
														21	37	-3.11541	1.16634	16	2.67109		12	55	-2.76336	2.16822	9	1.27448
														21	38	-2.28042	1.26509	22	1.80257		12	56	-2.85199	1.70072	17	1.67693
														21	39	-1.41627	1.15071	19	1.23079		12	57	-2.49373	1.78744	15	1.39515
														21	40	-1.9807	1.10772	22	1.78808		12	58	-2.1095	2.01395	16	1.04745
														21	41	-0.137226	1.39352	21	0.098474		12	59	-2.64638	1.78527	16	1.48234
														22	0	-2.03521	2.07192	14	0.982284		12	60	-3.6541	1.17886	14	3.09969
														22	1	-1.88767	1.32594	20	1.42365		12	61	-3.34045	1.92343	14	1.73671
														22	2	-2.38664	1.43491	22	1.66327		12	62	-2.41388	1.98109	14	1.21846
														22	3	-2.04848	1.73887	20	1.17806		12	63	-3.57741	1.69834	18	2.10642
														22	4	-0.741037	1.49894	14	0.494374		12	64	-2.97832	1.74848	17	1.70337
														22	5	-2.69392	1.59144	14	1.69276		12	65	-1.93313	1.54372	19	1.25225
														22	6	-2.11781	1.78303	25	1.18776		12	66	-3.28482	1.36385	18	2.40848
														22	7	-1.7193	1.52971	19	1.12394		12	67	-2.01279	1.37037	16	1.46879
														22	8	-2.42966	1.71779	20	1.41441		12	68	-3.56663	1.67476	18	2.12963
														22	9	-1.74161	1.45593	12	1.19622		12	69	-2.60863	1.53843	21	1.69565
														22	10	-2.06868	1.37643	26	1.50294		12	70	-2.8184	2.09071	12	1.34806
														22	11	-2.36567	1.40478	13	1.68402		12	71	-3.57887	1.68697	18	2.12148
														22	12	-2.2156	1.22686	19	1.80591		13	0	-0.613236	2.2781	11	0.269187
														22	13	-2.42215	1.22876	15	1.97122		13	1	-1.43615	2.31405	7	0.620625
														22	14	-2.24963	1.65194	13	1.36181		13	2	-1.11235	2.54609	12	0.436885
														22	15	-2.29705	2.04246	20	1.12465		13	3	1.10919	1.51297	15	0.733121
														22	16	-2.90149	1.90948	23	1.51952		13	4	1.18989	2.47664	7	0.480443
														22	17	-2.67875	1.07499	15	2.49188		13	5	0.0851618	2.30004	19	0.0370262
														22	18	-3.15471	1.12154	13	2.81283		13	6	0.0129407	2.34569	18	0.00551679
														22	19	-2.95857	1.36207	22	2.17212		13	7	-0.778939	2.70654	8	0.287799
														22	20	-2.68226	1.50737	13	1.77943		13	8	0.0104925	2.16701	17	0.00484192
														22	21	-0.825981	1.67206	23	0.493992		13	9	-0.809636	2.14848	15	0.376841
														22	22	-2.50933	2.2327	65	1.1239		13	10	-0.784785	2.37649	16	0.330229
														22	23	-2.06462	2.85612	9	0.722877		13	11	-0.336234	2.4276	13	0.138505
														22	24	-3.27114	1.73754	16	1.88263		13	12	1.07847	1.63136	17	0.661087
														22	25	-3.77293	1.55949	16	2.41933		13	13	-0.274681	2.01963	89	0.136006
														22	26	-3.02667	1.74377	14	1.73571		13	14	-1.01376	1.63529	12	0.619926
														22	27	-2.95103	1.40841	17	2.09529		13	15	-0.809883	1.95976	20	0.413255
														22	28	-2.5826	2.61459	16	0.987764		13	16	-0.453773	2.43517	11	0.186341
														22	29	-3.57469	2.6085	21	1.3704		13	17	0.0524946	1.9792	14	0.0265231
														22	30	-3.75455	1.88212	19	1.99485		13	18	-0.448396	2.55076	12	0.175789
														22	31	-3.04141	1.90448	19	1.59698		13	19	-1.6349	2.47456	19	0.660682
														22	32	-3.53361	1.79894	13	1.96427		13	20	-1.79047	1.67483	11	1.06905
														22	33	-4.41753	2.01889	13	2.18811		13	21	-2.37741	2.01648	13	1.17899
														22	34	-3.68731	1.67741	26	2.19822		13	22	-1.5621	2.21989	9	0.703686
														22	35	-4.01585	3.11852	22	1.28774		13	23	-2.36282	1.19933	15	1.97012
														22	36	-3.35894	2.42265	18	1.38647		13	24	-2.09959	1.58337	9	1.32603
														22	37	-3.3979	2.86921	16	1.18426		13	25	-1.48029	1.70224	14	0.869617
														22	38	-3.0812	1.95292	18	1.57774		13	26	-0.444546	2.02566	18	0.219457
														22	39	-4.51709	2.26777	21	1.99186		13	27	-1.23803	2.28114	15	0.542726
														22	40	-4.56688	1.79723	15	2.54107		13	28	-0.608094	2.18739	13	0.278
														22	41	-4.2721	2.13962	11	1.99667		13	29	-1.43902	3.00889	13	0.478257
														23	0	-2.59055	2.49651	8	1.03767		13	30	-1.20585	1.46348	12	0.823961
														23	1	-2.15651	1.57212	19	1.37172		13	31	-0.174983	2.04459	11	0.0855835
														23	2	-1.96581	1.4094	14	1.39478		13	32	-0.895498	2.02485	16	0.442253
														23	3	-2.2766	1.43059	13	1.59138		13	33	-0.783538	2.05181	11	0.381877
														23	4	-2.23713	1.87099	10	1.19569		13	34	-0.670837	1.58168	11	0.42413
														23	5	-3.31075	1.79269	11	1.84681		13	35	0.302507	1.68888	14	0.179117
														23	6	-4.01506	1.79155	12	2.24111		13	36	-1.28294	1.71777	14	0.746861
														23	7	-2.15159	2.07622	12	1.0363		13	37	-0.0816376	3.01347	14	0.0270909
														23	8	-1.92212	1.54774	13	1.24189		13	38	-1.39708	3.05534	13	0.457257
														23	9	-1.85199	2.08733	16	0.887252		13	39	-0.960383	3.08093	9	0.311719
														23	10	-3.15079	1.6199	7	1.94506		13	40	-0.317911	2.38436	13	0.133332
														23	11	-2.56304	1.96822	11	1.30221		13	41	-0.396143	2.52075	10	0.157153
														23	12	-3.10352	1.21818	14	2.54767		13	42	0.230787	2.27683	15	0.101363
														23	13	-2.68941	1.53141	9	1.75617		13	43	-0.413566	2.37058	20	0.174458
														23	14	-2.72098	1.003	12	2.71283		13	44	0.330104	2.46361	20	0.133992
														23	15	-1.65774	2.06053	16	0.804522		13	45	-0.627307	1.99147	8	0.314997
														23	16	-1.89342	1.37677	15	1.37526		13	46	-0.319224	2.16362	16	0.147542
														23	17	-1.88799	1.49847	15	1.25994		13	47	1.32472	2.48526	13	0.533031
														23	18	-2.85004	1.53892	15	1.85198		13	48	0.527722	2.45963	15	0.214554
														23	19	-1.61903	1.7499	14	0.925211		13	49	-0.202223	1.40869	17	0.143554
														23	20	-1.57261	2.4492	13	0.642091		13	50	0.736693	2.19519	17	0.335595
														23	21	-0.818688	1.50389	24	0.54438		13	51	0.218678	2.10914	10	0.103681
														23	22	-0.321237	1.2583	9	0.255294		13	52	-0.204338	2.27502	11	0.0898184
														23	23	-0.879045	2.09265	48	0.420064		13	53	0.713999	3.24908	9	0.219755
														23	24	-1.64295	1.92074	19	0.855374		13	54	-1.38449	3.20494	13	0.431987
														23	25	-0.945546	2.41779	16	0.391079		13	55	-0.0971105	1.88656	12	0.051475
														23	26	-1.22846	1.90416	9	0.645144		13	56	1.468	1.99501	16	0.735833
														23	27	-2.1501	1.84723	10	1.16396		13	57	0.263471	1.85959	17	0.141682
														23	28	-2.27982	2.9724	6	0.766996		13	58	-1.16693	2.4094	11	0.484324
														23	29	-0.757871	2.43363	19	0.311416		13	59	0.715821	2.13464	20	0.335336
														23	30	-0.825494	3.03873	10	0.271657		13	60	0.88478	2.78027	11	0.318235
														23	31	-1.69196	1.5126	17	1.11858		13	61	0.632354	3.15794	13	0.200242
														23	32	-1.00791	1.96866	12	0.511979		13	62	-0.72111	2.17375	14	0.331736
														23	33	-0.355421	3.14576	12	0.112984		13	63	-0.303737	2.91244	15	0.10429
														23	34	-2.99697	1.95403	11	1.53374		13	64	-0.975083	2.57198	15	0.379117
														23	35	-0.165659	2.47497	18	0.0669336		13	65	-0.611496	2.31635	17	0.263991
														23	36	-0.735501	1.26483	9	0.581501		13	66	-0.446961	2.21189	17	0.202072
														23	37	-0.817939	1.88949	10	0.432889		13	67	0.16456	2.67602	14	0.0614943
														23	38	-1.06772	3.55507	10	0.300339		13	68	-0.247516	1.796	22	0.137815
														23	39	-1.37228	1.87738	13	0.730957		13	69	0.429485	2.82899	14	0.151816
														23	40	-0.0438356	2.3071	15	0.0190003		13	70	0.131494	3.59393	11	0.0365877
														23	41	-0.223468	2.93163	10	0.0762264		13	71	3.17352	2.57998	15	1.23006
														24	0	3.18258	1.6661	13	1.9102		14	0	-1.24946	2.96436	14	0.421493
														24	1	2.78487	1.40259	13	1.98552		14	1	-1.66986	2.01438	15	0.828968
														24	2	1.12663	1.2766	14	0.882521		14	2	-1.0955	2.27822	15	0.480857
														24	3	1.38121	1.48528	14	0.92993		14	3	1.41527	1.77532	17	0.797192
														24	4	1.5765	1.56741	16	1.0058		14	4	0.242896	1.82043	9	0.133427
														24	5	1.83952	1.67256	18	1.09982		14	5	0.600256	3.34355	15	0.179527
														24	6	1.08087	1.24404	20	0.868841		14	6	0.877949	2.77821	16	0.316013
														24	7	0.879599	1.47699	19	0.595534		14	7	-2.59798	2.7426	8	0.947268
														24	8	0.0998628	1.44508	16	0.0691053		14	8	-1.37121	2.79365	24	0.490832
														24	9	-0.112486	1.73536	27	0.06482		14	9	0.590117	2.12989	11	0.277065
														24	10	-0.644927	1.5201	17	0.424266		14	10	-0.154862	1.79766	18	0.0861466
														24	11	-0.675899	1.4015	16	0.482268		14	11	0.119584	1.91897	13	0.0623167
														24	12	-0.2157	1.46676	17	0.147059		14	12	2.25245	1.27927	11	1.76073
														24	13	-0.480001	1.33947	12	0.358351		14	13	2.00322	2.08626	12	0.9602
														24	14	0.27757	1.87904	18	0.147719		14	14	0.619288	2.42914	92	0.254941
														24	15	-0.484466	1.92548	24	0.251608		14	15	-1.20815	2.48457	15	0.486263
														24	16	-0.17375	1.51911	17	0.114376		14	16	-0.0964436	1.92539	11	0.0500903
														24	17	-0.569591	2.01902	16	0.282113		14	17	-0.885962	2.30439	16	0.384467
														24	18	-2.44893	1.4949	16	1.63819		14	18	-0.569205	2.96532	13	0.191954
														24	19	-0.101894	1.18543	12	0.0859559		14	19	-0.47899	1.69207	5	0.28308
														24	20	-0.908508	1.91831	17	0.473598		14	20	0.749371	1.77125	14	0.423074
														24	21	0.963722	1.5692	22	0.61415		14	21	0.410443	2.52994	17	0.162234
														24	22	1.25862	1.61806	16	0.777861		14	22	1.76587	2.8235	14	0.625418
														24	23	0.176328	2.237	19	0.0788236		14	23	-2.30639	1.97737	11	1.16639
														24	24	-0.126232	1.82963	66	0.0689931		14	24	-0.710491	3.06505	12	0.231804
														24	25	0.164152	1.95701	22	0.0838791		14	25	-0.968283	1.87378	10	0.516753
														24	26	-0.227343	1.68529	25	0.134899		14	26	-1.20182	1.52024	11	0.790545
														24	27	0.323625	1.83501	18	0.176361		14	27	1.70184	2.37224	12	0.7174
														24	28	0.48636	2.40202	19	0.202479		14	28	0.7796	2.43608	18	0.320023
														24	29	0.293621	2.53958	20	0.115618		14	29	0.990308	2.70062	18	0.366696
														24	30	-0.903293	2.0302	20	0.444927		14	30	1.44302	2.83812	15	0.508443
														24	31	0.373387	1.82371	21	0.20474		14	31	-0.0826746	1.85166	7	0.0446489
														24	32	0.352481	1.77919	14	0.198113		14	32	1.12623	2.48234	10	0.453696
														24	33	-0.436964	2.08089	17	0.209989		14	33	0.970201	1.65405	15	0.58656
														24	34	-1.02084	2.23767	16	0.456208		14	34	-0.101068	3.18312	15	0.0317513
														24	35	2.90109	2.31681	21	1.25219		14	35	0.112466	2.31417	21	0.0485989
														24	36	-0.353734	2.29156	22	0.154364		14	36	1.7161	2.34257	12	0.732573
														24	37	-0.237121	2.0403	19	0.116219		14	37	2.01322	3.24865	14	0.61971
														24	38	-1.00256	2.26144	15	0.443326		14	38	1.23581	2.2291	14	0.554397
														24	39	-1.01967	2.20552	18	0.462328		14	39	1.60354	2.94252	14	0.544954
														24	40	-0.208778	2.3145	16	0.0902045		14	40	0.690866	3.61491	11	0.191116
														24	41	-0.444985	1.43345	14	0.310429		14	41	0.653907	2.66308	16	0.245546
														25	0	-1.60824	1.71365	11	0.938492		14	42	0.715206	2.43227	15	0.294049
														25	1	-0.766919	1.85178	18	0.414152		14	43	0.120443	2.41264	16	0.0499218
														25	2	-0.719695	1.73019	15	0.415962		14	44	0.0482888	2.00656	12	0.0240655
														25	3	-1.72125	2.5042	11	0.687345		14	45	1.22514	3.72559	13	0.328844
														25	4	-2.68431	1.27645	13	2.10296		14	46	0.909229	2.77505	15	0.327644
														25	5	-2.22163	1.64369	14	1.35162		14	47	2.10274	3.00205	18	0.700436
														25	6	-0.20825	1.85342	12	0.112359		14	48	-0.261799	3.33441	12	0.0785143
														25	7	-1.06896	1.67903	16	0.636654		14	49	1.1001	3.1296	18	0.351515
														25	8	-1.28731	1.9017	11	0.676926		14	50	-0.383525	2.38388	12	0.160883
														25	9	-1.16828	2.47641	18	0.471763		14	51	-1.06902	3.35715	12	0.31843
														25	10	-0.616903	1.10607	16	0.557743		14	52	-0.271437	2.94514	13	0.0921644
														25	11	-1.84937	1.87296	15	0.987404		14	53	-0.775387	3.58737	21	0.216144
														25	12	-0.730178	1.88338	20	0.387695		14	54	1.4588	3.20008	19	0.455863
														25	13	-0.652663	2.04945	18	0.318457		14	55	2.16751	2.63647	16	0.822126
														25	14	-0.273119	2.11141	19	0.129354		14	56	1.04512	2.66454	15	0.392232
														25	15	-0.0699535	2.08883	15	0.0334892		14	57	0.412949	1.98903	21	0.207613
														25	16	-0.748703	1.93686	18	0.386556		14	58	0.909164	2.40393	18	0.378199
														25	17	-0.161327	1.57484	13	0.102441		14	59	0.0189768	3.0393	12	0.00624379
														25	18	-1.53307	0.940252	13	1.63048		14	60	-0.87178	2.00588	11	0.434612
														25	19	-1.91264	1.54405	15	1.23872		14	61	0.121861	3.20689	19	0.0379997
														25	20	0.0172745	1.53	22	0.0112905		14	62	-0.45475	2.90834	12	0.156361
														25	21	-0.0133326	2.24662	17	0.00593453		14	63	0.928466	3.46573	14	0.267899
														25	22	-1.1919	1.92816	16	0.618151		14	64	0.715202	2.2992	7	0.311066
														25	23	-1.21092	2.1406	16	0.565694		14	65	-0.670257	2.77776	21	0.241295
														25	24	-0.556015	1.81657	22	0.30608		14	66	0.424362	2.03337	17	0.208699
														25	25	-0.925623	1.89371	59	0.488788		14	67	-0.501004	2.85635	10	0.1754
														25	26	-0.773402	2.76114	15	0.280102		14	68	0.513463	2.77691	22	0.184904
														25	27	-1.02299	1.88235	16	0.543467		14	69	-0.486075	2.85656	9	0.170161
														25	28	-1.40514	1.79072	14	0.784678		14	70	-1.31739	3.54388	18	0.371735
														25	29	-1.6067	1.94131	17	0.827638		14	71	0.0913126	4.81834	15	0.018951
														25	30	-1.72485	1.95271	11	0.883312		15	0	0.30581	1.93528	11	0.158018
														25	31	-0.478725	1.91952	23	0.249398		15	1	-0.430543	2.3486	18	0.183319
														25	32	-1.1172	1.89021	21	0.591047		15	2	0.0100282	1.91097	17	0.00524772
														25	33	-1.49665	2.16074	16	0.692656		15	3	0.577629	1.7273	18	0.334411
														25	34	-0.9115	1.69671	17	0.537216		15	4	0.815406	1.62532	16	0.501689
														25	35	-1.12352	2.50281	16	0.448905		15	5	-0.660219	2.61308	20	0.252659
														25	36	0.745809	2.06774	15	0.360688		15	6	-0.548338	2.05036	22	0.267435
														25	37	-1.86666	1.51692	13	1.23056		15	7	-0.203187	1.41706	19	0.143386
														25	38	-0.938012	1.78371	17	0.525877		15	8	0.263725	2.68763	20	0.0981258
														25	39	-0.998317	2.48342	18	0.401993		15	9	-0.569697	2.07274	20	0.274852
														25	40	0.0235591	1.60549	14	0.014674		15	10	0.0919974	2.07824	8	0.0442671
														25	41	0.0432938	1.95553	12	0.0221392		15	11	0.35911	2.50769	14	0.143203
														26	0	-1.06593	1.60098	15	0.665799		15	12	1.84899	1.43507	17	1.28843
														26	1	-0.237206	1.45602	16	0.162914		15	13	0.794078	1.51228	20	0.525085
														26	2	-0.285959	1.43109	17	0.199818		15	14	0.855009	2.44229	15	0.350085
														26	3	-1.45556	1.10048	12	1.32266		15	15	0.834785	1.86473	97	0.44767
														26	4	-0.595821	1.74379	14	0.341681		15	16	1.18934	1.34613	12	0.883528
														26	5	0.938123	1.73887	15	0.539502		15	17	1.10567	2.15742	19	0.512498
														26	6	0.191327	1.54848	14	0.123558		15	18	1.39198	2.59558	17	0.536287
														26	7	-0.239655	1.67936	16	0.142706		15	19	1.88554	1.97266	11	0.955833
														26	8	-0.765602	1.39556	14	0.548596		15	20	1.16006	1.70674	14	0.679694
														26	9	-0.740307	1.82671	21	0.405269		15	21	2.28985	1.35762	16	1.68666
														26	10	0.143672	1.63026	16	0.0881282		15	22	1.09139	2.38308	16	0.457974
														26	11	0.359101	2.17309	11	0.165249		15	23	-0.666954	1.52135	21	0.438395
														26	12	0.17687	1.87146	16	0.0945089		15	24	1.07347	1.64555	12	0.652347
														26	13	0.309177	1.30136	14	0.23758		15	25	-0.365792	1.41878	20	0.257821
														26	14	-0.634777	1.51982	12	0.417666		15	26	0.346743	1.25247	18	0.276847
														26	15	-0.784978	1.56783	19	0.500678		15	27	-0.378255	2.34508	14	0.161297
														26	16	-1.21501	1.7834	12	0.681289		15	28	2.63084	1.49301	8	1.7621
														26	17	-0.310957	1.38076	14	0.225208		15	29	1.63458	2.50671	17	0.652079
														26	18	-0.488998	1.89826	12	0.257603		15	30	0.962248	2.1039	17	0.457363
														26	19	0.468979	1.46175	14	0.320835		15	31	1.38485	1.75775	18	0.787855
														26	20	0.207537	1.35701	23	0.152937		15	32	0.00166855	1.77304	20	0.000941065
														26	21	-1.37579	1.80903	21	0.760512		15	33	0.220834	2.51892	17	0.0876702
														26	22	-1.27065	1.24222	14	1.02288		15	34	1.09084	2.00166	22	0.54497
														26	23	-0.229798	1.56355	9	0.146972		15	35	-0.0494028	2.43377	10	0.0202989
														26	24	-0.615107	1.98735	25	0.309511		15	36	-0.229171	2.5992	12	0.0881698
														26	25	0.270937	2.4351	15	0.111264		15	37	1.2273	2.20172	17	0.55743
														26	26	0.114019	1.89519	58	0.0601621		15	38	1.34655	2.13974	12	0.629306
														26	27	0.828497	1.76106	13	0.470454		15	39	0.785222	2.22283	15	0.353253
														26	28	-0.987242	1.35604	13	0.728034		15	40	0.115326	2.89368	30	0.0398545
														26	29	-0.66996	2.11253	16	0.317137		15	41	0.201133	2.68045	17	0.0750372
														26	30	-0.181862	1.94335	13	0.0935814		15	42	-0.274566	2.6948	19	0.101887
														26	31	-0.0712301	2.50864	17	0.0283939		15	43	-1.09647	2.03271	15	0.539416
														26	32	-0.938547	2.61798	12	0.358501		15	44	-1.24617	2.133	21	0.584234
														26	33	0.675347	1.59405	18	0.423666		15	45	1.14157	2.33498	16	0.488897
														26	34	0.56891	1.22728	14	0.463552		15	46	1.00978	2.19555	14	0.459922
														26	35	-1.9012	1.68223	18	1.13017		15	47	0.409624	2.99338	13	0.136843
														26	36	-1.3228	1.91678	21	0.690116		15	48	1.00276	2.01867	12	0.496742
														26	37	-1.7972	2.12605	18	0.845325		15	49	-0.657597	2.8321	20	0.232195
														26	38	-0.489407	2.00536	16	0.244049		15	50	0.501829	2.14153	16	0.234332
														26	39	-0.194093	2.24101	17	0.0866096		15	51	-0.520374	2.04888	13	0.253979
														26	40	-1.22886	2.78193	19	0.441728		15	52	-0.935313	2.11078	10	0.443113
														26	41	-1.87727	1.94888	12	0.963257		15	53	-2.30264	2.84527	13	0.809288
														27	0	-1.51955	1.25192	8	1.21378		15	54	-0.672834	3.11825	19	0.215773
														27	1	-1.6773	1.13816	17	1.4737		15	55	-2.75812	3.48696	12	0.790981
														27	2	-1.62449	0.742732	14	2.18719		15	56	-1.51389	2.15383	12	0.702884
														27	3	-2.03724	1.58398	11	1.28615		15	57	-0.830019	1.93923	21	0.428016
														27	4	-1.58065	1.7486	13	0.90395		15	58	0.103565	2.32686	11	0.0445086
														27	5	-1.52326	1.35042	17	1.12799		15	59	-0.49305	2.09302	17	0.235569
														27	6	-0.746985	1.55089	12	0.48165		15	60	-1.82924	1.97753	14	0.925014
														27	7	-1.75553	1.00401	14	1.74853		15	61	-2.84749	3.60573	16	0.789711
														27	8	-2.00978	1.3537	15	1.48466		15	62	-2.15926	2.88302	17	0.748957
														27	9	-1.47843	1.72071	15	0.859196		15	63	-1.45103	3.26025	13	0.445067
														27	10	-0.998889	1.26182	15	0.791626		15	64	0.0459592	2.21187	17	0.0207784
														27	11	-1.22378	1.12616	14	1.08668		15	65	-0.930453	2.4546	15	0.379065
														27	12	-1.20195	0.961788	15	1.24971		15	66	-0.377861	2.95614	16	0.127823
														27	13	-1.22081	1.25324	19	0.974118		15	67	-1.50843	2.50065	22	0.603215
														27	14	-2.61519	1.72301	13	1.5178		15	68	-1.28152	2.67563	20	0.478959
														27	15	-1.69507	1.19112	13	1.42309		15	69	-1.90343	3.06164	12	0.621703
														27	16	-1.89618	1.3264	8	1.42957		15	70	-3.1433	3.73625	19	0.841298
														27	17	-2.10043	1.15878	10	1.81261		15	71	-4.30503	4.05182	12	1.06249
														27	18	-1.85547	1.37214	15	1.35224		16	0	1.13733	2.15752	13	0.527148
														27	19	-1.87261	0.920913	14	2.03343		16	1	0.759311	1.54878	13	0.490264
														27	20	-1.45344	1.31666	18	1.10389		16	2	0.916703	1.48458	15	0.617484
														27	21	-2.39114	1.38806	22	1.72265		16	3	0.970241	1.82455	21	0.531769
														27	22	-1.83469	1.64484	17	1.11542		16	4	0.355846	2.00391	16	0.177576
														27	23	-2.55077	1.1906	10	2.14243		16	5	1.16809	1.67285	16	0.698266
														27	24	-2.25531	1.40433	18	1.60597		16	6	1.44371	2.23999	12	0.644517
														27	25	-1.90267	1.80532	16	1.05392		16	7	0.181974	2.12082	12	0.0858036
														27	26	-2.35656	1.27982	13	1.84133		16	8	0.0343812	1.33717	10	0.025712
														27	27	-1.62111	1.26898	52	1.2775		16	9	1.59888	1.54873	17	1.03238
														27	28	-2.43379	1.70336	11	1.42882		16	10	1.39493	1.08341	13	1.28754
														27	29	-3.84055	2.24376	12	1.71166		16	11	0.921642	1.33348	16	0.691157
														27	30	-2.66789	1.42399	13	1.87354		16	12	2.2905	0.79837	11	2.86896
														27	31	-2.54979	1.5739	18	1.62005		16	13	1.44242	1.15912	11	1.24441
														27	32	-2.02029	1.82355	11	1.10789		16	14	1.51404	1.11161	11	1.36202
														27	33	-1.82743	1.80291	11	1.0136		16	15	1.41425	1.06074	12	1.33327
														27	34	-1.2143	1.0986	11	1.10532		16	16	1.11648	1.45911	87	0.765177
														27	35	-4.4966	1.96692	17	2.28611		16	17	1.37528	1.48561	20	0.925737
														27	36	-4.11216	1.68148	10	2.44555		16	18	1.83965	1.3384	14	1.37451
														27	37	-2.831	2.01916	9	1.40207		16	19	1.51702	1.42142	11	1.06725
														27	38	-3.35314	1.8606	18	1.80218		16	20	1.34316	0.964228	12	1.39298
														27	39	-2.06871	1.94316	18	1.06461		16	21	1.37136	1.72445	10	0.795245
														27	40	-3.51307	1.43815	16	2.44277		16	22	1.18568	1.38815	14	0.854139
														27	41	-2.05213	1.52839	11	1.34267		16	23	1.06012	1.09171	9	0.971064
														28	0	1.26611	1.60139	11	0.790635		16	24	1.12744	1.30158	14	0.866204
														28	1	0.406316	1.144	17	0.355172		16	25	-0.100423	2.05319	13	0.0489108
														28	2	1.02445	1.78358	16	0.574377		16	26	0.0804017	1.76044	13	0.0456712
														28	3	1.58563	1.26046	13	1.25798		16	27	2.08849	1.5627	17	1.33646
														28	4	0.77654	1.44735	9	0.536525		16	28	1.74994	1.17869	10	1.48465
														28	5	1.82614	1.68196	15	1.08572		16	29	1.82614	1.27532	18	1.43191
														28	6	1.54319	1.36697	11	1.12891		16	30	1.8126	1.50074	14	1.2078
														28	7	0.0202388	1.14866	11	0.0176195		16	31	1.62424	1.24064	14	1.30919
														28	8	2.62221	1.35298	15	1.9381		16	32	1.33361	1.59917	11	0.833942
														28	9	1.67835	1.55468	16	1.07955		16	33	1.41233	1.2914	12	1.09364
														28	10	2.35218	1.42713	11	1.64818		16	34	1.19177	1.64284	14	0.725431
														28	11	1.26114	1.52091	16	0.8292		16	35	1.48182	1.77816	17	0.833348
														28	12	1.36661	1.57031	16	0.870282		16	36	1.97973	1.27501	17	1.55272
														28	13	1.73597	1.4682	13	1.18238		16	37	2.63361	1.63959	11	1.60626
														28	14	0.614878	1.85457	17	0.331548		16	38	1.39425	1.18348	12	1.1781
														28	15	1.15697	1.88933	16	0.61237		16	39	1.24891	1.83854	11	0.679292
														28	16	0.534275	2.12763	7	0.251112		16	40	1.31385	1.3265	14	0.990467
														28	17	0.688939	1.69698	15	0.40598		16	41	1.16533	2.01504	13	0.578314
														28	18	-0.35334	1.25474	14	0.281604		16	42	0.273979	1.89971	15	0.144221
														28	19	0.0944733	1.20745	11	0.0782419		16	43	0.973929	1.83295	18	0.531344
														28	20	-0.106817	1.78414	13	0.0598701		16	44	0.0277058	2.60028	13	0.0106549
														28	21	3.04488	1.884	20	1.61618		16	45	2.32474	1.51246	16	1.53706
														28	22	0.869901	2.10474	16	0.413306		16	46	2.13431	1.16573	15	1.83087
														28	23	-0.166175	3.09575	6	0.0536784		16	47	1.59336	1.78236	19	0.893962
														28	24	-0.155216	1.51062	19	0.10275		16	48	2.41021	1.31163	14	1.83756
														28	25	-0.527015	2.14897	14	0.245241		16	49	1.83041	3.48804	5	0.524766
														28	26	-0.16052	1.66056	13	0.0966662		16	50	0.846597	1.62889	11	0.519739
														28	27	-0.00227627	2.2496	11	0.00101186		16	51	0.560625	2.41383	12	0.232256
														28	28	0.731705	2.99625	51	0.244207		16	52	1.31111	2.28234	8	0.574459
														28	29	-1.48927	3.06414	13	0.486032		16	53	-0.289608	1.82935	14	0.158312
														28	30	-0.873933	1.94306	15	0.449771		16	54	2.55996	1.80689	15	1.41678
														28	31	-0.425773	2.83995	15	0.149922		16	55	2.06866	2.22349	15	0.930367
														28	32	-1.65789	1.19523	11	1.38709		16	56	0.858786	1.78203	12	0.481916
														28	33	-0.235161	1.75903	12	0.133688		16	57	1.40886	2.46515	11	0.57151
														28	34	-0.654479	2.24065	16	0.292094		16	58	0.153111	1.68756	10	0.0907294
														28	35	-1.16749	3.81325	15	0.306167		16	59	0.852605	1.76603	12	0.482781
														28	36	0.400529	3.03989	21	0.131758		16	60	-0.201875	2.253	9	0.0896027
														28	37	-2.95979	2.8165	13	1.05088		16	61	-0.0628958	1.98773	16	0.031642
														28	38	-1.38795	2.89911	15	0.47875		16	62	-1.48038	3.00566	13	0.492532
														28	39	-1.7853	1.48798	14	1.19982		16	63	1.96533	1.84219	16	1.06685
														28	40	-0.412816	1.88178	10	0.219375		16	64	1.34431	1.63506	10	0.822179
														28	41	-0.125544	2.8522	9	0.0440166		16	65	1.58285	1.64209	21	0.963927
														29	0	0.638412	1.50619	12	0.42386		16	66	0.506989	2.53335	21	0.200126
														29	1	0.876258	2.31687	21	0.378208		16	67	0.897524	1.66574	10	0.538814
														29	2	0.569991	1.79677	17	0.317231		16	68	1.08773	1.99418	15	0.545453
														29	3	-0.506052	1.41329	13	0.358066		16	69	-0.301197	2.0342	15	0.148067
														29	4	-0.940818	1.61805	10	0.581452		16	70	-0.560594	2.53983	12	0.220721
														29	5	-0.719437	2.61027	18	0.275618		16	71	-1.71827	2.67527	10	0.642278
														29	6	0.506784	3.03259	15	0.167112		17	0	0.564123	1.12293	14	0.502368
														29	7	0.940939	1.87106	24	0.502891		17	1	0.748477	0.783601	14	0.955176
														29	8	0.637809	1.52811	18	0.417383		17	2	0.204942	1.16461	17	0.175975
														29	9	1.94166	2.78309	18	0.697665		17	3	0.340368	1.23886	21	0.274744
														29	10	1.07952	2.58954	10	0.416876		17	4	-0.0956965	1.08047	16	0.0885694
														29	11	1.01465	2.08389	14	0.486903		17	5	-0.672308	0.872098	12	0.770908
														29	12	0.906768	2.11782	17	0.42816		17	6	-0.636146	1.84872	18	0.344101
														29	13	0.13732	1.96759	17	0.0697912		17	7	-1.0134	1.18682	11	0.853883
														29	14	0.981156	2.04895	13	0.478858		17	8	-2.15714	1.39915	18	1.54175
														29	15	1.42873	1.9164	14	0.745529		17	9	0.259043	1.28313	13	0.201884
														29	16	1.04535	2.0774	21	0.5032		17	10	0.563656	0.804622	11	0.700522
														29	17	1.19406	2.41027	24	0.495405		17	11	0.648463	0.976533	18	0.664046
														29	18	-0.101649	2.09127	16	0.0486061		17	12	0.98527	1.23904	7	0.795186
														29	19	0.123266	1.84381	19	0.0668536		17	13	-0.133627	1.03902	14	0.128608
														29	20	-0.360343	2.42579	22	0.148547		17	14	-0.676651	1.38387	16	0.488956
														29	21	2.2014	2.38453	15	0.923203		17	15	-0.842621	1.28772	19	0.65435
														29	22	2.13782	2.25094	21	0.949745		17	16	-0.808888	1.32013	20	0.612735
														29	23	2.15143	3.42376	19	0.628381		17	17	0.13578	1.30908	99	0.103722
														29	24	0.651027	2.44115	20	0.266688		17	18	0.777106	1.01884	20	0.762739
														29	25	0.402341	2.90358	17	0.138567		17	19	0.484317	0.753511	10	0.642748
														29	26	-0.805091	2.33644	16	0.34458		17	20	0.503391	0.912581	12	0.551612
														29	27	-1.38639	2.01491	12	0.688066		17	21	0.755172	1.0753	14	0.702291
														29	28	3.22367	3.17567	13	1.01511		17	22	0.54522	1.20563	13	0.452228
														29	29	1.18494	2.75906	62	0.429473		17	23	-0.333517	0.889144	16	0.375099
														29	30	-0.482532	2.24638	10	0.214804		17	24	-0.128531	1.08749	19	0.118191
														29	31	-0.62937	2.19825	24	0.286305		17	25	-0.882575	0.852578	8	1.03518
														29	32	-1.45901	1.78721	11	0.816359		17	26	-2.09907	0.7851	12	2.67364
														29	33	-2.16928	2.20828	20	0.982336		17	27	0.568368	1.10345	13	0.515083
														29	34	-1.01472	2.59445	19	0.391112		17	28	0.608388	1.00303	12	0.60655
														29	35	1.7268	3.19698	16	0.540136		17	29	1.13874	1.21276	15	0.938972
														29	36	2.13646	2.60814	19	0.819151		17	30	0.11579	1.2675	21	0.0913528
														29	37	0.0855267	2.32004	24	0.0368643		17	31	0.693807	1.08577	20	0.638998
														29	38	-1.14686	2.4673	15	0.464824		17	32	0.0540711	1.23185	20	0.0438942
														29	39	0.322836	2.35704	9	0.136967		17	33	0.117122	1.02832	17	0.113897
														29	40	-2.27705	2.5118	14	0.906542		17	34	-0.209162	1.53002	18	0.136705
														29	41	-3.09071	2.48057	15	1.24597		17	35	-0.519193	1.42542	17	0.36424
														30	0	1.68942	1.05455	11	1.60202		17	36	0.0103908	1.15177	13	0.00902153
														30	1	1.53993	0.983003	10	1.56656		17	37	-0.49056	1.4171	14	0.34617
														30	2	1.78006	1.08587	15	1.63929		17	38	0.657146	1.34955	16	0.486937
														30	3	1.49556	1.37288	15	1.08936		17	39	0.143032	1.41679	21	0.100955
														30	4	1.25578	1.31739	10	0.953233		17	40	0.359816	1.14105	10	0.315339
														30	5	1.30947	1.23326	11	1.0618		17	41	-0.605249	1.51863	19	0.398549
														30	6	1.37483	1.19769	13	1.1479		17	42	-0.656014	1.30801	12	0.501537
														30	7	1.96914	1.18751	9	1.65822		17	43	-1.24497	1.3315	20	0.935014
														30	8	1.86822	1.06735	16	1.75034		17	44	-0.923148	1.55289	20	0.594472
														30	9	2.38567	0.939554	13	2.53915		17	45	0.223343	1.40176	15	0.159331
														30	10	1.99137	0.862092	14	2.30993		17	46	0.459399	1.57708	22	0.291297
														30	11	1.55416	1.29669	8	1.19856		17	47	0.312155	1.8501	15	0.168724
														30	12	1.72101	0.840728	13	2.04704		17	48	-0.603188	1.88343	18	0.320259
														30	13	1.24984	1.16863	10	1.06949		17	49	-0.0880218	1.89206	12	0.0465216
														30	14	1.50758	0.823605	14	1.83046		17	50	-0.454588	1.61089	17	0.282197
														30	15	1.62713	1.00723	8	1.61545		17	51	-0.593974	1.21618	14	0.488395
														30	16	1.89263	1.3936	10	1.35808		17	52	-1.87881	1.88437	15	0.997049
														30	17	0.991268	0.398469	11	2.48769		17	53	-1.48156	2.05164	13	0.722136
														30	18	1.49428	1.13416	15	1.31752		17	54	-0.0438735	1.61458	18	0.0271734
														30	19	1.41509	1.55361	10	0.910843		17	55	0.013613	1.74417	9	0.00780485
														30	20	1.30843	1.71993	9	0.760744		17	56	0.322229	0.782755	17	0.41166
														30	21	1.66889	1.14866	18	1.4529		17	57	-0.467096	1.87077	20	0.249681
														30	22	1.98646	1.47663	19	1.34527		17	58	-0.304015	1.46497	15	0.207523
														30	23	1.52583	1.16835	10	1.30597		17	59	-1.31182	1.99998	11	0.655913
														30	24	1.46325	0.847925	20	1.72569		17	60	-1.22089	1.9978	16	0.611116
														30	25	1.09093	1.20875	11	0.902527		17	61	-2.38433	1.70531	18	1.39818
														30	26	1.20896	0.916876	13	1.31857		17	62	-2.3285	1.27856	10	1.82119
														30	27	1.35951	1.25948	13	1.07942		17	63	1.08512	2.04862	9	0.529682
														30	28	1.48443	0.352782	15	4.20777		17	64	0.562988	1.43634	7	0.391959
														30	29	1.41046	1.20655	10	1.16901		17	65	-1.22593	2.12141	17	0.577886
														30	30	1.45656	1.26897	47	1.14782		17	66	-0.700896	1.62411	17	0.431558
														30	31	1.82765	1.92653	13	0.948673		17	67	-1.3582	2.03761	17	0.666566
														30	32	-0.0851099	1.63339	9	0.0521063		17	68	-1.18726	1.40783	20	0.843326
														30	33	0.771397	1.77102	19	0.435567		17	69	-1.17562	1.42651	17	0.824126
														30	34	1.81314	1.25164	12	1.44861		17	70	-1.87254	2.36297	16	0.792453
														30	35	1.85796	1.75151	16	1.06077		17	71	-1.85822	2.06096	13	0.901625
														30	36	1.16421	1.16138	15	1.00244		18	0	-1.57984	1.17568	14	1.34376
														30	37	0.663395	1.43416	12	0.462565		18	1	-1.33928	1.16709	17	1.14753
														30	38	0.876822	1.27778	14	0.686208		18	2	-1.05387	1.50419	20	0.700626
														30	39	1.66669	1.61851	14	1.02977		18	3	-0.636354	1.22846	18	0.518011
														30	40	1.01424	0.766213	7	1.32371		18	4	-0.985668	1.25905	14	0.782868
														30	41	0.29421	1.56565	12	0.187915		18	5	-1.45806	1.79388	21	0.812798
														31	0	0.971431	0.804825	15	1.20701		18	6	-1.14556	1.41737	9	0.808229
														31	1	-0.306144	1.47098	23	0.208122		18	7	-1.29496	1.44657	11	0.895194
														31	2	-0.533045	1.66039	20	0.321035		18	8	-1.48683	1.49036	16	0.997631
														31	3	0.109324	1.4435	18	0.0757354		18	9	-1.2198	1.23637	11	0.986593
														31	4	0.366494	1.5374	18	0.238386		18	10	0.185624	0.797917	10	0.232636
														31	5	0.116201	1.2919	13	0.0899459		18	11	-0.15652	1.27601	18	0.122664
														31	6	-0.275602	1.68406	20	0.163653		18	12	0.761969	1.20816	13	0.630686
														31	7	-0.754783	1.32418	21	0.569999		18	13	-0.125801	1.28268	12	0.0980762
														31	8	-0.740594	1.54598	14	0.479045		18	14	-0.738533	0.958421	13	0.770572
														31	9	-0.990441	1.20251	21	0.823648		18	15	-0.122986	1.2568	17	0.0978568
														31	10	-1.3182	1.73082	12	0.761601		18	16	-0.738635	1.29347	14	0.571051
														31	11	-0.801533	0.999978	14	0.801551		18	17	-0.716404	1.0495	20	0.682613
														31	12	-0.807928	1.2461	24	0.648364		18	18	0.985551	1.21531	96	0.810945
														31	13	-0.598049	1.65667	15	0.360994		18	19	1.31766	0.692945	12	1.90154
														31	14	-0.980674	0.877687	17	1.11734		18	20	0.429812	0.624831	8	0.687885
														31	15	-0.338095	1.29095	19	0.261895		18	21	0.552329	0.825253	14	0.669285
														31	16	-1.60646	1.64165	13	0.978562		18	22	0.622163	1.13081	20	0.550194
														31	17	-0.554355	1.26454	14	0.438384		18	23	-0.606143	1.04386	17	0.580672
														31	18	-0.935291	1.30975	17	0.714102		18	24	-0.266047	1.34356	17	0.198016
														31	19	-1.36561	1.54832	19	0.881996		18	25	0.618668	1.21952	19	0.507303
														31	20	-0.330651	0.812077	21	0.407167		18	26	0.0767824	1.63316	11	0.0470147
														31	21	-0.917632	1.99731	17	0.459435		18	27	0.16749	1.59643	12	0.104916
														31	22	-1.57667	2.18261	19	0.722378		18	28	1.35459	1.2576	14	1.07712
														31	23	-0.918861	1.62536	17	0.565326		18	29	1.07921	1.00398	13	1.07493
														31	24	-1.46835	1.21692	21	1.20662		18	30	0.515817	0.915434	15	0.563467
														31	25	-0.972569	1.82503	23	0.532906		18	31	0.331419	1.1992	8	0.276368
														31	26	-0.844188	1.28257	17	0.658201		18	32	0.669247	0.969027	20	0.690639
														31	27	-1.0916	1.74449	18	0.625741		18	33	-0.195167	1.25382	11	0.155658
														31	28	-0.821419	1.256	15	0.653995		18	34	0.453478	1.20487	19	0.376371
														31	29	-0.642568	1.38638	24	0.463486		18	35	-0.10011	1.06547	9	0.0939591
														31	30	-2.43065	1.97951	13	1.2279		18	36	1.03122	1.63154	13	0.632053
														31	31	-0.32226	1.741	67	0.185101		18	37	0.93543	1.14898	15	0.814138
														31	32	-1.08146	1.66643	20	0.648969		18	38	0.864117	1.47636	13	0.585302
														31	33	-0.921201	2.03755	16	0.452111		18	39	0.15042	1.32128	16	0.113845
														31	34	-0.498106	2.13514	22	0.233289		18	40	0.765559	1.32333	17	0.57851
														31	35	-1.02308	1.80863	17	0.565667		18	41	0.417991	1.13162	20	0.369376
														31	36	-0.444251	1.60024	23	0.277616		18	42	0.388875	1.47697	19	0.263292
														31	37	-1.30778	1.24288	18	1.05222		18	43	0.109096	1.65852	18	0.0657794
														31	38	-0.642939	1.36771	18	0.470083		18	44	-0.596325	1.33191	11	0.44772
														31	39	-2.41238	1.42012	20	1.69871		18	45	1.13199	1.28289	24	0.882373
														31	40	-0.223563	1.28767	21	0.173618		18	46	1.84011	2.43669	15	0.755166
														31	41	0.266215	1.7423	10	0.152795		18	47	0.530229	1.14147	14	0.464513
														32	0	1.31237	1.24491	9	1.05418		18	48	-0.0745494	1.47164	14	0.0506572
														32	1	1.04639	0.884695	24	1.18276		18	49	0.33225	1.19841	16	0.277242
														32	2	1.29461	0.636395	16	2.03429		18	50	1.11353	1.50381	16	0.740469
														32	3	1.7346	1.10209	15	1.57391		18	51	0.819679	1.75259	23	0.467697
														32	4	2.78268	1.31621	12	2.11416		18	52	0.0178818	1.8389	12	0.00972418
														32	5	1.7798	0.559958	11	3.17845		18	53	-0.326687	2.06933	13	0.157871
														32	6	1.87804	1.16102	15	1.61759		18	54	2.36304	1.20552	9	1.96018
														32	7	0.866761	0.782974	14	1.10701		18	55	2.33021	1.92732	15	1.20904
														32	8	0.513335	0.83357	10	0.615827		18	56	0.449409	1.97816	21	0.227185
														32	9	0.341722	1.1133	10	0.306945		18	57	0.735898	1.38529	17	0.531223
														32	10	0.576519	0.686009	11	0.840396		18	58	1.3451	0.944553	12	1.42406
														32	11	1.16179	0.983055	14	1.18182		18	59	0.270476	1.47886	18	0.182896
														32	12	1.18586	1.06166	17	1.11699		18	60	0.558995	1.34542	12	0.41548
														32	13	0.932809	0.875336	9	1.06566		18	61	-0.34429	2.63413	8	0.130703
														32	14	-0.512875	1.047	17	0.489852		18	62	0.595001	1.81809	15	0.327266
														32	15	-0.151969	1.12525	18	0.135053		18	63	-0.0757981	1.77	10	0.0428237
														32	16	-0.330024	1.09746	21	0.300716		18	64	1.43288	1.53037	12	0.936298
														32	17	0.0940618	1.11975	13	0.0840026		18	65	0.943001	2.08251	18	0.452819
														32	18	0.803733	1.32387	15	0.607111		18	66	0.970536	1.65117	18	0.587787
														32	19	0.934892	0.644703	10	1.45011		18	67	0.895103	1.20635	15	0.74199
														32	20	0.911591	0.778568	19	1.17086		18	68	1.45079	1.69726	9	0.854783
														32	21	-0.11396	1.3372	15	0.0852233		18	69	0.114965	1.5017	22	0.076557
														32	22	-0.357752	1.29959	13	0.27528		18	70	-0.112718	1.6272	13	0.0692711
														32	23	-0.0414032	1.4992	12	0.0276168		18	71	0.378745	2.81966	16	0.134323
														32	24	0.145917	1.65633	14	0.0880966		19	0	-2.97717	2.33732	20	1.27376
														32	25	1.01756	1.32967	21	0.765272		19	1	-2.65235	1.68174	9	1.57715
														32	26	1.21926	1.32693	12	0.918861		19	2	-2.93738	1.5928	13	1.84416
														32	27	1.62805	1.09701	11	1.48409		19	3	-2.74817	1.38976	19	1.97745
														32	28	-0.619549	1.52821	11	0.405408		19	4	-2.42404	2.12118	17	1.14278
														32	29	-0.385141	1.93959	11	0.198568		19	5	-3.00951	1.67809	13	1.79342
														32	30	-0.553386	0.928742	9	0.595845		19	6	-2.99612	2.13921	16	1.40057
														32	31	1.00225	1.37558	20	0.728602		19	7	-2.29632	3.35087	14	0.685291
														32	32	1.18435	1.3151	53	0.900578		19	8	-0.217484	2.85526	14	0.0761696
														32	33	1.75799	1.66535	14	1.05563		19	9	-1.76364	2.02896	19	0.869236
														32	34	1.6365	1.69095	14	0.967804		19	10	-2.26233	1.42991	16	1.58214
														32	35	-0.812794	1.29673	12	0.626804		19	11	-1.90678	1.91312	21	0.996688
														32	36	0.166302	1.5394	19	0.10803		19	12	-0.74911	1.01972	9	0.734622
														32	37	0.0784967	1.96028	14	0.0400437		19	13	-1.86023	2.39816	19	0.775689
														32	38	-0.655536	0.953827	16	0.687269		19	14	-2.04678	1.60819	5	1.27272
														32	39	0.781814	2.05885	18	0.379733		19	15	-0.612144	1.59705	11	0.383298
														32	40	0.168782	0.99743	12	0.169217		19	16	-2.20338	2.16385	11	1.01827
														32	41	1.12502	1.47032	15	0.765155		19	17	-0.282022	2.16114	10	0.130497
														33	0	-1.24973	1.92173	9	0.650314		19	18	-1.1728	2.17216	12	0.539925
														33	1	-0.737045	1.52329	14	0.483851		19	19	0.00477761	1.77213	102	0.00269596
														33	2	-0.228703	1.32518	22	0.172583		19	20	-2.16697	1.76092	11	1.23059
														33	3	0.315797	1.40681	11	0.224477		19	21	-0.530688	1.65823	17	0.320032
														33	4	0.483977	0.938879	13	0.515484		19	22	-0.606789	1.55209	15	0.390949
														33	5	-0.250152	1.23339	17	0.202817		19	23	-0.0941839	1.34656	12	0.0699441
														33	6	-0.778638	1.47107	12	0.529301		19	24	-1.21315	2.46634	19	0.491883
														33	7	-0.706648	1.15232	14	0.613239		19	25	-0.646368	2.13824	18	0.30229
														33	8	-0.346051	1.50376	14	0.230124		19	26	-1.59551	2.143	7	0.744522
														33	9	-1.05802	1.43379	21	0.737922		19	27	-1.59037	1.98508	18	0.801163
														33	10	-0.945719	1.25181	17	0.75548		19	28	-1.47154	3.09028	11	0.476182
														33	11	-0.891514	1.02415	11	0.870492		19	29	-1.08014	1.75276	18	0.616248
														33	12	-1.19052	1.46089	20	0.814926		19	30	-0.588237	2.28276	21	0.257686
														33	13	-1.46177	1.60514	12	0.910684		19	31	-0.15233	1.97424	20	0.0771591
														33	14	-0.836352	1.55479	12	0.537919		19	32	-0.584082	1.96533	18	0.297193
														33	15	-1.97502	1.52151	14	1.29807		19	33	-0.50606	2.12184	16	0.238501
														33	16	-1.29646	2.27419	12	0.570076		19	34	-0.147777	2.53191	16	0.0583657
														33	17	-1.13973	1.34609	15	0.846697		19	35	-0.552951	2.01697	18	0.274149
														33	18	-2.25642	1.37925	12	1.63598		19	36	-0.937189	2.5189	13	0.372063
														33	19	-1.17074	1.7491	18	0.669338		19	37	-1.41499	1.88444	16	0.750878
														33	20	-1.29623	1.58059	15	0.82009		19	38	-1.04132	1.95993	25	0.531305
														33	21	-1.92683	1.77318	22	1.08665		19	39	-1.08212	1.6534	13	0.654478
														33	22	-1.92535	2.04546	13	0.94128		19	40	-1.88157	2.27586	15	0.826748
														33	23	-1.75878	2.54542	12	0.690957		19	41	-1.28552	2.6185	28	0.49094
														33	24	-1.22577	2.11291	17	0.580135		19	42	-2.05403	2.38899	14	0.859789
														33	25	-1.01462	2.15927	16	0.469892		19	43	-1.96677	2.45171	19	0.802203
														33	26	-1.39978	2.20194	18	0.635702		19	44	-0.854408	2.71375	28	0.314844
														33	27	-1.04055	1.87544	11	0.554832		19	45	-0.598389	2.22414	18	0.269042
														33	28	-1.00197	2.0265	12	0.494432		19	46	-3.35143	3.37412	15	0.993275
														33	29	-0.317899	2.63644	20	0.120579		19	47	-2.7402	3.20976	14	0.853707
														33	30	-0.135512	1.56754	19	0.0864488		19	48	-0.597013	2.00729	15	0.297422
														33	31	-0.280652	2.22649	16	0.126051		19	49	-1.15503	1.79827	10	0.6423
														33	32	-1.24404	2.8014	14	0.444078		19	50	-2.70533	3.18082	20	0.850513
														33	33	-1.12331	2.55351	56	0.439911		19	51	-3.40082	3.08173	19	1.10354
														33	34	-0.530319	1.8516	16	0.286411		19	52	-0.104481	1.97781	12	0.0528268
														33	35	-1.11065	2.31668	14	0.479411		19	53	-2.77463	3.55875	21	0.779665
														33	36	0.00313162	3.18286	13	0.0009839		19	54	-0.513965	2.16599	14	0.237289
														33	37	0.0622044	2.18589	17	0.0284573		19	55	-0.995436	3.70954	17	0.268345
														33	38	-1.24946	2.48053	14	0.503706		19	56	-2.06589	2.35064	15	0.878864
														33	39	-2.04201	3.63449	16	0.561843		19	57	-1.32294	2.9745	18	0.444759
														33	40	-4.93636	2.34551	17	2.1046		19	58	-1.97185	3.01334	21	0.654372
														33	41	-1.58701	2.70343	14	0.587034		19	59	-1.80696	2.68093	12	0.674006
														34	0	0.087583	0.679536	8	0.128886		19	60	-2.15021	2.81288	12	0.764417
														34	1	0.177306	1.35257	17	0.131088		19	61	-3.34985	4.07331	22	0.82239
														34	2	-0.115581	1.15453	15	0.100111		19	62	-2.5575	3.61543	15	0.707385
														34	3	0.698002	1.33602	16	0.522448		19	63	-1.90005	2.08445	12	0.911533
														34	4	0.467497	1.12698	13	0.414824		19	64	-2.39296	3.70187	19	0.646419
														34	5	0.894656	1.70535	15	0.524618		19	65	-2.28637	3.63497	18	0.628992
														34	6	1.8754	1.22044	11	1.53666		19	66	-1.09947	1.64998	13	0.666355
														34	7	-0.0148975	0.959596	19	0.0155247		19	67	-2.02938	3.69401	19	0.549371
														34	8	0.275487	1.77304	13	0.155375		19	68	-2.16787	4.41416	14	0.491117
														34	9	1.35848	1.60992	16	0.843818		19	69	-2.69713	3.28609	10	0.820772
														34	10	0.962704	1.20678	16	0.797743		19	70	-2.06267	4.59784	14	0.448617
														34	11	0.988119	1.26068	14	0.783796		19	71	-1.65161	4.29302	19	0.384721
														34	12	0.631139	1.36929	15	0.460925		20	0	-1.11071	3.81446	14	0.291185
														34	13	1.09483	1.66614	15	0.657106		20	1	-0.956994	2.60467	16	0.367415
														34	14	0.28498	1.34639	17	0.211661		20	2	0.676094	1.94323	16	0.347924
														34	15	-0.328101	1.88215	18	0.174323		20	3	0.491511	2.59853	15	0.18915
														34	16	-0.448355	1.46188	18	0.306699		20	4	-0.144903	1.92235	11	0.075378
														34	17	-0.461127	1.70508	13	0.270442		20	5	-1.29579	2.68811	15	0.482045
														34	18	-0.0418801	1.71475	15	0.0244234		20	6	-0.0352522	2.8676	17	0.0122933
														34	19	-0.153685	1.22619	12	0.125335		20	7	1.34356	2.35165	10	0.571325
														34	20	-0.161642	1.85992	12	0.0869081		20	8	2.76547	3.35356	13	0.824638
														34	21	0.557872	1.68656	17	0.330776		20	9	0.447284	2.19887	14	0.203415
														34	22	-0.556509	1.33813	26	0.415887		20	10	0.0207567	1.945	10	0.0106718
														34	23	-0.337327	1.66445	11	0.202666		20	11	-0.518079	2.9777	9	0.173986
														34	24	-0.641418	1.67621	16	0.382661		20	12	2.03768	1.43542	14	1.41957
														34	25	-1.52164	2.09159	17	0.727504		20	13	0.707447	3.21184	11	0.220262
														34	26	-1.04139	2.13922	14	0.486806		20	14	0.64033	1.65398	14	0.387145
														34	27	0.289803	1.40548	11	0.206196		20	15	0.894791	2.77981	14	0.321889
														34	28	-0.516527	1.83436	16	0.281584		20	16	0.480729	2.43998	12	0.197021
														34	29	-2.25652	2.29681	19	0.98246		20	17	1.04326	2.88569	12	0.361528
														34	30	-0.889934	1.25207	12	0.710771		20	18	-1.03568	2.16715	8	0.477899
														34	31	-2.49801	2.0723	22	1.20543		20	19	1.4709	3.75418	11	0.391802
														34	32	-2.53916	1.96183	14	1.29428		20	20	1.12561	2.4367	84	0.461938
														34	33	-2.10235	2.39648	16	0.877269		20	21	-0.296551	2.45238	13	0.120924
														34	34	-0.806346	1.8745	57	0.430166		20	22	0.0325578	1.74838	10	0.0186217
														34	35	-1.36648	2.53609	17	0.538815		20	23	-0.921852	2.45874	13	0.374929
														34	36	-2.80025	2.7041	17	1.03555		20	24	0.0472314	2.72342	14	0.0173427
														34	37	-1.78628	2.05462	19	0.8694		20	25	3.11549	2.45223	8	1.27047
														34	38	-2.52733	2.26204	15	1.11728		20	26	1.6489	3.21777	11	0.512435
														34	39	-2.28671	1.66113	19	1.3766		20	27	-0.24249	2.7317	15	0.088769
														34	40	-4.26124	1.95334	14	2.18152		20	28	0.573365	1.59866	15	0.358654
														34	41	-3.66965	0.859967	7	4.2672		20	29	-0.342444	2.17181	13	0.157677
														35	0	-0.252577	1.04142	12	0.242532		20	30	2.22881	2.90278	20	0.767821
														35	1	-0.0209368	0.744597	16	0.0281183		20	31	0.018698	3.72435	9	0.00502048
														35	2	-0.121661	0.723025	19	0.168267		20	32	0.979885	2.02518	12	0.483851
														35	3	0.00378271	0.671641	19	0.00563204		20	33	-0.339256	1.58231	9	0.214406
														35	4	-0.0916534	0.598068	7	0.153249		20	34	1.10134	1.85355	16	0.594176
														35	5	-0.0554602	0.869279	18	0.0638003		20	35	1.84	2.75013	11	0.669059
														35	6	-0.0729042	0.978599	18	0.0744985		20	36	0.467877	2.06254	11	0.226845
														35	7	-0.237688	0.795801	20	0.298678		20	37	-0.463222	2.43531	12	0.190211
														35	8	0.141057	1.2244	17	0.115205		20	38	0.0473461	3.87144	15	0.0122296
														35	9	-0.1243	1.19182	19	0.104295		20	39	-0.476848	2.60739	14	0.182883
														35	10	-0.343894	1.07173	13	0.320878		20	40	0.0457347	2.09792	17	0.0218001
														35	11	-0.358193	1.195	17	0.299742		20	41	1.14297	3.18231	15	0.359163
														35	12	-0.130684	0.549808	15	0.23769		20	42	-0.673794	2.22073	12	0.303411
														35	13	0.183349	0.863071	17	0.212438		20	43	1.49737	2.79407	11	0.535909
														35	14	0.342069	1.31538	19	0.260054		20	44	1.08767	2.63598	15	0.412626
														35	15	-0.0605304	1.20996	14	0.0500267		20	45	-1.38634	2.79503	15	0.496003
														35	16	0.214907	0.906754	17	0.237007		20	46	-1.79144	2.94009	11	0.609313
														35	17	0.110233	0.779909	7	0.141341		20	47	-1.33586	3.84707	13	0.347241
														35	18	-0.0277976	0.811818	17	0.0342412		20	48	-1.63989	2.39411	11	0.684969
														35	19	0.22862	0.857718	16	0.266545		20	49	0.551159	1.73774	8	0.317171
														35	20	-0.0948821	0.87438	14	0.108514		20	50	-0.126301	2.90791	15	0.0434338
														35	21	1.10697	1.20182	21	0.921079		20	51	1.4598	3.33786	10	0.437345
														35	22	0.571885	1.17022	22	0.4887		20	52	1.723	1.85831	14	0.927188
														35	23	0.448613	1.10864	18	0.404651		20	53	2.79682	2.15805	13	1.29599
														35	24	0.452751	0.874361	21	0.517807		20	54	-0.93892	2.80727	15	0.33446
														35	25	-0.00823335	0.761026	16	0.0108188		20	55	-0.913376	2.10769	13	0.433355
														35	26	0.138248	0.958462	18	0.14424		20	56	-2.238	2.46449	16	0.908099
														35	27	0.497411	0.83412	17	0.59633		20	57	-0.0564344	2.42841	14	0.0232392
														35	28	0.590771	0.94568	15	0.624705		20	58	0.540609	2.86846	21	0.188466
														35	29	0.556627	1.21112	16	0.459596		20	59	-0.824145	2.86716	16	0.287443
														35	30	0.874138	0.69292	16	1.26153		20	60	1.5666	3.03596	16	0.516015
														35	31	-0.0840258	0.956877	17	0.0878125		20	61	2.85753	3.78618	19	0.754728
														35	32	-0.384486	0.952896	12	0.403492		20	62	-0.0417333	3.77384	16	0.0110586
														35	33	-0.128759	1.19546	14	0.107707		20	63	-3.14245	3.4266	17	0.917075
														35	34	-0.18825	0.948233	17	0.198527		20	64	-1.96574	2.52758	7	0.777717
														35	35	1.42584	1.32957	61	1.07241		20	65	-2.17894	2.53871	14	0.858286
														35	36	1.19693	1.17323	20	1.0202		20	66	-0.350219	4.02582	10	0.086993
														35	37	0.583961	1.09508	15	0.533261		20	67	2.91877	3.74713	9	0.778933
														35	38	0.877435	1.23984	19	0.707697		20	68	2.35442	2.3337	22	1.00888
														35	39	-0.00364128	0.976191	17	0.00373009		20	69	0.730063	2.52787	14	0.288805
														35	40	-0.0381195	1.0739	15	0.0354962		20	70	2.50859	2.53883	10	0.988089
														35	41	0.0100701	1.0096	14	0.0099744		20	71	2.01398	4.45193	9	0.452383
														36	0	-1.44448	0.575061	16	2.51187		21	0	-0.94788	2.13516	13	0.44394
														36	1	-1.58651	0.458713	17	3.45862		21	1	-0.462745	2.30991	19	0.200331
														36	2	-1.33205	0.48632	16	2.73904		21	2	-0.998647	2.37552	15	0.42039
														36	3	-1.28099	0.521897	14	2.45448		21	3	-1.1767	2.62241	17	0.448711
														36	4	-0.877504	0.443645	11	1.97794		21	4	-1.23081	1.41393	16	0.870489
														36	5	-1.28947	0.693968	22	1.85811		21	5	-1.69684	2.4844	16	0.682997
														36	6	-1.14936	0.701583	18	1.63824		21	6	0.433848	2.89136	14	0.15005
														36	7	-1.49233	0.672674	15	2.21851		21	7	1.257	2.78926	15	0.450657
														36	8	-1.45577	0.774087	22	1.88062		21	8	-0.322515	2.5137	16	0.128303
														36	9	-1.89185	1.06021	15	1.78442		21	9	-0.240384	2.4235	6	0.099189
														36	10	-1.13488	0.631686	13	1.79659		21	10	1.31736	2.45865	12	0.535805
														36	11	-1.68441	0.581117	16	2.89858		21	11	-0.481491	1.19992	9	0.40127
														36	12	-1.55558	0.561605	17	2.76989		21	12	1.66997	2.1905	11	0.762367
														36	13	-1.53149	0.745926	17	2.05314		21	13	1.23036	2.65252	13	0.463845
														36	14	-1.94287	0.895596	14	2.16935		21	14	-0.803232	1.36876	17	0.586832
														36	15	-1.80296	0.758532	19	2.37691		21	15	-0.558486	1.64126	16	0.340279
														36	16	-1.69024	0.727585	19	2.32308		21	16	0.850286	2.15481	10	0.394599
														36	17	-1.80087	0.896186	17	2.00948		21	17	0.704037	2.94423	14	0.239124
														36	18	-2.02639	0.914034	15	2.21698		21	18	-1.11624	2.07597	14	0.537696
														36	19	-1.62714	0.749532	11	2.17088		21	19	0.335277	2.71304	17	0.12358
														36	20	-1.82297	0.55081	19	3.30961		21	20	-0.416853	2.268	13	0.183798
														36	21	-2.13234	0.827742	21	2.57609		21	21	0.653817	2.43163	92	0.26888
														36	22	-1.60567	0.946716	18	1.69605		21	22	0.337252	2.47556	13	0.136233
														36	23	-2.32224	1.13348	9	2.04876		21	23	-1.96825	2.64691	13	0.743602
														36	24	-1.91031	0.936054	22	2.04081		21	24	0.251296	1.8705	17	0.134347
														36	25	-1.76754	0.895733	15	1.97329		21	25	-0.0672887	2.6764	16	0.0251415
														36	26	-1.8036	0.924629	21	1.95062		21	26	0.266002	2.18257	9	0.121876
														36	27	-2.1502	0.782442	10	2.74806		21	27	-0.631883	2.84422	13	0.222164
														36	28	-1.60791	0.868007	21	1.85242		21	28	0.0508232	2.3631	14	0.021507
														36	29	-2.16704	1.08101	19	2.00464		21	29	-0.550998	2.73965	19	0.20112
														36	30	-1.38325	1.10149	15	1.2558		21	30	-0.700396	2.42033	13	0.28938
														36	31	-1.95487	0.796358	23	2.45477		21	31	-0.626686	2.67933	14	0.233897
														36	32	-1.58398	1.05176	19	1.50603		21	32	-0.27271	2.20712	14	0.123559
														36	33	-1.5475	1.26582	13	1.22253		21	33	-1.10994	2.22546	14	0.498747
														36	34	-1.98891	0.860381	17	2.31166		21	34	-1.60873	2.72389	14	0.5906
														36	35	-2.21203	1.16685	20	1.89572		21	35	-0.580599	2.85917	13	0.203066
														36	36	-1.64019	1.08329	62	1.51407		21	36	-2.81421	2.81461	9	0.99986
														36	37	-1.52539	0.783544	14	1.94679		21	37	-1.04307	3.25642	13	0.320312
														36	38	-2.53837	0.729529	19	3.47946		21	38	-1.50564	3.6757	17	0.409619
														36	39	-1.72939	1.49952	17	1.15329		21	39	-1.99056	2.59597	17	0.766787
														36	40	-1.70409	1.13352	14	1.50336		21	40	-2.06149	2.43217	17	0.847592
														36	41	-1.77776	0.792627	12	2.24287		21	41	-2.27942	2.35459	14	0.968074
														37	0	-1.37125	1.22843	17	1.11627		21	42	-1.65374	3.63883	10	0.45447
														37	1	-1.00564	0.610254	12	1.64791		21	43	-1.95033	2.17656	13	0.896064
														37	2	-1.1739	0.68526	18	1.71307		21	44	-0.643797	2.7932	19	0.230487
														37	3	-1.39342	0.731488	15	1.90491		21	45	-1.06335	2.70341	15	0.393337
														37	4	-1.47325	1.24506	17	1.18328		21	46	-2.51882	2.00865	19	1.25399
														37	5	-0.876056	0.802111	16	1.09219		21	47	-1.81783	3.10315	12	0.585801
														37	6	-0.847848	0.966931	14	0.876844		21	48	-2.4956	2.67303	15	0.93362
														37	7	-0.617197	0.654319	23	0.943266		21	49	-1.55934	2.81204	17	0.554523
														37	8	0.011438	0.858151	18	0.0133287		21	50	-1.38003	1.73896	18	0.793596
														37	9	-0.219051	1.02151	18	0.214438		21	51	-1.20702	2.33215	12	0.517554
														37	10	-0.457468	0.69853	18	0.654901		21	52	-2.28272	2.62523	18	0.869531
														37	11	-0.467259	0.791432	13	0.590397		21	53	-0.382661	1.3917	14	0.27496
														37	12	0.0294932	0.950225	22	0.0310381		21	54	-1.10921	3.42518	16	0.323839
														37	13	-0.171597	0.759691	14	0.225877		21	55	-1.12399	2.40816	13	0.46674
														37	14	-0.690451	0.804848	15	0.857865		21	56	-1.92761	3.11821	18	0.618177
														37	15	-0.250669	0.512597	14	0.489017		21	57	-0.743368	1.74182	11	0.426777
														37	16	0.0679811	0.722656	21	0.0940712		21	58	-0.467191	3.24229	11	0.144093
														37	17	-0.0220021	0.894534	11	0.0245961		21	59	-0.547445	1.86552	15	0.293454
														37	18	0.235417	1.01747	22	0.231375		21	60	-1.37163	2.70161	14	0.507708
														37	19	0.026597	1.03331	14	0.0257395		21	61	-1.33437	2.74153	11	0.486726
														37	20	-0.0843538	0.661078	18	0.1276		21	62	-1.44282	3.06737	15	0.470376
														37	21	-0.34751	0.743133	16	0.467628		21	63	-0.950086	2.65962	21	0.357226
														37	22	-0.29059	1.00562	16	0.288967		21	64	-3.35895	2.86516	9	1.17235
														37	23	-0.205585	0.742799	10	0.27677		21	65	-0.791385	2.38618	20	0.331654
														37	24	0.444813	1.08003	19	0.411851		21	66	-2.33462	3.4873	16	0.669464
														37	25	-0.0987514	1.03243	13	0.095649		21	67	-0.0301286	2.40173	11	0.0125446
														37	26	0.526963	0.998517	18	0.527746		21	68	-0.971888	2.23578	14	0.434698
														37	27	-0.37414	0.885733	9	0.422407		21	69	-1.46059	3.56971	15	0.409161
														37	28	-0.928772	1.01874	13	0.911687		21	70	-0.451906	4.05881	7	0.11134
														37	29	-0.138313	1.21701	24	0.113649		21	71	-1.08146	3.55583	17	0.304137
														37	30	0.14982	0.971118	12	0.154276		22	0	-1.60795	1.446	17	1.112
														37	31	0.758629	1.20374	18	0.630225		22	1	-0.964913	1.54707	11	0.623703
														37	32	0.313372	1.27385	14	0.246005		22	2	-1.6442	2.2418	15	0.733427
														37	33	0.563112	1.25635	17	0.448211		22	3	-0.737003	1.53219	9	0.481013
														37	34	0.536573	1.33617	19	0.401575		22	4	-0.0324085	1.37428	11	0.0235822
														37	35	-0.577644	1.58314	15	0.364873		22	5	-0.252128	1.64183	19	0.153565
														37	36	0.80258	1.28619	14	0.624		22	6	-1.56374	2.13601	12	0.732084
														37	37	0.419969	1.2099	59	0.347112		22	7	-1.28726	2.4873	10	0.517534
														37	38	-0.636908	0.628794	17	1.0129		22	8	-0.119975	1.1588	18	0.103534
														37	39	0.585717	1.30425	13	0.449082		22	9	-1.04453	1.72161	15	0.606714
														37	40	0.381361	0.892316	10	0.427383		22	10	-1.65317	1.86274	8	0.887494
														37	41	0.281242	1.01244	12	0.277785		22	11	-1.07949	1.83154	17	0.589389
														38	0	0.0183139	1.41774	13	0.0129177		22	12	0.0347509	1.80765	14	0.0192243
														38	1	-0.351766	1.3222	20	0.266046		22	13	-0.484375	1.5529	9	0.311916
														38	2	0.0381882	1.27384	15	0.0299788		22	14	-1.08495	1.32056	14	0.821586
														38	3	-0.658752	1.72881	10	0.381043		22	15	-1.06795	1.66213	16	0.642522
														38	4	0.0489699	2.12511	14	0.0230435		22	16	-0.620524	1.15831	14	0.535713
														38	5	-0.377625	1.37728	17	0.274181		22	17	0.249609	1.57397	13	0.158585
														38	6	-0.961276	1.24448	16	0.772434		22	18	-1.58168	1.84199	20	0.858679
														38	7	-0.543749	1.30414	18	0.41694		22	19	-1.58544	1.74468	15	0.908726
														38	8	-0.432121	1.46972	19	0.294016		22	20	-1.06964	1.8583	10	0.575601
														38	9	-0.769362	1.40387	12	0.548031		22	21	-1.70373	1.21702	13	1.39992
														38	10	-0.257546	1.09098	11	0.23607		22	22	-0.459564	1.67418	92	0.274501
														38	11	0.604254	1.38792	11	0.435368		22	23	-3.13036	1.28654	13	2.43315
														38	12	-0.512807	1.04901	18	0.488849		22	24	-1.02989	1.11829	16	0.920945
														38	13	-0.0174468	1.30509	15	0.0133682		22	25	-1.65147	0.935863	11	1.76465
														38	14	0.691138	1.53068	15	0.451524		22	26	-0.1339	1.13154	13	0.118335
														38	15	0.0192319	1.36588	17	0.0140802		22	27	-2.35987	1.90112	17	1.24131
														38	16	0.143627	1.21437	18	0.118272		22	28	-1.4553	1.49647	11	0.972486
														38	17	-0.244645	1.18989	14	0.205603		22	29	-0.817085	1.10673	10	0.73829
														38	18	0.597701	1.40704	17	0.424792		22	30	-1.0463	1.93543	18	0.540603
														38	19	0.393195	1.35229	10	0.290761		22	31	0.105997	1.33014	19	0.0796881
														38	20	0.0864582	1.41649	21	0.0610371		22	32	-1.45112	1.59578	16	0.909352
														38	21	-0.0204986	1.74834	22	0.0117246		22	33	-0.244553	1.9369	16	0.12626
														38	22	0.115652	1.34497	18	0.0859888		22	34	-0.93154	2.27627	21	0.40924
														38	23	-0.248836	2.2405	10	0.111063		22	35	-0.598887	1.98503	10	0.301701
														38	24	0.724279	1.28219	15	0.564875		22	36	-0.814907	2.10384	13	0.387342
														38	25	0.643268	1.55032	17	0.414927		22	37	-2.44902	2.22694	9	1.09973
														38	26	0.691376	1.61468	16	0.428181		22	38	-0.801009	1.4517	13	0.551775
														38	27	1.13374	1.54729	18	0.732727		22	39	-0.628606	2.16161	12	0.290805
														38	28	0.900401	1.71721	15	0.52434		22	40	-0.391475	2.45072	22	0.159739
														38	29	1.20382	1.79678	15	0.669985		22	41	-0.569852	1.63475	18	0.348587
														38	30	0.976178	2.12076	14	0.460297		22	42	-0.23039	2.15673	13	0.106824
														38	31	0.964656	1.49007	18	0.647389		22	43	-0.341066	1.9696	15	0.173165
														38	32	1.42274	1.66973	16	0.852082		22	44	-0.853875	1.70462	13	0.500918
														38	33	1.0188	2.30514	14	0.44197		22	45	-2.53136	2.39421	17	1.05728
														38	34	1.20093	1.09209	15	1.09966		22	46	-1.41794	1.43725	19	0.986562
														38	35	1.10017	2.40095	19	0.458222		22	47	-1.98045	2.59755	13	0.76243
														38	36	2.4877	1.58134	19	1.57316		22	48	-0.53689	1.92008	7	0.279618
														38	37	2.73775	1.18265	17	2.31494		22	49	-1.23234	1.90954	22	0.64536
														38	38	1.97854	1.61848	59	1.22247		22	50	-0.657384	1.78997	20	0.367259
														38	39	2.21064	1.90005	18	1.16346		22	51	-0.534414	1.3983	21	0.382187
														38	40	1.02627	1.62381	16	0.632012		22	52	0.109302	2.18694	14	0.0499797
														38	41	0.994476	1.24884	16	0.796316		22	53	0.122748	1.89295	16	0.064845
														39	0	1.01593	0.580909	16	1.74887		22	54	-1.96329	1.21288	13	1.61871
														39	1	0.695928	0.413898	20	1.6814		22	55	-1.59827	1.76917	14	0.903405
														39	2	0.757557	0.482124	25	1.57129		22	56	-1.43929	1.37607	14	1.04595
														39	3	0.578326	0.615586	17	0.939472		22	57	-0.662223	1.13423	14	0.583851
														39	4	0.573744	0.59176	13	0.969555		22	58	-0.490671	1.95601	16	0.250853
														39	5	0.420899	0.424204	15	0.992209		22	59	-0.0335347	1.2836	17	0.0261256
														39	6	0.819179	0.618065	15	1.32539		22	60	0.493243	1.86591	11	0.264344
														39	7	0.526825	0.497654	20	1.05862		22	61	-0.166564	1.95071	18	0.0853863
														39	8	0.468383	0.498901	14	0.938829		22	62	-0.82707	2.28638	15	0.361739
														39	9	0.4861	0.513978	16	0.945759		22	63	-0.56188	1.60206	11	0.350724
														39	10	0.742853	0.405461	17	1.83212		22	64	-1.76497	2.13604	14	0.82628
														39	11	0.286386	0.526109	14	0.544347		22	65	-0.232935	2.25535	11	0.103281
														39	12	0.66923	0.472619	19	1.416		22	66	-0.2485	1.66866	14	0.148922
														39	13	0.866326	0.520837	15	1.66333		22	67	0.11557	1.69629	10	0.068131
														39	14	0.70567	0.488874	9	1.44346		22	68	0.283117	1.88053	16	0.150552
														39	15	0.654404	0.517627	17	1.26424		22	69	0.322334	1.805	11	0.178579
														39	16	0.935754	0.559992	19	1.67101		22	70	0.334094	2.50833	12	0.133194
														39	17	0.521801	0.472574	11	1.10417		22	71	1.27225	1.96859	13	0.646277
														39	18	0.593414	0.581311	20	1.02082		23	0	4.88026	1.68272	20	2.90021
														39	19	0.974022	0.536538	15	1.81538		23	1	4.55023	2.90873	20	1.56434
														39	20	0.575209	0.421072	14	1.36606		23	2	5.01777	2.36336	18	2.12316
														39	21	0.931462	0.600886	19	1.55015		23	3	5.12932	2.02826	18	2.52892
														39	22	1.05161	0.74743	21	1.40696		23	4	3.74256	1.65657	13	2.25923
														39	23	0.92076	0.61166	13	1.50535		23	5	4.58745	2.50477	24	1.83149
														39	24	1.11617	0.616853	18	1.80946		23	6	4.19012	2.47976	27	1.68973
														39	25	1.02455	0.492617	18	2.07981		23	7	4.56147	3.24659	15	1.405
														39	26	0.901099	0.533358	17	1.68948		23	8	4.45269	2.91664	19	1.52665
														39	27	0.942387	0.59082	18	1.59505		23	9	3.60734	2.64811	11	1.36223
														39	28	0.865411	0.680172	14	1.27234		23	10	2.80562	2.22528	17	1.26079
														39	29	0.954606	0.911287	9	1.04754		23	11	5.35112	3.05558	13	1.75126
														39	30	1.16325	0.765422	14	1.51975		23	12	4.08597	1.88583	16	2.16667
														39	31	1.58548	0.549136	20	2.88723		23	13	4.6298	1.64141	15	2.82061
														39	32	0.970061	0.555189	18	1.74726		23	14	5.90379	2.13291	11	2.76795
														39	33	1.42923	0.392242	16	3.64376		23	15	5.03822	2.0725	21	2.43098
														39	34	0.901269	0.576574	19	1.56314		23	16	3.0613	1.61222	9	1.89882
														39	35	1.02744	0.829804	17	1.23817		23	17	4.12536	2.15385	16	1.91535
														39	36	0.902198	0.65351	17	1.38054		23	18	4.85802	2.52402	17	1.92472
														39	37	0.759905	0.540914	13	1.40485		23	19	5.00531	2.79081	12	1.7935
														39	38	0.700076	0.56228	18	1.24507		23	20	5.09838	1.64412	13	3.10097
														39	39	1.13606	0.756757	60	1.50122		23	21	5.85457	3.61773	13	1.6183
														39	40	0.673961	0.738374	13	0.912765		23	22	7.72862	3.29009	13	2.34906
														39	41	0.304792	0.700162	7	0.435317		23	23	5.41109	2.34942	100	2.30316
														40	0	0.119433	0.704833	11	0.169449		23	24	6.49126	1.6013	13	4.05373
														40	1	0.305357	0.84205	12	0.362636		23	25	4.554	1.66016	15	2.74311
														40	2	0.261643	0.8017	14	0.32636		23	26	4.03359	2.06886	18	1.94966
														40	3	0.23959	0.692099	18	0.346179		23	27	5.25967	3.11144	20	1.69043
														40	4	0.21273	0.756789	13	0.281096		23	28	4.16095	3.73727	10	1.11337
														40	5	0.712267	0.930554	12	0.765422		23	29	5.59544	1.51496	11	3.69347
														40	6	0.760368	0.482336	11	1.57643		23	30	5.92999	1.85574	19	3.19549
														40	7	0.532795	0.679134	18	0.784521		23	31	6.46552	3.06892	12	2.10677
														40	8	0.469435	0.498883	10	0.940971		23	32	5.47344	2.55017	21	2.1463
														40	9	0.315684	1.08455	17	0.291075		23	33	4.84843	2.25639	16	2.14876
														40	10	0.385369	0.980231	12	0.393141		23	34	6.76047	3.1345	15	2.15679
														40	11	1.03389	0.527298	9	1.96073		23	35	4.88563	2.3731	18	2.05876
														40	12	0.710424	1.09017	18	0.651666		23	36	4.21546	2.99409	22	1.40793
														40	13	0.736008	0.920084	17	0.799936		23	37	5.25628	2.10844	15	2.49297
														40	14	0.592111	0.844196	15	0.701391		23	38	5.76016	3.40968	15	1.68936
														40	15	0.924203	1.1139	16	0.829697		23	39	5.07099	3.02088	16	1.67865
														40	16	0.749018	0.870084	18	0.860857		23	40	6.91676	3.273	20	2.11328
														40	17	1.1389	0.946534	15	1.20324		23	41	5.6632	2.01598	17	2.80915
														40	18	1.08001	1.05765	10	1.02115		23	42	5.038	2.7359	17	1.84145
														40	19	1.01894	0.977563	17	1.04232		23	43	4.59434	2.78015	25	1.65255
														40	20	1.02296	0.821651	18	1.24501		23	44	3.3866	1.48953	22	2.2736
														40	21	0.686661	1.13062	22	0.60733		23	45	5.33091	4.33492	9	1.22976
														40	22	1.17455	0.825291	15	1.4232		23	46	5.23209	3.17751	12	1.6466
														40	23	1.23915	1.25911	15	0.984145		23	47	5.67467	3.99472	12	1.42054
														40	24	1.56181	0.731081	16	2.1363		23	48	5.20101	2.69442	16	1.93029
														40	25	2.02184	0.947971	14	2.1328		23	49	6.29694	4.07416	16	1.54558
														40	26	1.66734	0.712806	19	2.33912		23	50	5.01832	2.97795	13	1.68516
														40	27	1.37143	0.61393	16	2.23385		23	51	5.58455	2.77546	13	2.01212
														40	28	0.764159	1.30368	10	0.586156		23	52	5.66216	2.87154	20	1.97182
														40	29	1.75147	0.89414	14	1.95883		23	53	4.53688	3.2372	16	1.40148
														40	30	1.25759	0.970562	7	1.29574		23	54	5.44336	2.17957	12	2.49745
														40	31	1.59577	0.969238	21	1.64642		23	55	3.8509	2.51155	14	1.53328
														40	32	1.89994	1.13034	12	1.68086		23	56	3.73491	2.98796	17	1.24999
														40	33	3.1823	0.838968	17	3.79312		23	57	4.27368	2.4172	17	1.76803
														40	34	2.28195	0.674238	14	3.38449		23	58	4.67468	1.92473	18	2.42875
														40	35	0.933256	1.22034	15	0.764752		23	59	4.35682	1.7916	14	2.43181
														40	36	1.36036	1.27837	14	1.06414		23	60	4.30622	2.41492	18	1.78317
														40	37	1.85581	0.912607	10	2.03353		23	61	4.46352	2.21456	15	2.01553
														40	38	2.09035	1.11423	16	1.87605		23	62	4.57565	2.78793	19	1.64124
														40	39	2.52528	0.928939	13	2.71845		23	63	4.00254	2.52211	11	1.58698
														40	40	3.20449	1.39134	54	2.30318		23	64	3.7606	1.74832	15	2.15098
														40	41	2.25187	1.58444	13	1.42124		23	65	4.88323	2.49359	20	1.95832
														41	0	0.493387	0.370127	6	1.33302		23	66	4.43002	2.51634	22	1.7605
														41	1	0.733124	0.48257	12	1.51921		23	67	4.46254	2.16773	15	2.05862
														41	2	0.591786	0.363142	13	1.62963		23	68	4.27252	2.32877	15	1.83467
														41	3	0.457206	0.527523	13	0.866703		23	69	5.38756	2.65093	19	2.03233
														41	4	0.391865	0.364721	11	1.07443		23	70	5.8297	3.71681	16	1.56847
														41	5	0.763706	0.517559	13	1.47559		23	71	4.06441	3.00417	12	1.35292
														41	6	0.849812	0.495642	9	1.71457		24	0	0.0617868	3.16639	20	0.0195133
														41	7	0.715727	0.343887	11	2.08129		24	1	0.784818	2.89318	17	0.271265
														41	8	0.95166	0.41328	16	2.3027		24	2	0.422517	3.23148	15	0.13075
														41	9	1.30686	0.560217	13	2.33278		24	3	0.375754	2.3831	14	0.157675
														41	10	0.947456	0.372212	9	2.54547		24	4	1.46107	1.89604	12	0.770592
														41	11	0.981089	0.293579	7	3.34182		24	5	0.281786	2.32108	15	0.121403
														41	12	0.947765	0.373569	20	2.53705		24	6	0.450064	2.39803	10	0.18768
														41	13	1.10729	0.405865	10	2.72822		24	7	-0.44497	1.91188	15	0.232739
														41	14	0.859354	0.381606	13	2.25194		24	8	-2.30085	4.2248	14	0.544606
														41	15	0.917259	0.493768	18	1.85767		24	9	1.30447	1.5753	17	0.828077
														41	16	1.02336	0.347262	14	2.94693		24	10	1.20672	1.66171	14	0.726193
														41	17	0.946406	0.428199	14	2.2102		24	11	1.19737	1.86017	21	0.643689
														41	18	1.09916	0.440275	17	2.49653		24	12	2.43718	2.32084	10	1.05013
														41	19	0.90458	0.409753	13	2.20762		24	13	1.03862	2.74969	9	0.377723
														41	20	0.917468	0.277499	18	3.30621		24	14	0.89569	1.91787	12	0.467023
														41	21	1.01314	0.491468	21	2.06145		24	15	0.730725	1.83883	12	0.397387
														41	22	0.702921	0.634435	11	1.10795		24	16	0.309951	2.23663	14	0.13858
														41	23	0.837232	0.626552	10	1.33625		24	17	0.588473	1.89029	19	0.311313
														41	24	0.783958	0.250246	14	3.13275		24	18	0.997765	2.13659	17	0.46699
														41	25	0.991967	0.546105	12	1.81644		24	19	1.14454	2.01728	19	0.567368
														41	26	0.710703	0.445629	12	1.59483		24	20	1.82054	2.07216	14	0.87857
														41	27	1.14885	0.590699	11	1.9449		24	21	0.806325	1.64391	17	0.490492
														41	28	0.583751	0.668201	9	0.873616		24	22	2.57776	2.05386	16	1.25508
														41	29	0.786455	0.863152	15	0.911144		24	23	-3.07415	1.20562	13	2.54984
														41	30	0.908676	0.510481	12	1.78004		24	24	0.978925	2.43014	93	0.402826
														41	31	1.03675	0.854309	10	1.21355		24	25	-2.07175	1.73916	13	1.19123
														41	32	0.600691	0.541102	15	1.11013		24	26	0.151692	2.84189	15	0.0533771
														41	33	0.634637	0.910119	14	0.697311		24	27	2.53717	2.33564	18	1.08629
														41	34	1.72981	0.608899	7	2.84089		24	28	1.93972	2.36694	13	0.819504
														41	35	0.695188	0.672482	14	1.03376		24	29	2.73571	1.89081	19	1.44685
														41	36	0.767089	0.765432	12	1.00216		24	30	2.8958	1.39171	17	2.08075
														41	37	0.754488	0.778513	12	0.96914		24	31	3.53365	1.21214	7	2.91522
														41	38	0.568761	0.757374	16	0.750964		24	32	2.52469	1.41715	15	1.78153
														41	39	0.649172	0.845502	7	0.767795		24	33	1.96847	2.16784	12	0.908034
														41	40	-0.304555	0.793617	13	0.383755		24	34	3.05223	2.06586	17	1.47747
														41	41	1.21902	0.790533	47	1.54203		24	35	2.1598	2.53861	8	0.850779
																					24	36	1.75881	2.53298	12	0.694364
																					24	37	3.05968	2.41866	11	1.26503
																					24	38	2.42505	1.93438	14	1.25366
																					24	39	3.20632	1.53344	14	2.09094
																					24	40	3.46963	1.74535	9	1.98794
																					24	41	2.42372	2.16167	10	1.12123
																					24	42	2.12068	1.17947	9	1.798
																					24	43	1.30777	2.30295	20	0.567868
																					24	44	1.2619	2.00822	26	0.628371
																					24	45	3.11841	2.51782	19	1.23854
																					24	46	3.2142	1.91563	15	1.67788
																					24	47	3.47128	2.17046	10	1.59933
																					24	48	2.40262	1.45722	18	1.64877
																					24	49	3.03194	2.03932	13	1.48674
																					24	50	3.30107	1.99208	21	1.6571
																					24	51	2.58706	2.30159	13	1.12403
																					24	52	2.46164	1.61644	13	1.52288
																					24	53	2.92541	2.66522	13	1.09762
																					24	54	3.73904	2.27648	12	1.64246
																					24	55	3.66243	2.62688	12	1.39422
																					24	56	3.56208	2.44581	19	1.4564
																					24	57	2.60744	2.14739	9	1.21424
																					24	58	2.84997	1.65584	20	1.72117
																					24	59	3.04254	2.41226	16	1.26128
																					24	60	1.52123	2.67982	15	0.567661
																					24	61	3.51822	2.94874	14	1.19313
																					24	62	2.24232	1.88208	19	1.1914
																					24	63	3.96643	1.1835	14	3.35144
																					24	64	3.66471	3.36006	11	1.09067
																					24	65	2.31416	1.88967	19	1.22464
																					24	66	3.87656	1.94396	6	1.99415
																					24	67	2.85407	1.94756	12	1.46546
																					24	68	2.87093	2.01476	20	1.42495
																					24	69	4.01302	1.8159	12	2.20993
																					24	70	3.25866	2.39806	13	1.35887
																					24	71	4.50868	3.58544	10	1.2575
																					25	0	3.10905	1.50485	12	2.06602
																					25	1	3.09243	1.82663	12	1.69297
																					25	2	3.03793	1.67041	21	1.81868
																					25	3	3.14757	2.03883	6	1.54382
																					25	4	3.58664	1.68862	20	2.12401
																					25	5	3.53842	1.72336	17	2.05322
																					25	6	4.10158	2.15956	15	1.89926
																					25	7	2.95501	1.6655	17	1.77425
																					25	8	3.73244	2.50447	19	1.49031
																					25	9	2.7101	1.3237	15	2.04737
																					25	10	2.45653	0.975467	11	2.51832
																					25	11	1.59232	1.9859	11	0.801815
																					25	12	1.99731	1.70192	23	1.17356
																					25	13	2.45553	1.55693	14	1.57716
																					25	14	2.49496	1.80568	10	1.38173
																					25	15	3.07909	1.50527	20	2.04554
																					25	16	3	2.2149	13	1.35446
																					25	17	4.24475	2.36529	8	1.7946
																					25	18	2.62265	1.61185	19	1.62711
																					25	19	2.17139	1.06876	18	2.03169
																					25	20	1.24388	2.45031	8	0.507642
																					25	21	2.38991	1.56595	16	1.52617
																					25	22	2.37953	2.18358	11	1.08974
																					25	23	0.240644	1.43154	15	0.168101
																					25	24	2.71116	2.22205	13	1.22012
																					25	25	3.41967	1.93548	93	1.76683
																					25	26	4.83061	2.24024	11	2.15629
																					25	27	1.78176	1.7742	12	1.00426
																					25	28	2.07157	2.03732	13	1.01681
																					25	29	1.40688	2.03805	19	0.690307
																					25	30	3.20651	1.63335	16	1.96315
																					25	31	2.18076	1.7523	11	1.24451
																					25	32	3.43052	1.61862	20	2.11942
																					25	33	3.98592	1.61729	15	2.46457
																					25	34	4.56945	1.90856	14	2.39419
																					25	35	4.64134	1.54218	16	3.00959
																					25	36	1.22494	2.41686	10	0.50683
																					25	37	3.40234	1.95929	11	1.73652
																					25	38	2.5784	2.01807	16	1.27765
																					25	39	2.43503	2.05329	12	1.18592
																					25	40	4.25586	1.77625	26	2.39598
																					25	41	4.15798	1.23933	16	3.35501
																					25	42	4.87317	1.7173	19	2.83769
																					25	43	4.05261	2.13695	17	1.89645
																					25	44	4.61236	1.73964	21	2.65134
																					25	45	1.84818	2.00006	12	0.924064
																					25	46	3.51388	1.93344	16	1.81743
																					25	47	2.30536	2.4722	13	0.932515
																					25	48	2.2713	2.92601	10	0.776244
																					25	49	4.9346	1.60153	13	3.08119
																					25	50	4.35605	2.14024	10	2.03531
																					25	51	5.40796	2.74321	15	1.9714
																					25	52	6.28869	2.6386	15	2.38334
																					25	53	5.0232	1.96305	11	2.55887
																					25	54	1.59547	2.60201	13	0.613169
																					25	55	3.58041	1.81314	10	1.9747
																					25	56	3.06786	2.43581	16	1.25948
																					25	57	2.84948	1.70237	12	1.67383
																					25	58	4.35254	1.99538	13	2.18131
																					25	59	4.59268	1.75496	13	2.61697
																					25	60	5.34714	2.42974	18	2.2007
																					25	61	5.47426	2.31443	19	2.36528
																					25	62	4.57773	2.86934	19	1.59539
																					25	63	1.95567	3.07911	12	0.635141
																					25	64	3.43355	1.44601	14	2.3745
																					25	65	3.45049	2.14583	13	1.608
																					25	66	4.95367	2.0699	12	2.39319
																					25	67	5.75414	2.73654	16	2.10271
																					25	68	4.48513	2.36816	21	1.89393
																					25	69	6.61861	3.21161	14	2.06084
																					25	70	6.90438	2.7852	20	2.47895
																					25	71	6.12669	3.09247	16	1.98117
																					26	0	2.73828	2.22575	17	1.23027
																					26	1	1.96013	1.5713	15	1.24746
																					26	2	2.42176	1.90334	24	1.27238
																					26	3	1.87101	1.80037	17	1.03923
																					26	4	1.9966	1.89625	15	1.05292
																					26	5	2.45368	2.0554	15	1.19377
																					26	6	2.30865	2.48329	16	0.929675
																					26	7	2.22968	2.44097	13	0.913442
																					26	8	0.175194	3.02497	17	0.057916
																					26	9	2.61527	2.0541	12	1.2732
																					26	10	1.68373	1.45625	14	1.15621
																					26	11	2.97908	1.47251	10	2.02313
																					26	12	2.06473	1.67109	14	1.23556
																					26	13	1.67138	2.08909	18	0.800051
																					26	14	1.77129	2.53307	11	0.699265
																					26	15	2.00439	2.54163	18	0.788627
																					26	16	2.36869	3.13091	13	0.756552
																					26	17	2.9849	3.34811	12	0.891518
																					26	18	1.20392	2.15594	11	0.558419
																					26	19	2.07388	2.01044	7	1.03155
																					26	20	1.64288	2.45593	11	0.668943
																					26	21	0.515492	2.62341	9	0.196497
																					26	22	0.738176	2.67586	13	0.275865
																					26	23	0.152984	1.55188	18	0.0985796
																					26	24	1.39001	2.06065	15	0.674552
																					26	25	-0.968754	3.07643	11	0.314895
																					26	26	1.86297	2.40138	85	0.775788
																					26	27	0.923826	2.31879	15	0.398409
																					26	28	0.407232	1.9059	9	0.213669
																					26	29	1.90628	1.57801	13	1.20803
																					26	30	1.41787	3.73058	16	0.380067
																					26	31	2.30875	1.72336	14	1.33968
																					26	32	1.75838	1.71632	16	1.02451
																					26	33	1.66612	1.31453	10	1.26746
																					26	34	2.47244	1.96487	13	1.25833
																					26	35	2.06694	2.96389	10	0.697373
																					26	36	1.46519	1.95848	8	0.748127
																					26	37	1.59807	2.29742	15	0.695595
																					26	38	1.21477	2.29482	14	0.529352
																					26	39	1.55164	3.76382	14	0.412252
																					26	40	0.574898	2.68663	15	0.213985
																					26	41	2.39468	2.92665	15	0.818232
																					26	42	2.07089	2.34296	11	0.883879
																					26	43	2.48409	1.4114	17	1.76002
																					26	44	2.31852	2.25698	17	1.02727
																					26	45	2.26417	3.40902	13	0.664171
																					26	46	1.34745	3.70071	17	0.364105
																					26	47	0.932279	2.24011	12	0.416176
																					26	48	2.22915	3.13357	13	0.711376
																					26	49	1.35743	2.21452	9	0.612967
																					26	50	1.83983	2.71051	15	0.678777
																					26	51	-0.204873	3.07031	13	0.0667274
																					26	52	1.52772	4.14796	11	0.368305
																					26	53	3.66199	2.55055	6	1.43577
																					26	54	1.98805	3.65579	10	0.543808
																					26	55	0.378368	2.75551	15	0.137313
																					26	56	0.670247	3.07693	15	0.217829
																					26	57	1.2029	1.73234	15	0.694376
																					26	58	1.28366	2.14313	17	0.598966
																					26	59	1.25247	1.79305	17	0.698516
																					26	60	1.49962	2.46459	15	0.608466
																					26	61	1.8887	4.29109	10	0.440144
																					26	62	0.254448	2.69418	15	0.0944437
																					26	63	3.89654	1.83421	11	2.12437
																					26	64	1.83485	2.36027	19	0.777393
																					26	65	1.90101	3.07031	18	0.619159
																					26	66	1.64044	1.73239	11	0.946925
																					26	67	0.210824	3.08416	16	0.068357
																					26	68	0.735702	3.26253	16	0.225501
																					26	69	-0.430502	3.17646	9	0.135529
																					26	70	0.796157	4.38591	12	0.181526
																					26	71	2.65159	3.31723	10	0.799337
																					27	0	0.575037	1.86282	19	0.308692
																					27	1	-0.00483933	1.44422	15	0.00335084
																					27	2	-0.160255	1.18095	13	0.1357
																					27	3	0.772543	1.83533	22	0.420929
																					27	4	-0.139611	1.58953	16	0.087832
																					27	5	0.483605	2.10529	14	0.229709
																					27	6	0.855147	2.0347	23	0.420281
																					27	7	2.46268	2.18215	15	1.12856
																					27	8	1.03745	1.31123	19	0.791207
																					27	9	1.26458	1.43723	18	0.879872
																					27	10	0.551834	1.56947	16	0.351606
																					27	11	1.11317	1.70118	16	0.654351
																					27	12	0.273662	1.05939	16	0.258319
																					27	13	0.809063	0.884182	15	0.915041
																					27	14	0.847598	1.38891	12	0.610262
																					27	15	0.782097	1.29363	14	0.604577
																					27	16	2.064	1.27424	17	1.61979
																					27	17	1.20376	1.76235	13	0.683039
																					27	18	0.901586	1.26858	12	0.710708
																					27	19	2.1991	1.34095	18	1.63996
																					27	20	1.82674	1.77116	15	1.03138
																					27	21	1.76373	0.916314	13	1.92481
																					27	22	1.22765	1.38342	17	0.887399
																					27	23	0.622841	1.71844	20	0.362446
																					27	24	1.92652	1.88116	18	1.02411
																					27	25	2.1958	1.23933	12	1.77177
																					27	26	1.70367	1.64607	15	1.03499
																					27	27	0.992038	1.59947	100	0.620227
																					27	28	0.539314	1.97026	11	0.273728
																					27	29	0.862787	1.78352	18	0.483755
																					27	30	1.67866	1.45738	24	1.15184
																					27	31	1.44644	1.42135	14	1.01765
																					27	32	0.722477	1.42206	22	0.508052
																					27	33	1.17133	1.05251	18	1.11289
																					27	34	1.88886	1.23121	16	1.53415
																					27	35	1.6977	1.95291	17	0.869321
																					27	36	0.32735	2.25534	14	0.145145
																					27	37	0.388312	1.72431	13	0.225198
																					27	38	1.12075	1.23858	21	0.90487
																					27	39	1.05177	2.48824	12	0.422696
																					27	40	1.22681	1.91677	12	0.640041
																					27	41	2.12952	2.03228	17	1.04784
																					27	42	1.92699	2.08389	13	0.924708
																					27	43	1.27159	1.49366	13	0.851328
																					27	44	2.74128	2.44119	12	1.12293
																					27	45	0.956656	2.19038	18	0.436753
																					27	46	-0.193332	2.08323	18	0.0928038
																					27	47	-0.14177	1.8362	13	0.0772085
																					27	48	0.121197	2.39936	12	0.0505121
																					27	49	1.17692	0.986892	14	1.19256
																					27	50	1.52411	1.68032	16	0.907035
																					27	51	2.46641	1.84469	21	1.33703
																					27	52	1.88446	2.56144	7	0.735703
[truncated: 3,187 more rows]
